# Supplementary material
Source: Elsevier journal article supplement (https://www.sciencedirect.com/science/article/pii/S1130147316000233)
Supplement: mmc1 [file S1130147316000233:mmc1.docx]

**PROGRAMA DE FORMACIÓN EN NEUROCIRUGÍA** (Diciembre, 2015)

**Índice del Programa:**

**.- Introducción ……………………………………………………………………………………….. Pág 1 .- Definición de la especialidad de Neurocirugía y su campo de acción…… Pág 2 .- Elaboración del Programa. Dominios competenciales……………………..…. Pág 3**

**.- La instrucción del residente (aprendizaje basado en la práctica) …….... Pág 4**

**.- Rotaciones anuales y mapas de competencias a adquirir. …… ……..…… Pág 8**

**.- La evaluación del residente, el staff docente y el programa……………… Pág 31**

**.- Funciones del tutor de residentes ……………………………………………………… Pág 32**

**.- Apéndice 1 ………………………………………………………………..………………………. Pág 34**

**1) INTRODUCCIÓN AL PROGRAMA**

Las nuevas demandas de fiabilidad (“accountability”) por parte del público y la sociedad civil en el siglo XXI exigen que los profesionales médicos demuestren un nivel de competencia clínica apropiado que ha de quedar prefijado en los curricula del grado, los programas de residencia y en las guías de calidad y estándares de buena práctica clínica. Los nuevos programas formativos que utilizan la enseñanza basada en competencias (EBCs) definen qué deben ser capaces de hacer el estudiante y el residente en las diferentes etapas de su formación, y hacen de la evaluación objetiva estructurada de la competencia clínica su componente fundamental. Esto los diferencia de los convencionales o basados en proceso, en los que el residente perseguía con mayor o menor éxito unos objetivos cuyo alcance no se contrastaba con objetividad.

El presente programa de Neurocirugía basado en competencias utiliza el mapa del Accreditation Council for Graduate Medical Education (ACGME) que incluye los dominios competenciales de: Conocimiento médico, Cuidado del paciente, Comunicación y relaciones interpersonales, Profesionalismo, Aprendizaje basado en la práctica y mejora de ambos, Práctica basada en sistemas, Colaboración interprofesional y Desarrollo profesional y personal. Dado que el Conocimiento médico y el Cuidado del paciente son los dominios de mayor peso y que cambian más sus contenidos de año en año, el programa utiliza un mapa adicional (ver **Anexo 1**) que explicita con detalle las subcompetencias de estos dos dominios en los sucesivos años de la residencia.

Los extensos listados de subcompetencias incluidos en el programa representan una relación de “máximos a adquirir”, y no deben ser utilizados de manera prescriptiva comprobando puntualmente si se adquiere cada una de ellas, sino para orientar al residente acerca de qué competencias debe adquirir, y a sus evaluadores acerca de qué deben considerar al aplicar la instrucción y medir el nivel de competencia. Es bien sabido que las competencias se adquieren de manera longitudinal y progresiva a lo largo del periodo formativo, lo que explica que muchas reaparezcan con el mismo enunciado en años sucesivos del programa; por ejemplo, la competencia para manejar las búsquedas bibliográficas que permiten resolver los problemas encontrados en la práctica diaria, figura todos los años en el dominio de “Aprendizaje basado en la práctica” ya que el residente va perfeccionando las subcompetencias de este dominio desde el inicio al final de su formación, al igual que ocurre con las incluida en los otros siete dominios.

Dado que el ritmo de adquisición de las competencias varía entre residentes según la capacidad y dedicación de cada uno, ha de entenderse que los compartimentos o niveles básico, medio y avanzado (o junior, medio y senior) utilizados en este programa y su Anexo 1 para adscribir las subcompetencias de los diferentes dominios han de funcionar como “vasos comunicantes” que el propio residente nivelará con la ayuda del tutor en caso de identificar retardos o deficiencias en su progreso formativo. Así, las subcompetencias pueden ser retomadas y completadas en diferentes momentos del periodo formativo. La utilización de las “milestones” como marcadores de enfoque holístico de los niveles de competencia facilita la identificación de los pasos del residente por el trayecto formativo y la necesidad de enmienda si se “rezaga” en el progreso por uno o más dominios competenciales.

Para facilitar el conocimiento del nuevo programa publicamos el documento “El nuevo programa de Residencia en Neurocirugía basado en competencias” (RD Lobato y cols, 2016) que aparece en el mismo número la revista Neurocirugía en el que se presenta la versión on-line del programa.

**2) DEFINICIÓN de la ESPECIALIDAD de NEUROCIRUGÍA**

La Neurocirugía es una disciplina de la medicina y una especialidad médica de carácter quirúrgico que se ocupa del estudio y tratamiento, i.e., de la prevención, diagnóstico, evaluación, terapéutica, cuidado intensivo y rehabilitación de las enfermedades quirúrgicas o potencialmente quirúrgicas del sistema nervioso central, periférico y autónomo, incluyendo sus cubiertas, vascularización y anejos como la hipófisis, así como del manejo operatorio y no operatorio del dolor, cualquiera que sea la edad del paciente.

Corresponde por tanto al neurocirujano la prevención, diagnóstico y tratamiento de pacientes adultos o pediátricos con trastornos del sistema nervioso potencialmente quirúrgicos que comprenden la patología del encéfalo, las meninges, el cráneo y sus aportes vasculares, incluyendo las arterias carótidas y vertebrales, la patología de la hipófisis, la patología de la columna vertebral y de la médula espinal y sus meninges, así como la patología de los nervios periféricos en toda su extensión.

**3) OBJETIVOS DEL PROGRAMA**

1. Definir las competencias que debe adquirir el residente a lo largo del periodo

formativo que le habiliten para obtener el título de especialista en Neurocirugía

1. Establecer un sistema de evaluación de la competencia y otro de control y mejora del funcionamiento del propio Programa

**4) ITINERARIO FORMATIVO**

.- Enmarcándose en el proyecto de Troncalidad, la duración total del periodo formativo es de **seis años**

.- Durante los dos primeros años el residente realizará rotaciones por servicios de Cirugía (General, ORL-Maxilofacial, Traumatología u otras; 6 meses), UCI-(2 meses), Anestesia-Reanimación postquirúrgica (1 mes), Neuropatología (2 meses), Neurología-Neurofisiología (3 meses), Neuroradiología (3 meses), y Neurocirugía (6 meses)

.- Durante los cuatro años siguientes permanecerá la mayor parte del tiempo en el servicio de Neurocirugía, si bien realizará dos rotaciones de 3 meses por una sección de neurocirugía pediátrica y por un servicio de neurocirugía nacional o extranjero. Cuando el hospital de origen no disponga de equipamiento en Radiocirugía, el residente realizará además una rotación externa de 1 mes por una Unidad dedicada a esta técnica.

**5) ELABORACIÓN DEL PROGRAMA. DOMINIOS COMPETENCIALES (Competencias nucleares)**

a) **Generación y circulación del proyecto de programa**. En el 2013 un grupo de neurocirujanos comisionados por la SENEC y la Comisión Nacional elaboró un borrador de programa siguiendo los pasos del PGMTB del Reino Unido que después se circuló a los miembros de la sociedad científica (resientes incluidos) para su valoración y mejora. En el intervalo transcurrido se ha revisado la redacción inicial generando la presente propuesta de programa.

**b) Bases** **para la instrucción y evaluación del residente**. La estructura del programa se adhiere al nuevo paradigma de la EBCs, entendidas las competencias como conocimientos, actitudes y aptitudes (conductas y actividades) observables y por tanto, susceptibles de medición. La evaluación repetitiva y secuencial del nivel de competencia es la base de la aplicación y buen funcionamiento del programa.

**c) Mapa de dominios competenciales o competencias nucleares.** Para guiar el proceso de instrucción y evaluación del residente el programa utiliza los ocho dominios competenciales (“core competences”) establecidos por la ACGME (ver Apéndice 1) que se enumeran a continuación:

***Conocimiento médico:*** Incluye el conocimiento ya establecido y el de nueva aparición en ciencias biomédicas, clínicas, epidemiológicas, sociales y de conducta para su aplicación al cuidado del paciente

***Cuidado del paciente*:** Cuidado compasivo, apropiado y efectivo para proporcionar tratamiento y abordar los problemas de salud a nivel individual y comunitario y la promoción de la salud

***Comunicación y relaciones interpersonales*:** Intercambio eficaz de la información con el paciente, sus familiares, colegas, otros profesionalessanitarios y en el trabajo en equipo

***Profesionalismo:*** Compromiso de asumir las responsabilidades profesionales, adherirse a los principio éticos de la práctica clínica, y mostrar sensibilidad para manejar diferentes poblaciones de pacientes (etnias, credos y culturas)

***Aprendizaje basado en la práctica clínica y perfeccionamiento*:** Investigación y evaluación del cuidado que se proporciona al paciente basadas en la valoración y asimilación continuadas de la evidencia científica y mejora, tanto del aprendizaje, como del cuidado del paciente

***Práctica-aprendizaje basada en sistemas*:** Acciones que demuestren conocimiento de la estructura y funcionamiento del marco global del sistema de salud y habilidad para utilizar los recursos del mismo de una manera óptima

***Colaboración interprofesional***. Trabajo en el contexto de un equipo interprofesional para proporcionar la atención más efectiva tanto al paciente individual como a la población

***Desarrollo profesional y personal***. Adquisición de las cualidades necesarias para crecer tanto en el ámbito profesional como en el personal

En el Apéndice 1 de este Programa se adjunta un listado de subcompetencias en estos ocho dominios competenciales. Ya se apuntó que el Conocimiento médico y el Cuidado del Paciente representan la parte principal de la instrucción en las residencias de cirugía, y dado que su adquisición es la más fragmentada a lo largo del periodo formativo, este programa incluye un mapa adicional (ver Anexo 1) en el que se explicitan los listados de subcompetencias en estos dos dominios referidas a tres niveles de desempeño o pericia del residente (básico, medio y elevado). Las competencias en técnica quirúrgica se incluyen en el dominio competencial del Cuidado del Paciente.

**6) LA INSTRUCCIÓN DEL RESIDENTE**

A su llegada a los servicios, y más en particular al Servicio de Neurocirugía, el residente será informado acerca de los métodos de instrucción y evaluación de su actividad clínica y de aprendizaje, y se le facilitará una guía de funcionamiento de la Unidad que contenga instrucciones escritas sobre aspectos tales como: horario laboral, régimen de guardias médicas, normas de admisión de pacientes y funcionamiento del área de hospitalización, quirófanos, departamentos de reanimación y urgencias, sistema de información a los pacientes y familiares, modelos de historia clínica, descripciones de evolución y operatorias, informes de alta, y sistemática de asistencia a sesiones y reuniones científicas.

El presente programa utiliza un modelo de aprendizaje basado en la práctica clínica (trabajo individual y en equipo) y en el estudio personal con adquisición progresiva de responsabilidad en las tareas asistenciales y los procedimientos quirúrgicos (“work-based learning” y “self-directed learning”). Así, la base de la instrucción teórica y práctica del residente es el autoaprendizaje tomado como una competencia más a adquirir y aplicar de por vida (“long-life learning”). Ha de tenerse presente que la retroalimentación(tanto ocasional como programada) tras las actuaciones del residente en la práctica diaria y en las evaluaciones objetivas estructuradas es el componente que, aisladamente considerado, influye más en el aprendizaje.

Los **objetivos generales de la instrucción o formación** incluyen:

1) Formación clínico-quirúrgica básica, que se obtiene participando en las actividades llevadas a cabo en los distintos departamentos, servicios, y unidades multidisciplinarias, que incluyen la asistencia a sesiones interdepartamentales y otros recursos formativos estrechamente relacionados con la Neurocirugía.

2) Formación clínico-quirúrgica especializada basada fundamentalmente en rotaciones o módulos por las diferentes áreas del Servicio de Neurocirugía, e idealmente también por el laboratorio de habilidades quirúrgicas (neuroanatomía y/o experimental).

3) Formación en investigación que es imprescindible en la práctica médica actual, ya que sólo la activa implicación del especialista en la adquisición de nuevos conocimientos cotejados y evaluados con el método científico, asegura una asistencia de calidad y la contribución a la innovación y el progreso de la propia especialidad.

4) Formación como docente (exigencia de compromiso explícito y formación para enseñar a los estudiantes, residentes junior y otros miembros del equipo que cuida del paciente)

5) Formación en bioética, gestión clínica, archivo y distribución de imágenes y aspectos básicos de formación médico-legal.

6) Formación en gestión sanitaria (realización de un proyecto específico sobre sistemas de salud a lo largo de la residencia)

Los **métodos de instrucción**  incluyen:

1. Estudio personal (textos, guías, protocolos, artículos, - PubMed y otros buscadores -, videos, otros recursos)
2. Práctica Clínica en el marco del propio servicio (en diferentes contextos clínicos, incluido el quirófano) y la actividad reglada de equipos multidisciplinarios relacionados con la especialidad
3. Participación en sesiones clínicas de diferentes tipos y ámbitos; incluye tanto las relativas a la presentación de casos por el personal de plantilla y por los residentes, como las sesiones neurorradiológicas, clínico-patológicas, de morbi-mortalidad, “Journal club”, y de planificación de la investigación.
4. Instrucción para la preparación de revisiones sistemáticas, posters y presentaciones orales en sesiones, cursos y congresos
5. Instrucción para la preparación de publicaciones personales o de grupo en diferentes ámbitos
6. Instrucción para la preparación de un trabajo de investigación clínica o básica que pueda ser objeto de la tesis doctoral
7. Instrucción para la participación en ensayos clínicos
8. Instrucción en el laboratorio de habilidades quirúrgicas (neuroanatomía quirúrgica) y las salas de simulación
9. Asistencia a Cursos impartidos en diferentes ámbitos, como los organizados por la SENEC y otros (incluido uno obligatorio de estadística para la investigación).

La SENEC, a través del Comité de Programa y la Comisión de Docencia, facilitará diversas opciones de instrucción adicionales como son, a título de ejemplo, las propuestas por el American College of Surgeons, entre las que pueden estar:

1) Un Curriculum comprehensivo de Cirugía (en nuestro caso sería de Neurocirugía) con módulos básicos cada uno de los cuales integraría: objetivos de aprendizaje, lecturas recomendadas, descripciones del procedimiento, información de los errores más comunes cometidos a abordarlo y su prevención-corrección, videos con realización del procedimiento por un experto, e información para el manejo del módulo

2) Otro curriculum enfocado sobre las competencias en las bases de la cirugía con módulos presentados y resueltos de manera interactiva por internet, tales como el Manejo de las heridas, Balance hidroelectrolítico, Soporte nutricional, Manejo respiratorio, Control del dolor, Evaluación preoperatoria, etc. Cada módulo puede incluir un número de escenarios de casos de 10-15 minutos de duración, en el que el residente es requerido para reconocer los síntomas y signos de varias patologías quirúrgicas, solicitar pruebas de laboratorio, imagen y otras, evaluar los datos, e iniciar las acciones apropiadas; además, cada módulo lleva un feedback que contempla las respuestas correctas e incorrectas junto con materiales de referencia para estudio adicional, y

3) Un banco de videos relacionados con la educación sobre los dominios competenciales de la ACGME (no sólo te técnica quirúrgica).

Estas iniciativas habrán de ser sostenidas por la SENEC a través de la Vocalía o Comisión de Docencia y/o el Comité de Programa; sin embargo, su implementación y uso dependen en gran manera de la dedicación activa de los directores de programa, los tutores y los propios residentes en la búsqueda de módulos y materiales docentes disponibles y en la creación-diseño de otros nuevos. El residente ha de percibir claramente que la realización de este trabajo, encaminado a mejorar la competencia de sus colegas, tiene por sí mismo un alto valor formativo como docentes para quienes lo realizan, y que toca transversalmente al menos cinco de los ocho dominios competenciales (conocimiento, comunicación, profesionalismo, aprendizaje basado en la práctica, desarrollo profesional y personal).

**Instrucción específica en metodología de la investigación, bioética, gestión clínica y práctica docente**. Es recomendable que la formación incluida en este apartado se organice a nivel de Comisión de Docencia local conjuntamente con residentes de otras especialidades, pero cuando ello no sea posible se organizará a través de cursos o sesiones específicas dirigidas desde la SENEC.

Instrucción en **Investigación.**

a) Durante su formación el residente de Neurocirugía debe iniciarse en el conocimiento de la metodología de la investigación que utilizará para la interpretación y preparación de publicaciones y para el diseño y ejecución de uno o más trabajos de investigación, sean estos de tipo observacional o experimental, uno de los cuales podrá dar pie a la presentación de la tesis doctoral. El residente debe adquirir los conocimientos y habilidades que le permitan evaluar críticamente la literatura científica relativa a las ciencias de la salud, generar y verificar hipótesis, diseñar diferentes tipos de estudios (revisiones sistemáticas, entre otros), realizar la recogida de datos y el análisis estadístico, y preparar la elaboración de la discusión y conclusiones que sabrá presentar en forma de comunicación y/o publicación. En todo caso, el residente deberá asistir obligatoriamente a alguno de los Cursos que se imparten sobre Epidemiología y Estadística.

Instrucción en **Bioética,** que contempla:

a) Aspectos de la Relación médico-paciente y otros institucionales:

- Humanismo y Medicina
- Consentimiento informado.
- Consentimiento del menor y del paciente incapacitado.
- Confidencialidad y secreto profesional
- Ética y deontología.
- Comités deontológicos.
- Comités éticos de investigación clínica.

Instrucción en **Gestión Clínica,** que contempla:

a) Aspectos generales:

- Cartera de servicios
- Competencias del especialista en Neurocirugía.
- Funciones del puesto asistencial.
- Organización funcional de un servicio de Neurocirugía.
- Equipamiento básico y recursos humanos.
- Indicadores de actividad.
- Recomendaciones nacionales e internacionales de práctica clínica

b) Gestión de la actividad asistencial:

- Medida de la producción de servicios y procesos
- Sistemas de clasificación de pacientes.
- Niveles de complejidad de los tratamientos neuroquirúrgicos.
- Proyección clínica.

c) Calidad:

- El concepto de calidad en el ámbito de la salud.
- Calidad asistencial: control y mejora. Importancia de la coordinación
- Indicadores, criterios y estándares de calidad.
- Evaluación externa de los procesos en Neurocirugía.
- Guías de práctica clínica.
- Programas de garantía y control de calidad.
- Evaluación económica de tecnologías sanitarias. Análisis coste/beneficio, coste/efectividad y coste/utilidad
- La buena comunicación con el paciente como elemento de calidad de la asistencia.

Instrucción como **Docente,**  que contempla:

- Conocer los nuevos paradigmas docentes de la enseñanza del adulto y los movimientos competencial y de autenticidad en el aprendizaje clínico
- Conocer los instrumentos y técnicas de evaluación empleados en la EBCs (miniCEX, Discusión basada en caso, Observación directa de procedimiento práctico, evaluación 360º, escalas globales de la competencia, “milestones”, y otros; ver Anexo 2)
- Colaborar en el entrenamiento clínico y la evaluación de los estudiantes (si los tuviera a su cargo) y los residentes del servicio

**Realización de guardias**

Durante la primera parte del período formativo (periodo troncal) el residente realizará guardias en los Servicios por los que rote (incluido el de Neurocirugía), asumiendo cometidos asistenciales análogos a los de los residentes que se estén formando en dichos servicios. Durante el periodo específico realizará entre cuatro y seis guardias por mes en el servicio de Neurocirugía.

**Responsables de la Instrucción.** La instrucción del residente implica a todos los miembros del servicio, incluido el tutor, que actuará como coordinador del proceso y asumirá una serie de tareas específicas detalladas más adelante, entre las que destaca controlar la evaluación

**7) ROTACIONES ANUALES y MAPAS DE COMPETENCIAS**

A continuación se explicitan las competencias a adquirir (y actividades a desarrollar) en los seis años de residencia. Ya se apuntó que la adquisición de las competencias se hace de una manera simultánea (todas a la vez) y progresiva a lo largo del periodo de formación, por lo que algunas reaparecen con similar denominación en los listados de años sucesivos del programa. Cada apartado incluye, atomizadas, las subcompetencias genéricas y específicas de los diferentes dominios cuya adquisición se refiere a **tres niveles** que son: bajo (residente junior), medio y avanzado (residente senior) (ver Programa y Anexo 1).

El objetivo de las rotaciones de los **dos primeros años** es adquirir competencias comunes al tronco quirúrgico (principios de la cirugía, cuidado del enfermo crítico y del politraumatizado) y otras relacionadas con las neurociencias básicas y clínicas que son básicas para la formación en Neurocirugía. El residente rotará un total de 10 meses por servicios de Cirugía, UCI y Anestesia-Reanimación, y 14 meses por Neuropatología, Neurología-Neurofisiología, Neuroradiología y Neurocirugía. La asistencia a guardias en el marco del “pool” de residentes representa un recurso de instrucción esencial para el aprendizaje de las competencias generales en cirugía.

**PRIMER AÑO DE RESIDENCIA**

Las rotaciones se realizan por Cirugía (General, ORL o Maxilofacial, Traumatología, Vascular, otras) (6 meses), UCI/Neurocríticos (2 meses), Anestesia-Reanimación (1 mes), y Neuropatología (2 meses) (consultar también Anexo 1)

**Rotaciones por Cirugía-UCI-Anestesia**

En estas rotaciones el residente habrá de adquirir las subcompetencias específicas de Cirugía y Cuidados críticos que se reflejan en la Tabla 1 y en el mapa de Conocimientos y Cuidados de paciente incluido en el apartado de Cuidados Intensivos del Anexo 1.Algunas de las subcomptencias de la Tabla 1 se contemplan ya en el Pregrado. Además, el residente iniciará la adquisición de competencias transversales en los seis dominios competenciales de Comunicación, Profesionalismo, Aprendizaje basado en la práctica, Sistemas de salud, Colaboración interporfesional y Desarrollo profesional-personal que se utilizan en el programa de Neurocirugía y que sedetallan a partir del Segundo año (ver más adelante).

El tutor de residentes del tronco de Cirugía contactará con el tutor de los otros servicios por los que rota el residente para que se apliquen las evaluaciones contempladas en el programa troncal, o en su defecto las referidas en este programa de Neurocirugía (a determinar) (**Anexo 2**). Al finalizar el año el residente cumplimentará los formularios de autoevaluación de la competencia y los de satisfacción y valoración de la actividad docente del staff y el funcionamiento del programa de Neurocirugía. Además, recogerá en su Libro de Residente (o portafolio) todas las evaluaciones

**Rotación por Neuropatología (2 meses)** (consultar también Anexo 1 para competencias de Conocimiento)

**.- Competencia global**: Demostrar conocimiento de neuropatología necesario para el diagnóstico de las enfermedades del sistema nervioso y de la práctica de la neurocirugía.

# .- Competencias de conocimiento (desarrolladas en detalle en Anexo 1):

## *a) Nivel Medio*:

- Neuropatología General:
- Conocer las técnicas disponibles para el examen de muestras quirúrgicas del sistema nervioso central, sistema nervioso periférico, músculo esquelético, y glándulas pineal e hipofisaria y el exámen morfológico del LCR.
- Sistema Nervioso Central:
- Conocer los rasgos histopatológicos macroscópicos y las bases genéticas de las malformaciones congénitas y perinatales y de las demencias y enfermedades degenerativas, fundamentalmente de la enfermedad de Alzheimer, las enfermedades infecciosas y las patologías vasculares, traumáticas, desmielinizantes y neoplásicas.
- Sistema Nervioso Periférico:
- Conocer los rasgos histopatológicos mayores y las bases genéticas y bioquímicas de los trastornos de los nervios periféricos más frecuentes (neuropatía diabética, síndrome de Guillain-Barre) y de las neoplasias de los nervios periféricos
- Hipófisis y Pineal:
- Conocer los rasgos histopatológicos mayores de las lesiones de la hipófisis y la glándula pineal
- Cráneo y columna:
- Conocer los rasgos histopatológicos mayores de las lesiones craneales, y raquimedulares

**SEGUNDO AÑO DE RESIDENCIA**

.- Incluye rotaciones por Neurología-Neurofisiología (3 meses), Neuroradiología (3 meses), y Neurocirugía (6 meses).

.- Durante este año el residente abordará la adquisición de los conocimientos de **Neuroanatomía y Neurofarmacología** explicitados en el **Anexo 1.**

.- El tutor de residentes de Neurocirugía contactará con el tutor de los servicios de Neurología y Neuroradiología para que se apliquen las evaluaciones contempladas en el programa de Neurocirugía (**Anexo 2**)

.- Al finalizar el año el residente cumplimentará los formularios de autoevaluación de la competencia y los de satisfacción y valoración de la actividad docente del staff y el funcionamiento del programa de Neurocirugía que recogerá en su Libro de Residente, junto con las evaluaciones que le hayan sido administradas por el tutor y otros miembros del equipo en relación con la rotación de 6 meses por Neurocirugía.

**Rotación por Neurología-Neurofisiología (3 meses**) (consultar también

Anexo 1 para competencias de Conocimiento)

La rotación suministra al residente experiencia clínica en un amplio abanico de enfermedades neurológicas incluyendo la enfermedad cerebrovascular y el ictus, las condiciones neurodegenerativas, epilepsia, trastornos del movimiento, enfermedades neuromusculares, y permite su exposición a la electroencefalografía y electromiografía y otras técnicas neurofisiológicas. En esta rotación el residente puede iniciar la consulta de tratados relacionados con la neurocirugía. Además de asistir a las sesiones del servicio de Neurología, el residente acudirá a la sesiones interdisciplinarias de neurooncología y patología neurovascular.

**Competencias a adquirir en la rotación en Neurología:**

- Comprender los mecanismos causales de las enfermedades neurológicas incluyendo la patología del músculo y el nervio periférico
- Manejar las enfermedades neurológicas agudas y crónicas más comunes.
- Conocer el manejo en régimen ambulatorio del paciente con enfermedades neurológicas, incluido el niño.
- Diagnosticar y manejar el ictus isquémico y hemorrágico.
- Interpretar electroencefalogramas, electromiogramas, estudios de conducción nerviosa y otros neurofisiológicos.
- Interpretar estudios del líquido cefalorraquídeo y análisis serológicos en relación a enfermedades neurológicas.

**Rotación por Neuroradiología – Intervencionismo Endovascular (3**

**meses)** (consultar también Anexo 1 para competencias de Conocimiento)

El residente es expuesto a la instrucción teórica directa, lecturas seleccionadas y la enseñanza práctica. Además asiste a las sesiones interdisciplinarias de neuroradiología/ neurología/ neurocirugía/ neurooncología/ neuropatología/cirugía ortopédica sobre columna, que se realicen. También asistirá a las sesiones propias de la sección de neuroradiología y completará la lectura de textos seleccionados de neuroradiología.

**Competencias a adquirir en la rotación por Neuroradiología:**

- Comprender los fundamentos prácticos de las técnicas actuales de neuroradiología incluyendo la placa simple, TC, RM, PET, SPECT, RM funcional y angiografía.
- Conocer el uso apropiado, eficiente y coste-efectivo de todos los estudios de imagen.
- Ser capaz de interpretar los estudios neuroradiológicos de Rx simple, ultrsonido, TC, RM y angiografía cerebral.
- Conocer el papel de la neuroradiología intervencionista en el diagnóstico y tratamiento de la enfermedad neurológica, incluyendo el manejo endovascular de problemas neurovasculares.

**Rotación por Neurocirugía (6)** (consultar también Anexo 1)

El residente permanecerá 6 meses en el Servicio de Neurocirugía en el que después completará su formación. Así, tomará contacto directo con la estructura física del Servicio (área de hospitalización, quirófanos, policlínica, área de urgencias y servicios relacionados, como radiodiagnóstico y otros), y con el personal facultativo y auxiliar del mismo, en especial con los residentes, y conocerá la dinámica de trabajo y las actividades científicas y docentes que se lleven a cabo.

En este periodo de inmersión en la especialidad su formación y evaluación será guiada por el programa basado en competencias que utiliza el mapa de dominios competenciales preconizado por el ACGME en los EEUU.

**Competencias a adquirir en las rotaciones del Segundo año:**

Ya se ha apuntado que la adquisición de las subcompetencias en general, y más particularmente las relacionadas con los dominios de Comunicación, Profesionalismo, Aprendizaje basado en la práctica, Práctica basada en sistemas, Colaboración interprofesional y Desarrollo profesional, se alcanza en los sucesivos años de Residencia iniciándose en el primer año y completándose en el 6º.

***Cuidado del paciente****:*

- - Realizar con eficiencia la historia clínica neurológica-neuroquirúrgica (entrevista clínica semiestructurada) y la exploración física del paciente documentándolas de manera comprensible para terceros
  - Generar diagnósticos diferenciales apropiados en las patologías más comunes
  - Empezar a familiarizarse con el ambiente del quirófano neuroquirúrgico incluyendo el instrumental, el uso del microscopio quirúrgico y los sistemas de navegación.
  - Asistir a la realización de procedimientos neuroquirúgicos diversos y ayudar en algunos básicos incluyendo trépanos, drenajes ventriculares y laminectomías y craneotomías simples bajo supervisión directa.
  - Aprender a utilizar de la manera más eficiente el tiempo y a priorizar los cuidados clínicos

Interactuando con los pacientes y sus familiares

- - Reconocer cuando es necesaria la ayuda de miembros senior del equipo y solicitarla de manera oportuna
  - Identificar los enfermos graves y con potencial posibilidad de deterioro

* El nivel de **competencia quirúrgica** del residente de Segundo año se sitúa entre el definido como junior o básico utilizado en el Anexo 1 que describe las subcompetencias a alcanzar en las diversas cirugías.

- ***Conocimiento médico:***
  - Ampliar el conocimiento de los fundamentos de neuroanatomía, neurofisiología, y neuropatología adquiridos durante el primer año y acceder a los de neurología-neurofisiología, neuroradiología (ver ANEXO 1) y neurocirugía recurriendo a lecturas y textos específicos recomendados y asistiendo a sesiones clínicas y clinicopatológicas (UCI incluidas), y al laboratorio de disección craneal y/o de base de cráneo.
  - Familiarizarse con los requerimientos y guías del programa de residencia
- ***Comunicación y relaciones interpersonales:***
  - Aplicar los principios básicos de la comunicación a la práctica clínica en la relación con los pacientes, familiares, cuidadores y resto del personal sanitario
  - Presentar de forma sintética y coherente la información clínica a los miembros senior del equipo clínico.
  - Valorar el impacto de la enfermedad en el paciente y su familia incrementando la capacidad de empatía para aliviar el sufrimiento
  - Conocer y comprender la jerarquía del personal médico y la distribución de responsabilidades entre los miembros del equipo medico
  - Ser capaz de presentar casos clínicos de manera sucinta.
- ***Profesionalismo:***
  - Conocer los fundamentos de la bioética y los valores de la profesión para aplicarlos en la práctica profesional.
  - Asumir el compromiso de proporcionar tratamiento compasivo a los pacientes respetando su dignidad, privacidad y derechos (incluido el de tomar decisiones), independientemente de la edad, sexo, raza, orientación sexual, religión, marco cultural y creencias acerca de la salud, estatus socioeconómico, ciudadanía, pronóstico de su enfermedad y capacidad para pagar la atención médica
  - Comprender y atender los principios éticos que subyacen a las decisiones relacionadas con el principio y el final de la vida (límites del esfuerzo terapéutico), la genética y las tecnologías de biología molecular
  - Conocer los aspectos éticos y legales relacionados con la atención a menores y discapacitados, y con la prescripción de fármacos
  - Conocer el funcionamiento de los Comités de Ética Asistencial y de Investigación
  - Mostrar una conducta profesional en el trabajo diario modélica para la sociedad, incluyendo demostraciones consistentes de honestidad, integridad y fiabilidad en todas las interacciones con el paciente, sus familiares, los colegas y otros trabajadores sanitarios.
  - Tratar a los enfermos y sus familiares, los colegas y el resto del personal sanitarios con respeto y empatía
- ***Aprendizaje y desarrollo profesional personal basado en la práctica y mejora:***
  - Aplicar el conocimiento adquirido al manejo diario de los pacientes (integración de los conocimientos en la experiencia clínica) usando múltiples fuentes de información para abordar la resolución de problemas
  - Adoptar un abordaje científico a los problemas médicos y mejorar continuamente el propio conocimiento y habilidades clínicas mediante el estudio autodirigido y la integración adecuada de los datos obtenidos de diversas fuentes y con distintos instrumentos
  - Tomar las decisiones basándose en la evidencia científica más que en opiniones, sin dejar de reconocer la importancia de la experiencia clínica individual y el arte médico
  - Comprender la importancia crítica de la investigación y desarrollar habilidad para revisar de manera crítica artículos científicos
  - Mejorar el desempeño clínico basándose en la reflexión, la autoevaluación y la aceptación o apertura a la retroalimentación proporcionada por otros
  - Indicar e interpretar exploraciones complementarias y saber consultar con el especialista correspondiente
  - Empezar a utilizar críticamente las tecnologías de la información y las fuentes de la información clínica en el desempeño profesional
  - Conocer las metodologías de instrucción y evaluación del sistema de enseñanza basado en competencias
  - Desarrollar habilidad para aprender de los errores
- ***Practica-aprendizaje basada en sistemas:***
  - Adquirir conciencia de la necesidad de desarrollar la práctica clínica de una manera eficiente y coste-efectiva.
  - Reconocer y ser capaz de trabajar con eficiencia en los diferentes sistemas de salud para defender y proporcionar cuidado de calidad
  - Proteger la confidencialidad de la información privada obtenida de pacientes, colegas y otros, demostrando entendimiento y adherencia a las normativas de protección de datos vigentes
  - Incorporar el conocimiento derivado de los diferentes abordajes de búsqueda y fuentes de información a la organización, financiación y la dispensa del cuidado sanitario
  - Conocer las bases de la planificación, administración y organización sanitaria a nivel estatal y autonómico
  - Empezar a utilizar eficientemente los recursos disponibles y los dispositivos sanitarios especiales tales como hospital de día, cuidados paliativos, etc
  - Conocer y empezar a aplicar las normas de seguridad del paciente
  - Conocer las principales fuentes de protocolos y guías de práctica clínica
  - Usar racionalmente los fármacos teniendo en cuenta la relación coste-beneficio
  - Conocer las bases para la notificación de reacciones adversas al Sistema Español de Farmacovigilancia y para la notificación de las enfermedades de declaración obligatoria
  - Conocer los principios básicos de codificación según normativa internacional (CIE)
  - Utilizar los sistemas de registros sanitarios e interpretar los indicadores más frecuentemente empleados del sistema de información
- ***Colaboración interprofesional***
  - Trabajar con los otros profesionales de la salud para mantener un ambiente de respeto mutuo, dignidad y confianza
  - Conocer el “role” personal y el de los demás colegas y profesionales (e.g. las enfermeras) para coordinarse con ellos en la resolución de las necesidades sanitarias de los pacientes y la mejora de la atención sanitaria.
  - Asumir diferentes “roles” y de participación en el trabajo de los equipos multidisciplinarios y potenciar el funcionamiento de estos para mejorar la salud del paciente individual y de la población
  - Participar en la educación de colegas, estudiantes y otros profesionales sanitarios a los pacientes y al público en general
- ***Desarrollo profesional y personal***
  - Conformar la propia identidad profesional cuidando de la situación personal (salud, hábitos y habilidades) y diseñando un plan para el desarrollo personal
  - Planificar las necesidades de formación generando un plan personal de aprendizaje de acuerdo con el tutor docente
  - Aplicar las medidas preventivas de protección de riesgos laborales y enfermedades profesionales (incluye la protección radiológica)
  - Reconocer la incertidumbre del proceso de toma de decisiones incluyendo la habilidad para cuantificar y comunicar el nivel o grado de certidumbre asociado con los ítems específicos de la información científica y clínica
  - Asumir que la ambigüedad forma parte de la medicina clínica y responder utilizando los recursos apropiados y asumiendo la incertidumbre
  - Demostrar madurez y flexibilidad para adaptarse a los cambios y mostrarse digno de confianza para conseguir que colegas y los pacientes se sientan seguros con su trabajo
  - Empezar a adquirir las habilidades de liderazgo que mejoran la dinámica de equipo, el ambiente de aprendizaje y/o la atención sanitaria

**TERCER AÑO DE RESIDENCIA**

**Rotación por Neurocirugía (12 meses).**

.- Al igual que en los restantes años de la residencia, el residente pasará visita por el conjunto del servicio y examinará a los pacientes, obtendrá la información apropiada y la revisará, presentando un sumario al staff. De la misma manera, el miembro del staff observará al residente y supervisará su interacción no sólo con el staff, sino con otros equipos médicos implicados en el manejo del paciente

.- Al finalizar el año el residente cumplimentará los formularios de autoevaluación de la competencia y los de satisfacción y valoración de la actividad docente del staff y el funcionamiento del programa que recogerá en su Libro de Residente, junto con las evaluaciones que le hayan sido administradas por el tutor, el resto del staff y otros miembros del equipo.

.- Antes de finalizar el año pasará un examen de conocimientos (ecuador de la residencia) a nivel local o nacional. De no superarlo en primera instancia, el residente dispondrá de un año para volver a presentarse.

**Competencias a adquirir en el 3er año:**

- ***Cuidado del paciente****:*
  - Realizar una historia y el examen físico de casos complejos de manera eficiente
  - Formular diagnósticos diferenciales y planes de tratamiento para la mayoría de los pacientes neuroquirúrgicos
  - Emplear de manera eficiente y coste-efectiva los estudios de laboratorio y de imagen apropiados
  - Actuar como parte de un equipo de residentes con responsabilidad primaria en un servicio de neurocirugía universitario.
  - Reconocer y formular el plan de tratamiento de las urgencias neuroquirúrgicas más comunes
  - Familiarizarse por completo con el quirófano neuroquirúrgico y todas sus dotaciones, incluyendo los sistemas de navegación.
  - Realizar procedimientos básicos (ventriculostomías, laminectomías, craneotomías simples) bajo supervisión directa o indirecta o incluso independiente en algunos casos
  - Asistir a procedimientos de radiocirugía, familiarizándose con los medios necesarios para llevarlos a cabo
  - Iniciar su adiestramiento en procedimientos endovasculares
  - Ayudar en procedimientos neuroquirúrgicos mayores y realizar algunas partes de estos procedimientos bajo supervisión directa (ver a continuación)

**Competencias quirúrgicas:**

A continuación se describe la relación de subcompetencias a alcanzar en el nivel junior (básico) en los apartados de cirugía craneal, raquídea y otras que vienen explicitadas en los niveles básico y medio utilizados en el Anexo 1 donde se consideran las patologías mayores (tumoral, vascular, etc)

*Residente de nivel junior de cirugía craneal*

- Participar en la cirugía tumoral incluyendo la cirugía directa y la biopsia estereotaxica del glioma, la cirugía del meningioma, la cirugía transesfenoidal y la de otros tumores
- Participar en la cirugía neurovascular incluyendo:

- Manejo global de la hemorragia subaracnoidea y la interpretación de la angiografía

cerebral.

- Asistir a la cirugía de los aneurismas y MAVs.

- Familiarizarse con las técnicas endovasculares.

- Participar en la neurocirugía funcional incluyendo la estimulación cerebral profunda y el tratamiento de la epilepsia del adulto.
- Participar en el manejo de una amplia variedad de otras patologías neuroquirúrgicas incluyendo:

- Colocar en la mesa quirúrgica al paciente en un amplio rango de operaciones craneales.

- Realizar la evacuación de hematomas intracraneales bajo supervisión.

- Abrir y cerrar la vía de abordaje en un amplio rango de operaciones craneales bajo

supervisión

*Residente de nivel junior de cirugía* *raquídea*

- - Aprender el manejo básico del traumatizado raquídeo con y sin lesión medular asociada

y el manejo quirúrgico de la enfermedad degenerativa de la columna incluyendo las técnicas mínimamente invasivas y de reconstrucción espinal que conllevan:

- - Dominar la colocación del paciente en una amplia gama de operaciones de la columna
  - Abrir y cerrar la vía quirúrgica en un amplio rango de cirugías de columna bajo supervisión.
  - Realizar laminectomías básicas y exposiciones espinales bajo supervisión.
  - Ayudar en casos de instrumentación espinal y discectomías cervicales anteriores o posteriores
  - Ayudar en intervenciones para estabilizar la columna

*Residente de nivel junior de neurotraumatología*

El residente participará en el manejo hospitalario del politrauma trabajando como parte del equipo que se ocupa de la evaluación del paciente en urgencias y del cuidado postoperatorio en la Unidades de Cuidados Intensivos-Reanimación. Las competencias incluyen:

- Dominar los procedimientos relacionados con la Unidad de Cuidados Intensivos tales como:

- Ventriculostomías y colocación de sistemas de neuromonitorización invasiva tales como PtiO2, SJvO2

- Manejo de la presión intracraneal.

- Manejo de la ventilación invasiva y traqueostomías

- Manejo de la nutrición parenteral y la coagulopatía

- Desarrollar la habilidad para obtener opinión médica o quirúrgica adecuadas de otros colegas y de tomar decisiones independientes sobre el manejo de los pacientes con traumatismo craneoencefálico.
- Demostrar un claro sentido de priorización en relación a los tiempos de urgencia e intervención médica o quirúrgica, y reconocer el impacto de las condiciones sistémicas en dicha priorización
- Adquirir experiencia quirúrgica para:

- Realizar trépanos de rutina o complicados para el drenaje del sistema ventricular o del espacio subdural.

- Colocar drenajes lumbares.

- Realizar craneotomías para hematomas subdurales, epidurales e intracerebrales bajo

supervisión.

-Realizar craneotomías para descompresión bajo supervisión.

*Residente de nivel junior de radiocirugía*

El residente que se forme en hospitales que carezcan de equipamiento para la práctica de Radiocirugía deberá rotar durante un periodo de entre 4 y 6 semanas por una Unidad de Radiocirugía externa en la que se traten un alto número de pacientes (esta rotación puede hacerse entre los meses finales del tercer año o comienzos del cuarto año).

- Participar en la colocación y retirada de la guía de estereotaxia y las distintas guías de coordenadas en función de las pruebas de imagen necesarias.
- Asistir al proceso de planificación del tratamiento de las patologías (neurinomas, adenomas, meningiomas, MAVs…)
- Identificar y delimitar los órganos en riesgo una vez fusionadas las técnicas de imagen
- Identificar y delimitar la diana terapéutica
- Familiarizarse con los conceptos básicos del tratamiento radioquirúrgico como colimador, isocentro, dosis e isodosis, PTV y GTV
- Asistir al procedimiento de administración del tratamiento, familiarizándose con los distintos elementos de los aceleradores lineales o equipos de gammaknife.

- ***Conocimiento médico:***
  - Ampliar los conocimientos en neurociencias y los fundamentos científicos del cuidado neuroquirúrgico con lecturas específicas (Anexo 1).
  - Conocer las bases y las indicaciones del tratamiento radioterápico (Anexo 1)
  - Referirse continuamente a la literatura neuroquirúrgica y aplicar datos empíricos a problemas clínicos.
- ***Comunicación y relaciones interpersonales:***
  - Abordar la comunicación en situaciones difíciles o cambiantes tales como dar malas noticias, preguntar por la historia sexual, abordar pacientes agresivos o difíciles, inmigrantes etc
  - Interactuar con sentido y de forma compasiva con familiares y pacientes.
  - Comunicarse efectivamente con los residentes senior y el staff de neurocirugía y de otros servicios.
  - Adquirir agilidad y precisión en la elaboración de la transferencia de información clínica sobre los pacientes ente en los cambios de turno diarios o entre guardias (“handoffs”)
  - Trabajar de forma efectiva en los diferentes equipos multidisciplinares
  - Presentar casos en sesiones clínicas, alguna revisión bibliográfica y al menos un poster o comunicación oral en un foro nacional o internacional
  - Publicar al menos un trabajo científico en una revista de ámbito nacional o internacional
- ***Profesionalismo:***
  - Demostrar sensibilidad, integridad y madurez en todas las interacciones profesionales.
  - Aceptar de manera definitiva el compromiso de poner siempre los intereses del paciente por encima de los propios
  - Respetar en todas las interacciones clínicas la confidencialidad, dignidad, y valores culturales y religiosos del paciente, incluso cuando estos últimos chocan con los de uno mismo
  - Tomar conciencia de las amenazas para el profesionalismo médico planteadas por los conflictos de intereses inherentes a diversos acuerdos financieros y organizativos en la práctica de la medicina
  - Aceptar la responsabilidad adjudicada en cada momento y demostrar fiabilidad.
  - Conocer los aspectos éticos relacionados con el manejo de la información y documentación y la historia clínica (confidencialidad y secreto profesional)
  - Tomar conciencia de la propia vulnerabilidad al estrés y la influencia de este sobre la capacidad para tratar al paciente
  - Desarrollar habilidad para identificar y manejar adecuadamente las conductas irregulares, no éticas o ilegales de los miembros del equipo, y entender cuando y cómo deben ser reportadas dichas desviaciones de conducta
- ***Aprendizaje y desarrollo profesional personal basado en la práctica y mejora:***
  - Mejorar la aplicación del conocimiento neurológico a la práctica clínica.
  - Aplicar estrategias para conseguir la mejor adherencia del paciente a los tratamientos prescritos
  - Usar de manera rutinaria búsquedas de la literatura basadas en Pubmed y otros servidores para mejorar el cuidado de los enfermos
  - Ampliar las habilidades para la lectura, interpretación crítica y preparación de artículos científicos y manuscritos
  - Ser capaz de generar hipótesis y articular estrategias para verificarlas
  - Aplicar los principios del manejo de la bioestadística médica y epidemiología clínica para el análisis de datos
  - Supervisar a los estudiantes de medicina en el cuidado básico de los enfermos.
- ***Practica-aprendizaje basada en sistemas:***
  - Mejorar el conocimiento de los diferentes sistemas de provisión de servicios médicos en los distintos contextos sanitarios y hospitales, y asumir los desafíos específicos que plantea cada sistema.
  - Trabajar con responsabilidad en equipos interprofesionales para aumentar la seguridad del paciente y mejorar la calidad del cuidado médico
  - Conocer y participar en la autoevaluación global y sistemática de la organización del sistema de salud (modelos de calidad)
  - Considerar los aspectos de coste-efectividad del cuidado de los pacientes de forma que no comprometa la calidad del cuidado médico; ello incluye:

- Entender el manejo pre y postoperatorio de los pacientes incluyendo los estudios de

laboratorio y radiológicos.

- Entender el espectro global de la enfermedad neuroquirúrgica (incluyendo el manejo

crítico del paciente neuroquirúrgico) y las indicaciones y contraindicaciones de la cirugía.

- Entender el abanico de técnicas quirúrgicas incluyendo el equipo quirúrgico y los

abordajes

- ***Colaboración interprofesional***
  - Asumir responsabilidad progresiva en la participación en las sesiones clínicas, seminarios de residentes, “journal club”, y sesiones de morbi-mortalidad*.*
  - Mejorar la adquisición de las subcompetencias de este dominio contempladas en el 2º año
- ***Desarrollo profesional y personal***
  - Reconocer y aceptar las propias limitaciones a nivel intelectual, práctico y emocional y en el conocimiento y habilidad clínica para ser capaz de pedir ayuda en caso necesario.
  - Ser capaz de responder de forma adecuada al estrés
  - Mejorar la adquisición de las subcompetencias de este dominio contempladas en el 2º año

**CUARTO AÑO DE RESIDENCIA**

**Rotación por otros servicio de Neurocirugía extranjero o nacional (3 meses). Rotación por Neurocirugía (9 meses).** La rotación por el servicio externo se elegirá por el propio residente en función de sus preferencias de superespecialización que a esta altura de la residencia ya suelen estar perfiladas.

.- El residente mejorará su autonomía en el pase de visita, la evaluación de los pacientes y la transmisión de la información a los residentes senior y los miembros del staff y los componentes de otros equipos del hospital.

.- Al finalizar el año el residente cumplimentará los formularios de autoevaluación de la competencia y los de satisfacción y valoración de la actividad docente del staff y el funcionamiento del programa que recogerá en su Libro de Residente junto con las evaluaciones que le hayan sido administradas por el tutor, el resto del staff y otros miembros del equipo.

**Competencias a adquirir durante el 4º año**

- ***Cuidado del paciente:***
  - Mejorar en la comprensión y el cuidado de los pacientes con patologías craneales y raquídeas
  - Realizar una historia clínica y exploración neuroquirúrgica dirigida en pacientes neuroquirúrgicos pediátricos de forma eficiente.
  - Formular el diagnóstico y plan de tratamiento en pacientes pediátricos.
  - Incrementar el nivel de responsabilidad en el cuidado de pacientes en la unidad de reanimación y de cuidados intensivos.
  - Dominar el uso de todo el instrumental neuroquirúrgico, incluyendo el microquirúrgico, el microscopio quirúrgico, los sistemas de navegación y de imagen disponibles en el quirófano
  - Dominar la colocación del paciente en la práctica totalidad de las intervenciones.
  - Realizar procedimientos neuroquirúrgicos seleccionados incluyendo laminectomías, craneotomías simples y derivaciones ventriculoperitoneales bajo supervisión limitada, o incluso de forma independiente en algunos casos.
  - Actuar como ayudante en procedimientos neuroquirúrgicos complejos y realizar partes mayores de dichos procedimientos bajo supervisión directa.
  - Mejorar su adiestramiento en procedimientos endovasculares
  - Completar su participación en procedimientos radioquirúrgicos, ayudando en las distintas etapas de los mismos (ver a continuación)

**Competencias quirúrgicas:**

A continuación se describe la relación de subcompetencias a alcanzar en el nivel medio en los apartados de cirugía craneal y raquídea. Esta descripción se complementa y completa con la relación de las subcompetencias explicitadas en el nivel medio utilizado en el Anexo 1 que considera las patologías mayores (tumoral, vascular, etc)

*Residente de nivel medio en cirugía craneal*

- Dominar las bases de la neurooncología y conocer el impacto del cáncer en el sistema nervioso central y el esqueleto axial, recurriendo a lecturas recomendadas y la interacción con el staff y con equipos médicos de otras disciplinas implicadas
- Dominar las bases de la patología cerebrovascular cerebral y su manejo en cuidados intensivos y el quirófano
- Dominar las bases de la patología de la epilepsia y de los trastornos del movimiento en el adulto y su manejo quirúrgico.
- Actuar como primer cirujano, con supervisión del staff o del residente senior, en intervenciones que incluyen:
  - Craneotomía para metástasis o tumores sencillos primarios.
  - Biopsia estereotáxica.
- Actuar como cirujano ayudante, pudiendo realizar partes significativas del procedimiento en cirugías más complejas, que incluyen:

- Resección de tumores complejos de la base craneal.

- Resección de tumores cerebrales en localizaciones profundas o complejas.

- Uso avanzado del neuroendoscopio.

- Resección de tumores cerebrales en áreas elocuentes usando mapeo cortical.

- Craneotomías para aneurismas cerebrales.

- Acceso transesfenoidal hacia la región sellar y perisellar.

*Residente de nivel medio en cirugía raquídea*

- Desarrollar un juicio definitivamente sólido y maduro acerca del espectro de problemas encontrados en la patología raquídea
- Demostrar una comprensión sólida de las estrategias quirúrgicas y los abordajes para las lesiones y la patología raquídea común y la infrecuentes
- Mostrar un conocimiento sólido y detallado de las indicaciones y la interpretación del “armamentario” neuroradiológico disponible para el manejo de estas patologías
- Supervisar a los residentes junior y a los estudiantes en el cuidado diario de los pacientes
- Participar en las consultas ambulatorias de patología raquídea
- Realizar los siguientes procedimientos bajo supervisión:

- Colocar un halo.

- Realizar una discectomía cervical con fusión anterior.

- Ayudar en una descompresión para un Chiari.

- Ayudar en la realización de una corporectomía cervical/torácica/lumbar e

instrumentación.

- ***Conocimiento médico***:
  - Ampliar el conocimiento sobre neurociencia básica y clínica y la patología neuroquirúrgica con lecturas recomendadas y otras seleccionadas personalmente (Anexo 1)
  - Mejorar el conocimiento de las indicaciones y planificación de los principales (o más comunes) procedimientos radioquirúrgicos (tumores, malformaciones vasculares, trastornos funcionales)
- ***Comunicación y relaciones interpersonales****:*
  - Aconsejar de manera eficiente a pacientes y familiares acerca de los riesgos y beneficios de las opciones de tratamiento
  - Plantear de manera competente la participación o inclusión del paciente en un ensayo clínico
  - Solicitar de manera apropiada la donación de órganos para trasplante
  - Mejorar la comunicación con los residentes junior y senior y el staff de neurocirugía y de otros servicios.
  - Comenzar a demostrar liderazgo como miembro de un equipo de neurocirugía
  - Presentar revisiones detalladas de temas neuroquirúrgicos o básicos en las sesiones generales
  - Presentar uno o más posters o comunicaciones orales en un foro nacional o internacional
  - Publicar al menos un trabajo científico en una revista con revisión por pares de ámbito nacional o internacional
- ***Profesionalismo****:*
  - Mejorar la adquisición de las subcompetencias incluidas en este dominio en años anteriores
  - Reconocer el deterioro de la conducta profesional de uno mismo y controlar las reacciones personales ante el paciente y manejándolas en su beneficio
  - Demostrar conocimiento y conducta acordes con el más alto estándar en investigación y práctica clínica, incluyendo la actitud compasiva, humanismo, y acciones éticamente apropiadas en todas las ocasiones
  - Completar la asunción de responsabilidad en relación con la participación en las sesiones clínicas, seminarios de residentes, “journal club”, y sesiones de morbi-mortalidad.
- ***Aprendizaje basado en la práctica y mejora***:
  - Completar la habilidad para aplicar el conocimiento neurológico y las lecturas de la literatura a la práctica clínica diaria y planificar el estudio personal partiendo de ésta para mejorar el cuidado de los pacientes
  - Analizar sistemáticamente la propia práctica usando métodos de mejora de la calidad para la toma de las decisiones clínicas
  - Mejorar el uso de la tecnología de la información para mejorar el autoaprendizaje y facilitar la instrucción de residentes junior y los estudiantes
  - Ampliar las habilidades para la lectura crítica, interpretación y preparación de artículos científicos y manuscritos para usarla en presentaciones en el “journal club” y otras sesiones.
  - Demostrar habilidad para generar hipótesis de investigación y formular preguntas para verificarlas
- ***Practica-aprendizaje basada en sistemas****:*
  - Participar en programas de educación de pacientes con especial atención a la promoción de actitudes preventivas
  - Asistir a reuniones mensuales con miembros del equipo y de técnicos de la administración en las que se discute la utilización coste-efectiva de los recursos
  - Participar en la identificación de los errores del sistema de salud y la implementación de las posibles correcciones
- ***Colaboración interprofesional***
  - Mejorar la adquisición de las subcompetencias de este dominio contempladas en el 3er año
- ***Desarrollo profesional y personal***
  - Mejorar la adquisición de las subcompetencias de este dominio contempladas en el 3er año
  - Trabajar en equipo con los miembros del staff y los residentes senior para realizar presentaciones en el journal club y otras sesiones.

**QUINTO AÑO DE RESIDENCIA**

**Rotaciones por Neurocirugía pediátrica (3 meses) y Neurocirugía de adultos (9 meses)**

.- El tutor de Neurocirugía se ocupará de que le sean pasadas al residente las evaluaciones durante su rotación en neurocirugía pediátrica.

.- Al finalizar el año el residente cumplimentará los formularios de autoevaluación de la competencia y los de satisfacción y valoración de la actividad docente del staff y el funcionamiento del programa que recogerá en su Libro de Residente junto con las evaluaciones que le hayan sido administradas por el tutor, el resto del staff y otros miembros del equipo.

**Competencias a adquirir durante el 5º año:**

- ***Cuidado del paciente****:*
  - Dirigir el manejo diario de los pacientes neuroquirúrgicos incluyendo los ingresados en la unidad de cuidados intensivos y formular los planes de diagnóstico y tratamiento.
  - Asumir la responsabilidad primaria de las consultas neuroquirúrgicas, incluyendo la neurotraumatología, neurovascular y otros pacientes críticamente enfermos.
  - Llegar a dominar las técnicas neuroquirúrgicas más sofisticadas, incluyendo la disección microquirúrgica y la instrumentación raquídea
  - Realizar procedimientos neuroquirúrgicos básicos y de complejidad media sin supervisión directa y supervisar a los residentes junior en la realización de dichos procedimientos.
  - Completar adiestramiento en procedimientos endovasculares para el nivel del neurocirujano
  - Actuar como primer cirujano de procedimientos neuroquirúrgicos mayores y realizar porciones mayores de dichos procedimientos bajo supervisión directa.
  - Comenzar a demostrar un papel de liderazgo como miembro de un equipo de neurocirugía.

**Competencias quirúrgicas:**

A continuación se describe la relación de subcompetencias a alcanzar en los niveles medio y avanzado (senior) en diferentes apartados de cirugía que hay que complementar con la relación de subcompetencias explicitadas en los mismos niveles medio y avanzado del Anexo 1 donde se consideran las patologías mayores (tumoral, vascular, etc)

*Residente de nivel medio-avanzado de cirugía craneal*

- Completar las habilidades para realizar los procedimientos neuroquirúrgicos de complejidad media tales como la evacuación de hematomas epidurales, subdurales e intracerebrales, resección de tumores superficiales y biopsia estereotáctica sin necesidad de supervisión
- Realizar partes significativas de, o en algunos casos la cirugía completa en pacientes con patologías tumoral, vascular, columna, funcional y epilepsia que incluyen:
  - *Vascular*:
    - Cirugía de aneurismas
    - Cirugía de la carótida.
    - Técnicas endovasculares.
  - *Tumoral:*
    - Colocación, planificación y exposición de tumores supra e infratentoriales.
    - Uso de técnicas de mapeo neurofisiológico y ayudas de navegación en la cirugía.
    - El residente deberá realizar sin supervisión:
      - . Resección de metástasis y tumores superficiales.
      - . Resección de meningioma de la convexidad.
      - . Resección transesfenoidal de tumores hipofisarios.
  - *Funcional*:
    - Colocación de guía estereotáctica para neurocirugía funcional, incluyendo el cálculo de coordenadas y trayectorias.
    - Colocación de electrodos.
    - Tratamientos percutáneos para neuralgia del trigémino.
    - Colocación de catéter intratecal y bomba de infusión para el tratamiento del dolor.

*Residente de nivel medio-avanzado de cirugía de columna*

- Desarrollar un juicio definitivamente sólido y maduro acerca del espectro de problemas encontrados en la patología raquídea
- Delegar responsabilidad sobre los cuidados del paciente en los residentes junior y a los estudiantes de medicina comprobando su implementación adecuada por parte de estos
- Realizar los siguientes procedimientos bajo supervisión:

- Instrumentación cervical posterior incluyendo una fijación occipito-cervical

- Reconstrucción-fusión espinal con todo el abanico de posibles instrumentaciones

posteriores: Tornillos transpediculares lumbares y torácicos, instrumentación a las

masas laterales cervicales, técnicas mínimamente invasivas

- Resección de masas extradurales

- Abordajes intradurales para algunas neoplasias o syrinx.

*Residente de nivel medio-avanzado en neurocirugía pediátrica*

- Adquirir una comprensión profunda y práctica de un amplio rango de patologías neuroquirúrgicas en el niño que incluyen:

- Dominar el examen neurológico del niño y aprender los principios del manejo

neuroquirúrgico de los pacientes pediátricos

- Asistir y presentar casos en la sesiones de neurocirugía pediátrica.

- Conocimiento fundamental del manejo en la UCI pediátrica, incluyendo el cuidado

neonatal básico desde una perspectiva neuroquirúrgica.

- Participar en la consulta de neurocirugía pediátrica general y de craneoestenosis.

- Participar en la interacción con pediatras y otros especialistas

- Actuar como ayudante (o neurocirujano principal bajo supervisión) y supervisar a su vez a los residentes junior en procedimientos neuroquirúrgicos básicos tales como:

- Punción de reservorio valvular.

- Derivación ventrículo peritoneal.

- Reparación de fracturas hundimiento.

- Evacuación de hematomas intracraneales.

- Craneoplastia y cirugía craneofacial básica.

- Craneotomía para la inserción de electrodos intracraneales.

- Inserción de estimuladores del vago.

- Craneotomía para tumores simples intracraneales.

- Laminectomías para patología no compleja.

- Craniectomía suboccipital para malformaciones de Chiari.

- Ventriculostomía endoscópica no complicada.

- Reparación de mielo y encefaloceles.

- Implantación de bomba de infusión (baclofeno)

- Actuar como ayudante o cirujano principal bajo supervisión directa en procedimientos neuroquirúrgicos más complejos tales como:

- Cirugía de tumores supratentoriales complejos y de tumores infratentoriales.

- Médula anclada.

- Cirugía craneofacial compleja.

- Resección de tumores espinales.

- Cirugía endoscópica compleja incluyendo la biopsia/resección de tumores

intraventriculares.

- Cirugía de malformaciones vasculares y procedimientos de revasculariación (Moya-Moya).

- Lobectomía temporal, hemisferectomía o callosotomía.

- Reparación de mielo y encefaloceles complejos.

- ***Conocimiento médico****:*
  - Expandir el conocimiento previo en neurociencias básicas y las lecturas relacionadas con la especialidad neuroquirúrgica (Anexo 1)
  - Abordar temas de investigación sobre los pacientes a su cargo en textos de referencia y en artículos.
- ***Comunicación y relaciones interpersonales****:*
  - Interactuar con las familias con sensibilidad acerca de situaciones de finalización de tratamiento (retirada terapéutica)
  - Comunicarse de forma efectiva con los residentes junior y senior y el staff de neurocirugía y de otros servicios.
  - Enseñar a los residentes junior y estudiantes de medicina a un nivel apropiado administrando retroalimentación
  - Servir como relación principal con el staff.
  - Asumir la responsabilidad para organizar algunas de las sesiones del servicio, tales como las monográficas, las destinadas a los residentes junior, o el “journal club” y otras conferencias clínicas
  - Realizar una o más presentaciones con poster en un foro internacional
  - Publicar algún trabajo científico en revistas con revisión por pares de ámbito nacional o internacional
- ***Profesionalismo****:*
  - Mejorar las subcompetencias incluidas de este dominio contempladas en los años 3º y 4º
- ***Aprendizaje basado en la práctica y mejora****:*
  - Completar la adquisición de las subcompetencias en este dominio contempladas en los años 3º y 4º
  - Supervisar la instrucción de los estudiantes de medicina y los residentes junior en las cuestiones básicas del cuidado de los enfermos.
- ***Practica-aprendizaje basada en sistemas***:
  - Completar la adquisición de subcompetencias de este dominio contempladas en los años 3º y 4º
  - Considerar el acceso a la salud de los pacientes a la hora de diseñar planes de cuidado médico
  - Considerar la relación coste-eficiencia en el cuidado de los pacientes de una forma que no comprometa la calidad del cuidado
- ***Colaboración interprofesional***
  - Mejorar la adquisición de las subcompetencias de este dominio contempladas en los años anteriores
- ***Desarrollo profesional y personal***
  - Mejorar la adquisición de las subcompetencias de este dominio contempladas en los años anteriores
  - Empezar a asumir liderazgo en el servicio
  - Participar con solidez en las sesiones didácticas del servicio

**Investigación.** El residente deberá completar durante los años 4º y 5º de Residencia su

**Formación en investigación** considerando las siguientes competencias (y desarrollando,

idealmente, un trabajo en investigación de tipo observacional o experimental que puede ser

completado y presentado o publicado en el 6º año de residencia):

- - Asimilar los fundamentos de la investigación traslacional.
  - Dominar la estadística utilizada en los trabajos y proyectos de investigación.
  - Cumplimentar algún curso (presencial o basado en la web) en investigación humana y animal.
  - Completar las habilidades para la lectura, interpretación y preparación de artículos científicos y manuscritos (incluidos meta-análisis)
  - Diseñar y presentar un proyecto de investigación en el foro apropiado de ámbito nacional (desde el propio servicio a otros).
  - Presentar uno o más posters relacionados con un trabajo o proyecto de investigación clínica o de laboratorio en un foro nacional o internacional
  - Remitir uno o más manuscritos de trabajo o proyecto de investigación desarrollado el laboratorio, o relacionado con series clínicas u otros contenidos a una revista con revisión por pares.

**SEXTO AÑO DE RESIDENCIA**

**Rotación por Neurocirugía de adultos (12 meses).** A lo largo de este año el residente prestará especial atención a uno de los campos de la práctica neuroquirúrgica que pueda ser objeto de una superespecialización

.- Al finalizar el año el residente cumplimentará los formularios de autoevaluación de la competencia y los de satisfacción y valoración de la actividad docente del staff y el funcionamiento del programa que recogerá en su Libro de Residente (o portafolio), junto con las evaluaciones que le hayan sido administradas por el tutor, el resto del staff y otros miembros del equipo.

**.**- Pasará el examen tipo test de conocimientos de final de residencia (ámbito local o nacional). De no superarlo deberá presentarse a otro examen similar que puede llevar un componente oral en el plazo máximo de 6 meses.

**Competencias a adquirir durante el 6º año:**

- ***Cuidado del paciente***:
  - Dirigir el manejo diario de los pacientes en el servicio
  - Supervisar las actuaciones clínicas de los residentes junior y los estudiantes de medicina y rotantes de otros servicios
  - Actuar como primer cirujano en procedimientos neuroquirúrgicos mayores realizando una parte de los mismos bajo supervisión directa.
  - Realizar los procedimientos básicos sin supervisión y dirigir y supervisar a los residentes junior en la realización de estos procedimientos
  - Refinar las habilidades operatorias adquiridas
  - Organizar el cuidado ambulatorio de los pacientes:

- Selección preoperatoria de pacientes.

- Organizar el calendario de cirugía.

- Aconsejar a los pacientes.

- Cuidados pre y postoperatorio

**Competencias quirúrgicas:**

A continuación se describe la relación de subcompetencias a alcanzar en el nivel avanzado (senior) en diferentes apartados de cirugía que hay que complementar con la relación de subcompetencias explicitadas en el mismo nivel del Anexo 1 donde se consideran las patologías mayores (tumoral, vascular, etc)

*Residente de nivel senior cirugía craneal*

- Dominar los principios básicos y realizar las partes fundamentales de cirugías, o la cirugía completa, en áreas de subespecialidad tales como cirugía vascular, epilepsia, columna y cirugía tumoral:
  - *Patología Vascular:*
    - Realizar la disección microquirúrgica del valle silviano para exponer las cisternas basales en la cirugía de aneurismas.
    - Exponer aneurismas intracraneales y realizar bajo supervisión directa el clipaje en algunos casos.
    - Craneotomía y exposición de hamartomas vasculares y malformaciones arteriovenosas, realizando la extirpación de estas en algunos casos bajo supervisión directa.
    - Manejo de la carótida extracraneal.
    - Participar en las técnicas endovasculares.
  - *Patología tumoral*:
    - Colocación del paciente, planificación y exposición de tumores infra y supratentoriales.
    - Realizar bajo supervisión indirecta o de forma independiente:

- Resección de tumores profundos.

- Resección de meningiomas de la base craneal.

- Resección transesfenoidal de tumores hipofisarios.

- Exposición y cierre de lesiones de la base craneal.

- - - Realizar cirugía del enfermo despierto.
    - Usar las técnicas de mapeo neurofisiológico y las ayudas de navegación en la cirugía.
  - *Funcional y dolor:*
    - Colocar una guía estereotáctica para neurocirugía funcional, calcular las coordenadas y seleccionar las trayectorias.
    - Comprender la información neurofisiológica relacionada con la colocación de electrodos.
- Realizar la colocación de electrodos de estimulación profunda.
  - - Realizar las técnicas percutáneas para la neuralgia del trigémino.
    - Planificar y realizar con ayuda la descompresión vascular para la neuralgia del trigémino.
    - Colocar catéteres y bombas intratecales para el dolor.
  - *Epilepsia:*
    - Entender los principios del tratamiento de la epilepsia, ser capaz de identificar a los candidatos para tratamiento quirúrgico y conocer los resultados de dicho tratamiento. Deberá ser capaz de:

- Realizar craneotomías para la cirugía de la epilepsia.

- Colocar electrodos subdurales y profundos o de estimulación vagal.

- Realizar una corticectomía para el tratamiento de la epilepsia.

- Realizar una callosotomía.

- - *Drenaje de LCR complejo:*
    - Deberá entender el uso y limitaciones de las técnicas endoscópicas en neurocirugía y ser capaz de realizar bajo supervisión:

- Una ventriculostomía endoscópica.

- Una resección/biopsia tumoral endoscópica.

*Residente de nivel senior en cirugía raquídea*

- Dominar el manejo de la patología de columna y nervio periférico.
- Realizar bajo supervisión indirecta o de forma independiente abordajes anteriores y posteriores a la columna:

- Laminectomías cervicales y lumbares.

- Procedimientos de fusión anterior y posterior de la columna cervical, torácica y lumbar.

- Reconstrucción espinal con todas las posibles fijaciones

- Resección de masas extra e intradurales.

- Procedimientos de liberación de nervios periféricos

- Ayudar en procedimientos más complejos de nervio periférico tales como los relacionados con el plexo braquial, neurolisis y reparación y resección de tumores de nervio periférico.
- ***Conocimiento médico****:*
- Actualizar constantemente los conocimientos básicos en neurociencias
  - Considerar los aspectos de investigación clínica planteados por los pacientes reales en textos de referencia y publicaciones periódicas de la especialidad y afines
  - Perfeccionar el hábito de lectura autodirigida de la literatura para la resolución de los problemas clínicos encontrados en la práctica.
  - Analizar los artículos de publicaciones de forma crítica para su uso práctico
- ***Comunicación y relaciones interpersonales****:*
  - Refinar la habilidad para aconsejar a pacientes y familiares acerca de los riesgos y beneficios de las diferentes opciones de tratamiento
  - Completar la capacidad para comunicarse de forma efectiva con los residentes y el staff de neurocirugía y los de otros servicios
  - Asumir el papel de primer contacto con los pacientes ingresados y las familias y servir como primer contacto con profesionales de otros servicios
  - Realizar una o más presentaciones de manera oral (o con poster) en un foro internacional
  - Publicar algún trabajo científico en revistas con evaluación por pares

- ***Profesionalismo:***
  - Completar la adquisición de competencias de este dominio contempladas en los años 3º a 5º
- ***Aprendizaje basado en la práctica y mejora***:
  - Completar la adquisición de las subcompetencias en este dominio contempladas en los años 3º a 5º
  - Identificar las fortalezas, deficiencias y límites de su propio conocimiento y “expertise”
  - Participar en la educación de los pacientes, las familias, y otros cuidadores sanitarios
- ***Practica-aprendizaje basada en sistemas****:*
  - Completar la adquisición de subcompetencias de este dominio contempladas en los años anteriores
- ***Colaboración interprofesional***
  - Completar la adquisición de las subcompetencias de este dominio contempladas en los años anteriores
- ***Desarrollo profesional y personal***
  - Completar la adquisición de las subcompetencias de este dominio contempladas en los años anteriores
  - Asumir definitivamente un papel de liderazgo en el servicio formando equipo con los miembros del staff y dirigir la preparación de presentaciones en el “journal club” y el resto de sesiones
  - Organizar y presentar las sesiones de morbi-mortalidad
  - Organizar visitas por profesores externos
  - Evaluar a los residentes y estudiantes
  - Desempeñar un papel de líder en el esfuerzo de los residentes por mejorar el programa de residencia.
  - Realizar y presentar una o más revisiones sistemáticas o meta-análisis en las sesiones de residentes y generales

***Competencias adicionales como Jefe de Residentes***

- Asumir una responsabilidad mayor en todos los aspectos del funcionamiento del servicio, incluidos los complejos y también el cuidado ambulatorio de pacientes.
- Recoger y manejar la información esencial acerca de los pacientes bien directamente, o a través del cuidado e información de los residentes junior.
- Monitorizar al nivel de un neurocirujano independiente los planes de cuidado médico y quirúrgico de los pacientes con traumatismo craneal, tumores intracraneales simples y complejos, aneurismas, malformaciones vasculares, patologías raquídeas y medulares y las posibles complicaciones tanto médicas y quirúrgicas.
- Aconsejar a los pacientes acerca de los riesgos, metas, limitaciones y alternativas de todos los procedimientos terapéuticos con énfasis en los procedimientos neuroquirúrgicos mayores
- Demostrar habilidad para realizar todos los procedimientos mayores en un nivel independiente, o bajo la supervisión indirecta en caso necesario de un miembro del staff
- Coordinar el manejo apropiado de los pacientes con otros servicios
- Guiar a los residentes junior en la evaluación y manejo de pacientes en la UCI, el quirófano y la consulta
- Enseñar a los residentes junior y estudiantes de medicina a un nivel óptimo administrando retroalimentación.
- Obtener la experiencia sobre las necesidades administrativas ligadas a la dirección de un servicio de Neurocirugía.

**OBJETIVOS QUIRÚRUGICOS**

A título orientativo el programa incluye en su **ANEXO 3** la matriz de un programa de neurocirugía de un servicio de EEUU que relaciona el nivel de competencia del residente para realizar diferentes intervenciones quirúrgicas con el año de residencia. En relación con los números totales de intervenciones nos referiremos a las del anterior Programa de Neurocirugía, en el que se prescribe que al final del período de formación el residente ha de haber participado en al menos 600 procedimientos neuroquirúrgicos, abarcando todos los ámbitos de la especialidad, y especificando la actuación bien como asistente, o bien como primer cirujano en intervenciones de cirugía vascular, patología del ángulo pontocerebeloso, línea media cerebral, patología de la base craneal, procedimientos estereotáxicos complejos, abordajes transesfenoidales y otros.

**MÍNIMOS**. Aunque se admite cierto grado de flexibilidad en función de la casuística del servicio, al terminar su período de formación, el residente debería haber realizado como primer cirujano:

- 30 intervenciones sobre tumores intracraneales, incluyendo los de línea media y fosa posterior.
- 70 intervenciones espinales, incluyendo hernias discales y procedimientos de estabilización.
- 35 intervenciones de neurotrauma.
- 25 intervenciones de derivación interna-externa de LCR.
- 40 intervenciones de otro tipo entre las que pueden incluirse: aneurismas, malformaciones vasculares, procedimientos funcionales, cirugías pediátricas, otras craneotomías (Chiari, craneoplastias, etc), síndromes dolorosos, trastornos funcionales, y otras
- 4 intervenciones sobre nervio periférico
- Participación directa en la planificación y realización de al menos seis tratamientos con Radiocirugía.

**Mínimos de actividades académicas**: El residente deberá haber presentado seis comunicaciones o posters en congresos y reuniones de ámbito nacional e internacional, y publicado al menos dos trabajos científicos en revistas de ámbito nacional o internacional con proceso de revisión por pares.

**8) EVALUACIÓN DEL RESIDENTE, DEL STAFF DOCENTE Y DEL PROGRAMA**

El **PLAN de EVALUACIÓN** del residente, el staff docente y el propio programa se explicita en todos sus extremos en el **Anexo 2**. La administración de las evaluaciones queda a criterio de los directores de programa en cada servicio, pues la adopción del sistema de evaluación ha de hacerse de una manera progresiva y acorde con la dedicación del staff. En cualquier caso, en el **Anexo 2** se especifica una **relación de mínimos de evaluación del residente.**

**La EVALUACIÓN DEL RESIDENTE puede incluir**:

1) Tests escritos para evaluar el conocimiento médico y la capacidad de contextualización clínica (juicio y razonamiento clínicos)

2) Pruebas de evaluación objetiva estructurada de la competencia clínica con enfermo real (tipo miniCEX, Discusión basada en Caso, PAME, otras) o con simulador (OSATS) en las que el supervisor clínico observa la actuación del residente en una entrevista clínica y después administra retroalimentación “constructiva”.

3) Pruebas de observación directa de procedimiento práctico con enfermo real o en ambiente o contexto simulado (ODPP);

4) Evaluaciones de las competencias mayores con Escalas globales a cumplimentar con una periodicidad a determinar en cada servicio

5) “Audits” realizados sobre los registros (informes) clínicos emitidos por el residente en número a determinar en cada servicio

6) Evaluación 360º, que incluye los EMEs con los que múltiples observadores del equipo puntúan al residente en diferentes contextos y sobre distintos ítems, y el miniPAT

7) Evaluación del nivel de competencia en las diferentes “milestones”

8) Autoevaluación del residente sobre sus propias actuaciones, que incluye formularios, escalas globales y el auto miniPAT.

Se prescribe como obligatorio el Libro del Residente (Log-book) dejando como opcional para los distintos servicios el uso del portafolio docente.

**EVALUACION DEL STAFF DOCENTE**. El residente debe evaluar a los miembro del staff implicados en su enseñanza y al tutor tanto en el servicio de neurocirugía, como en los servicios externos por los que rota durante la residencia. Además, el director del programa (usualmente el jefe de servicio) evaluará anualmente la dedicación docente de los componentes del staff.

**EVALUACION DEL FUNCIONAMIENTO DEL PROGRAMA**

El residente realizará evaluaciones individuales del funcionamiento del programa valorando la calidad de la enseñanza recibida, las sesiones y otros aspectos del programa que remitirá al tutor. Además, participará en evaluaciones de grupo (reuniones de residentes aislados y de residentes con el tutor) sobre la calidad docente y el funcionamiento del programa.

**LA SUPERVISIÓN DEL RESIDENTE Y LA ADMINISTRACIÓN DE RETROALIMENTACIÓN SOBRE SUS ACTUACIONES**

Este programa preconiza la supervisión del residente con disminución gradual de la proximidad de la misma a medida que recorre el trayecto formativo, y la observación durante sus actuaciones seguida de retroalimentación por parte del supervisor docente. Ya se señaló que la observación directa seguida de retroalimentación inmediata es el factor más determinante del aprendizaje en docencia médica. Obviamente, la retroalimentación más significativa en términos de cantidad es la que recibe el residente durante la práctica diaria en la que es observado de manera más o menos sistemática. Sin embargo, ésta no reemplaza a la prescrita en los programas basados en competencias que exigen la administración de pruebas de observación clínica objetiva estructurada (miniCEXx, evaluación 360º y otros) seguidas del pertinente feedback constructivo.

**9. FUNCIONES DEL TUTOR DE RESIDENTES**

El tutor es responsable de coordinar la instrucción y controlar la realización de las evaluaciones del residente de acuerdo con el programa y las normas de la Comisión de Docencia del hospital (ver apartado 4 de Instrucción del Residente). Sin embargo, el tutor no está específicamente encargado de pasar las pruebas de evaluación clínica objetiva estructurada, tarea ésta que comparte con los restantes miembros de la plantilla del servicio. El tutor es responsable de las siguientes funciones:

- Coordinar y asegurar la administración de los tests teóricos en interacción con el Comité de Programa cuyos resultados transferirá al residente y el jefe de servicio
- Monitorizar la adherencia del residente y del staff a todos los recursos de instrucción incluidos en el Programa
- Controlar la administración de las pruebas de evaluación clínica objetiva estructurada por los miembros de la plantilla (él mismo incluido) y recoger los resultados (Libro del Residente)
- Cumplimentar personalmente las escalas globales de evaluación de las competencias mayores (si se usaran éstas) y recoger los resultados (Libro del Residente)
- Asegurar la administración de los Audits de los informes clínicos y recoger los resultados Asegurar la administración de las evaluaciones 360º y recoger los resultados (Libro del Residente)
- Recoger las autoevaluaciones del residente (Libro del Residente)
- Organizar los encuentros del staff-tutor-residentes para discutir los resultados de las evaluaciones del residente, del staff y del programa
- Recoger y procesar las evaluaciones y encuestas de satisfacción del residente sobre el cumplimiento del compromiso docente del staff y el funcionamiento del programa (Libro del Residente)
- Organizar y coordinar con los tutores de otros servicios el plan de rotaciones y la administración de las evaluaciones
- Apoyar al residente de 6º año en la organización de las sesiones de morbi-mortalidad, “journal club” y otras sesiones clínicas
- Supervisar las iniciativas y el desarrollo de trabajos clínicos y de investigación y la preparación de publicaciones
- Coordinar la asistencia a cursos y congresos
- Elaborar informes sobre los resultados docentes que remitirá al Comité de Programa de la SENEC

**LA FORMACIÓN DEL TUTOR Y DE LOS RESTANTES MIEMBROS DEL STAFF PARA LA TAREA EVALUADORA**. **LA RETRIBUCIÓN DEL TUTOR.** Teniendo en cuenta la novedad que supone en su conjunto un programa basado en competencias, es ineludible la formación adecuada de los evaluadores, y más concretamente su entrenamiento en técnicas de evaluación objetiva estructurada; este entrenamiento también es conveniente para la preparación de las preguntas de los tests teóricos. La SENEC debería establecer un Curso de Formación con este propósito de carácter obligatorio para los tutores que a su vez podrían entrenar al resto del staff de sus servicios. La alternativa a cursos presenciales de formación del profesorado es claramente la utilización de la web de la sociedad.

**APÉNDICE 1**. Listado de los 8 dominios competenciales y las 54 competencias mayores relacionadas utilizados por el ACGME. (tomado de Englander R y cols; Acad Med 2013; 88:1088-1094)
