# Supplementary material
Source: Elsevier journal article supplement (https://www.sciencedirect.com/science/article/pii/S1130147316000233)
Supplement: mmc2 [file S1130147316000233:mmc2.docx]

**ANEXO nº 1 al PROGRAMA**

**COMPETENCIAS DE CONOCIMIENTO Y CUIDADO DEL PACIENTE A ADQUIRIR EN EL PROGRAMA DE NEUROCIRUGIA (2015)**

**Índice**

. Neuroanatomía (pág 1)

. Neurofisiología (pag 3)

. Neuropatología (pág 4)

. Neurofarmacología (pág 6)

. Neurología (pág 7)

. Neuroradiología (pág 8)

. Fluidos, electrolitos y Nutrición (pág 10)

. Cuidados intensivos (pág 11)

. Cirugía raquídea (pág 13)

. Cirugía vascular y endovascular (pág 15)

. Diagnóstico y tratamiento del dolor (pág 18)

. Patología infecciosa (pág 20)

. Neurocirugía funcional y estereotáxica (pág 20)

. Neurocirugía oncológica (pág 22)

. Neurocirugía pediátrica (pág 25)

. Neurotraumatología (pág 28)

. Cirugía sistema nervioso periférico (pág 30)

Este Anexo sigue, con algunas modificaciones, el mapa de objetivos de conocimiento y cuidado del paciente propuesto por el Comité conjunto de Docencia de las dos sociedades neuroquirúrgicas norteamericanas (AANS y CNS) referidos a tres niveles de desempeño del residente (básico, medio y elevado) tanto en las ciencias básicas como las clínicas. Como ya se apuntó en el texto del programa, los mapas parciales de competencias que contiene se complementan con los incluidos en este Anexo.

NEUROANATOMÍA

.- Competencia global: Demostrar conocimientos de anatomía necesarios para el diagnóstico de las enfermedades del sistema nervioso y para la práctica de la neurocirugía.

.- Competencias de conocimiento:

*a) Nivel Básico:*

General:

- Conocer el desarrollo embriológico del cerebro, cerebelo, tronco encéfalo, elementos gliales, médula y cono espinal, cola de caballo, sistema nervioso simpático y parasimpático y sistema nervioso periférico. Conocer también el desarrollo embriológico del cráneo, unión craneocervical y columna vertebral
- Conocer y diferenciar los diferentes tipos de neuronas y su anatomía microscópica. Nombrar los elementos de la glía y conocer su anatomía microscópica
- Conocer en detalle las arterias carótida, vertebral y sus ramas.
- Identificar y conocer el drenaje venoso del sistema nervioso central.
- Identificar los huesos del cráneo y suturas. Identificar cada foramen craneal y su contenido.
- Conocer la anatomía de las meninges incluyendo duramadre, aracnoides y piamadre.
- Conocer la anatomía de los ventrículos cerebrales y de las cisternas subaracnoideas.
- Conocer la anatomofisiología de la producción, flujo y reabsorción del líquido cefalorraquídeo.
- Identificar y describir la anatomía macroscópica de la columna.
- Enumerar los músculos relacionados con el cráneo y la columna vertebral.
- Conocer en detalle las bases anatómicas de la barrera hemato-encefálica.

Sistema Nervioso Central:

- Conocer la anatomía macroscópica del cerebro, cerebelo, tronco, nervios craneales y médula espinal.
- Conocer la anatomía microscópica de la corteza cerebral en detalle.
- Conocer en detalle la anatomía de las vías olfatoria, la formación hipocampal y amígdala.
- Conocer en detalle la anatomía del hipotálamo, hipófisis y diencéfalo.
- Conocer en detalle la anatomía del cerebelo.
- Conocer en detalle la anatomía del tronco encéfalo: mesencéfalo, protuberancia, bulbo.
- Conocer el curso de cada nervio craneal desde su origen a su terminación.
- Conocer en detalle la anatomía de la médula espinal.

Sistema Nervioso Autónomo:

- Distinguir neuronas pre y postganglionares y conocer la estructura del ganglio autonómico
- Conocer el sistema nervioso simpático y parasimpático.
- Conocer las fibras aferentes viscerales y las vías autonómicas centrales.

Sistema Nervioso Periférico:

- Diferenciar entre inervación segmentaria y periférica.
- Conocer la anatomía de los plexos cervical, braquial y lumbosacro.
- Conocer la anatomía de los nervios periféricos de las extremidades superiores e inferiores.
- Conocer en detalle la anatomía microscópica de los nervios periféricos.
- Conocer la diferencia entre fibras mielínicas y amielínicas.

Músculo:

- Explicar el concepto de unidad motora.
- Conocer la anatomía de la placa motora.
- Conocer la anatomía microscópica del músculo liso y del estriado.

*b) Nivel Medio*:

- Conocer los síndromes producidos por masas que afectan a los nervios craneales incluyendo las lesiones supraselares, del foramen yugular, del conducto auditivo interno y de la incisura.
- Conocer las manifestaciones clínicas de las lesiones de los nervios periféricos mayores.
- Conocer la anatomía y la presentación de los diferentes síndromes de atrapamiento y los abordajes quirúrgicos para el tratamiento de los mismos.
- Conocer la presentación clínica de lesiones de médula espinal y raíces nerviosas.

.- Competencias de Cuidado del paciente

*a) Nivel Medio:*

- Identificar durante la cirugía:
  - Arteria occipital, temporal superficial y meníngea media.
  - Suturas sagital, coronal; pterion, inion y asterion.
  - Senos sagital, transverso y sigmoide.
  - Foramen oval, redondo y espinoso.
  - Fisura orbitaria superior.
  - Todos los nervios craneales.
  - Arterias cerebrales y venas.
  - Componentes del tronco-encéfalo incluyendo el suelo del IV ventrículo.
  - Componentes del cerebelo: vermis, amígdalas, etc.
  - Surcos y giros mayores supratentoriales: silvio, central, etc.
  - Lóbulos cerebrales.
- Identificar durante la cirugía estructuras visibles en los ventrículos laterales incluyendo: foramen de Monro, fornix, caudado, tálamo, fisura coroidea, venas, plexos coroideos e hipocampo.
- Identificar durante la cirugía las partes de la columna vertebral, médula espinal y raíces incluyendo: espinosas, láminas, facetas superiores e inferiores, pedículos, foramen y raíz, ganglio raquídeo, espacio discal, arteria vertebral, columna dorsal y lateral de la médula y raíces aferentes y eferentes intradurales.

NEUROFISIOLOGÍA

**.- Competencia global**: Demostrar los conocimientos de fisiología necesarios para entender las enfermedades neurológicas. (ver Competencias de Neurología en página 7)

**.- Competencias de conocimiento**:

# *a) Nivel Básico y Medio:*

- Conocer la fisiología básica de los nervios y de la transmisión sináptica. (funcionamiento de la membrana, potenciales de acción, canales iónicos, tipos de neurotransmisores y receptores)
- Conocer la fisiología del sistema motor, sensitivo y del sistema nervioso autónomo simpático y parasimpático (receptores sensitivos, codificación de la información sensitiva y sensorial, mecanismos del dolor y la analgesia, procesamiento de la visión, la audición y olfacción, mecanismos de la contracción muscular, reflejos espinales y de tronco, control vestibular de la postura y el movimiento, control del movimiento por el cortex cerebral, el cerebelo y los ganglios basales, mecanismos funcionales de los sistema autonómicos)
- Conocer las bases fisiológicas del despertar y la emoción.
- Conocer las funciones superiores incluyendo la anatomía del lenguaje y la función de la corteza de asociación.
- Conocer las bases fisiológicas de la producción y reabsorción de líquido cefalorraquídeo.
- Conocer el control fisiológico de la vascularización y el flujo cerebral
- Conocer en detalle la fisiología del hipotálamo e hipófisis y su control de la función endocrina.

NEUROPATOLOGÍA.

**.- Competencia global**: Demostrar conocimiento de neuropatología necesaria para el diagnóstico de las enfermedades del sistema nervioso y de la práctica de la neurocirugía.

# .- Competencias de conocimiento:

## *a) Nivel Medio*:

- Neuropatología General:
  - Conocer las técnicas disponibles para el examen de muestras quirúrgicas del sistema nervioso central, sistema nervioso periférico, músculo esquelético, glándulas pineal e hipofisaria.
  - Conocer las tinciones comunes e inmunohistoquímicas empleadas.
  - Conocer las técnicas disponibles para el examen morfológico del líquido cefalorraquídeo y las anomalías observadas en pacientes con carcinomatosis meníngea, linfomatosis, meningitis bacteriana y meningitis aséptica.

Sistema Nervioso Central:

- Conocer los rasgos histopatológicos macroscópicos y las bases genéticas de las malformaciones congénitas y perinatales.
- Conocer los rasgos histopatológicos macroscópicos y las características de los agentes causantes de las enfermedades infecciosas más frecuentes.
- Conocer los rasgos histopatológicos macroscópicos de las lesiones vasculares más habituales: infartos agudos, subagudos y antiguos, vasculitis, aneurismas cerebrales de diferentes tipos, malformaciones arteriovenosas, cavernomas, etc.
- Conocer los rasgos histopatológicos mayores de las lesiones traumáticas.
- Conocer los rasgos histopatológicos mayores de las enfermedades desmielinizantes como la esclerosis múltiple o la leucoencefalopatía multifocal progresiva.
- Conocer los rasgos histopatológicos mayores y las bases genéticas de las demencias y enfermedades degenerativas, fundamentalmente de la enfermedad de Alzheimer.
- Conocer los rasgos histopatológicos de las siguientes neoplasias del SNC:
  - Astrocitomas fibrilares difusos, astrocitomas gemistocíticos.
  - Astrocitomas anaplásicos.
  - Glioblastoma multiforme incluyendo el de células gigantes y el gliosarcoma.
  - Gliomatosis cerebro.
  - Astrocitoma pilocítico.
  - Astrocitoma subependimario de células gigantes.
  - Xantoastrocitoma pleomorfo.
  - Oligodendrogliomas.
  - Ependimomas y subependimomas.
  - Tumores de plexos coroideos.
  - Quistes coloides.
  - Gangliocitomas y gangliogliomas.
  - Tumor neuroepitelial disembrioplásico.
  - Neurocitoma central.
  - Meduloblastomas.
  - Tumor rabdoide/teratoide atípico.
  - Tumores neuroectodérmicos primitivos y neuroblastoma cerebral.
  - Paraganglioma espinal.
  - Meningiomas y subtipos, meningiomas atípicos y malignos
  - Hemangiopericitoma meníngeo
  - Melanomatosis y melanoma meníngeo.
  - Hemangioblastomas.
  - Lipomas.
  - Linfomas primarios del SNC.
  - Teratomas.
  - Dermoides y epidermoides.
  - Schwanomas incluyendo neurinoma del acústico.
- Conocer los rasgos histopatológicos mayores y las bases genéticas de los siguientes síndromes tumorales:
- Neurofibromatosis tipo 1 y tipo 2.
- Síndrome de Von Hippel-Lindau.
- Esclerosis tuberosa.
- Síndrome de Cowden.
- Síndrome de Turcot.

Sistema Nervioso Periférico:

- - - Conocer los rasgos histopatológicos mayores y las bases genéticas y bioquímicas de los trastornos de los nervios periféricos más frecuentes (neuropatía diabética, síndrome de Guillain-Barre).
    - Conocer los rasgos histopatológicos mayores de las siguientes neoplasias y tumores de los nervios periféricos: Schwanoma periférico, neurofibromas, tumor maligno de las vainas nerviosas, quistes de las raíces espinales y de los nervios periféricos.

Hipófisis y Pineal:

- - - Conocer los rasgos histopatológicos mayores de las siguientes lesiones de la hipófisis: Adenomas pituitarios incluyendo los no secretores y los secretores. Craniofaringiomas. Quistes de la bolsa de Rathke. Hipofisitis linfocitaria. Infartos hipofisarios incluyendo la “apoplejía” hipofisaria.
- Conocer los rasgos histopatológicos mayores de las siguientes lesiones pineales: Germinomas. Teratomas y carcinomas embrionarios. Pinealoblastomas y pineocitomas.

Cráneo y columna:

- Conocer los rasgos histopatológicos mayores de las siguientes lesiones craneales: Dermoides y epidermoides. Hemangiomas. Osteomas. Cordomas. Granuloma eosinófilo solitario y multifocal. Enfermedad de Paget incluyendo osteosarcoma secundario. Plasmocitoma incluyendo mieloma.
- Conocer os rasgos histopatológicos mayores de las siguientes alteraciones de la columna y los discos intervertebrales: Disco intervertebral herniado. Enfermedad por pirofosfato incluyendo la afectación del ligamento amarillo. Hemangiomas. Cordomas. Granuloma eosinófilo. Plasmocitoma incluyendo mieloma. Linfomas. Tumores óseos primarios. Osteomielitis espinal incluyendo tuberculosis e infecciones fúngicas.

NEUROFARMACOLOGÍA.

**.- Competencia global**: Demostrar los conocimientos de farmacología necesarios para el tratamiento de enfermedades neurológicas y de enfermedades que afectan al sistema nervioso.

**.- Competencias de conocimiento:**

*Nivel básico:*

1. Conocer las bases de la neurotransmisión básica celular incluyendo:
2. La sinapsis.
3. Potenciales de membrana.
4. Bombas iónicas de membrana.
5. Canales iónicos de membrana.
6. Secreción e identificación de transmisores.
7. Conocer la farmacodinamia y farmacocinética de los receptores, incluyendo:
8. Clasificación de receptores
9. Identificación de receptores
10. Curvas dosis-respuesta
11. Agonistas y antagonistas
12. Modulación de receptores
13. Conocer el neurotransmisor acetilcolina en detalle, incluyendo:
14. Clasificación de los receptores colinérgicos
15. Aspectos funcionales de los receptores colinérgicos
16. Síntesis, almacenamiento y liberación de acetilcolina
17. Conocer los neurotransmisores catecolaminérgicos (norepinefrina y dopamina) en detalle, incluyendo:
18. Biosíntesis de catecolaminas
19. Almacenamiento y liberación de catecolaminas
20. Anatomía de los receptores de catecolaminas
21. Receptores adrenérgicos
22. Receptores dopaminérgicos
23. Conocer el neurotransmisor serotonina en detalle, incluyendo:
24. Anatomía de los receptores de serotonina
25. Biosíntesis, almacenamiento y liberación de serotonina
26. Subtipos de receptores de serotonina
27. Conocer el neurotransmisor glutamato en detalle, incluyendo:
28. Biosíntesis, almacenamiento y liberación de glutamato
29. Receptores ionotrópicos de glutamato:
30. Receptores NMDA y subunidades
31. Receptores no-NMDA y subunidades
32. Receptores metabotrópicos de glutamato:
33. Receptores metabotrópicos grupo I y subunidades
34. Receptores metabotrópicos grupo II y subunidades
35. Receptores metabotrópicos grupo III y subunidades
36. Papel en las enfermedades neurológicas
37. Conocer los neurotransmisores GABA y glicina en detalle.
38. Síntesis, almacenamiento y liberación
39. Fisiología y farmacología
40. Agonistas y antagonistas clínicamente relevantes de los receptores de GABA y glicina
41. Conocer los péptidos neurotransmisores.
42. Conocer la farmacología de cada uno de los fármacos utilizados en el tratamiento de las enfermedades neurológicas.

NEUROLOGÍA.

**.- Competencia global**: Demostrar un entendimiento del examen neurológico, de los test diagnósticos, y de las enfermedades neurológicas y su tratamiento.

# .- Competencias de conocimiento:

1. *Nivel Básico y Medio:*

- Conocer los principios, indicaciones e interpretación de las siguientes pruebas de diagnóstico neurofisiológico:
  - Electroencefalografía (EEG). Patrones normales y patológicos
  - Potenciales evocados sensitivos (PES), visuales (PEV) y motores (PEM).
  - Electromiografía (EMG). Alteraciones en enfermedades neuromusculares.
  - Velocidad de conducción nerviosa (VCN). Velocidades de transmisión en los nervios principales. Cambios de VCN en las neuropatías.
    - Conocer el perfil clínicopatológico del delirium y la demencia y el diagnóstico diferencial de cada uno.
    - Definir y conocer el coma y los estados de alteración de la conciencia.
    - Realizar el diagnóstico diferencial en el paciente con síncope.
    - Conocer la presentación clínica y discutir la evaluación radiológica, clínica y el manejo de:
      - Accidente isquémico transitorio
      - Infarto cerebral
      - Hemorragia cerebral y cerebelosa
      - Hemorragia subaracnoidea
      - Infarto venoso.
        - Conocer la etiología, presentación clínica, diagnóstico y manejo de las vasculitis cerebrales.
        - Conocer el diagnóstico y manejo del pseudotumor cerebri.
        - Conocer el diagnóstico y tratamiento de la hidrocefalia a presión normal.
        - Conocer el manejo del coma diabético hiperosmolar, hiperglucémico no cetósico
        - Tener una idea general de las alteraciones cromosómicas que pueden afectar al SNC incluyendo la etiología, patrones de herencia, penetrancia y tests diagnósticos.
        - Conocer en detalle los mayores síndrome neurocutáneos: Neurofibromatosis tipo 1 y 2, angiomatosis encefalotrigeminal, y esclerosis tuberosa.
        - Conocer la neuropatía periférica, polineuropatía, mononeuropatía, mononeuropatía múltiple y neuritis y las principales neuropatías hereditarias.
        - Conocer la etiología, presentación clínica, diagnóstico, tratamiento y pronóstico del síndrome de Guillain-Barre, y otras neuropatías adquiridas diferentes tales como: la polineuritis crónica desmielinizante, polineuropatía asociada a deficiencias dietéticas, neuropatías asociadas a radiación, frío, etc.)
        - Conocer la fisiopatología, presentación clínica, tratamiento y pronóstico de la enfermedad de Alzheimer, enfermedad de Pick y enfermedad por cuerpos de Lewy.
        - Definir el hemicorea y hemibalismo, las distonías focales y globales, el mioclono y el temblor esencial benigno.
        - Conocer en detalle la fisiopatología, presentación clínica, diagnóstico, tratamiento y pronóstico del Parkinsonismo.
        - Conocer la fisiopatología, presentación clínica, diagnóstico, tratamiento y pronóstico de: Esclerosis lateral amiotrófica, Miastenia Gravis juvenil y del adulto.
        - Conocer las distrofias musculares comunes: Distrofia muscular de Duchenne y otras.
        - Conocer la epidemiología, fisiopatología, presentación clínica, diagnóstico, tratamiento y pronóstico de la Esclerosis Múltiple.
        - Conocer en detalle la mielinolisis central pontina.
        - Conocer la fisiopatología, presentación clínica, diagnóstico, tratamiento y pronóstico de las cefaleas migrañosas y de los síndromes de cefaleas no migrañosas
        - Conocer la fisiopatología, presentación clínica, diagnóstico, tratamiento y pronóstico de las diferentes formas de epilepsia en detalle. Definir el estatus epiléptico y discutir su tratamiento médico.
        - Describir las implicaciones neurológicas del alcoholismo.

NEURORRADIOLOGÍA- INTERVENCIONISMO ENDOVASCULAR.

**.- Competencia global**: Demostrar un entendimiento de las pruebas de imagen neurorradiológicas y de las intervenciones relacionadas específicamente con pacientes neuroquirúrgicos.

# .- Competencias de conocimiento:

## a*) Nivel Básico:*

- Conocer las precauciones que deben tomarse a la hora de realizar un examen radiológico.
- Identificar las estructuras anatómicas normales de las proyecciones radiográficas del cráneo antero-posterior, lateral y reconocer las lesiones más comunes que pueden detectarse en la radiografía simple de cráneo, traumáticas y no traumáticas (fracturas, neoplasias, infecciones)
- Conocer las indicaciones de arteriografía carotídea, cerebral y espinal.
- Identificar las principales arterias y venas del cuello y cerebro en angiografía.
- Conocer las bases de la tomografía computerizada (TC) y la Resonancia Magnética (RM) y las principales secuencias de imagen utilizadas, incluyendo las secuencias de navegación.
- Identificar las estructuras anatómicas normales del cuero cabelludo, cráneo, dura, cerebro y vasos cerebrales en la TC y RM y reconocer las lesiones más comunes que se pueden detectar en la TC y RM de cráneo:
- Traumáticas (Fracturas craneales, hematomas intracraneales (epidural, subdural, intraparenquimatoso, intraventricular), contusiones cerebrales, hemorragia subaracnoidea, lesión axonal difusa
- No traumáticas (Infarto isquémico, infarto venoso, hidrocefalia, quistes, tumores, edema cerebral, infecciones, anomalías congénitas).
- Identificar las estructuras anatómicas normales de la unión craniovertebral y de la columna cervical, dorsal y lumbar en las radiografías simples y en la TC.
- Conocer el diagnóstico radiológico de la platibasia y cranial settling y describir las anomalías congénitas de la unión craniovertebral.
- Identificar los hallazgos en radiografías simples y en la TC de los traumatismos de la unión craniovertebral más comunes y de las lesiones traumáticas espinales.
- Conocer las indicaciones de TC y RM espinales en el contexto de traumas espinales. Describir la apariencia en RM de las lesiones traumáticas.
- Reconocer las enfermedades degenerativas espinales detectables con RM (degeneración y hernia discal, estenosis de canal, hipertrofia facetaria, osteofitos, espondilolistesis, escoliosis).
- Identificar la médula espinal y los tumores medulares en la TC y RM.

*Nivel Medio:*

1. Conocer las variantes congénitas más comunes de la circulación carotídea y vertebral en la angiografía cerebral.
2. Identificar y caracterizar las malformaciones vasculares en las angiografías.
3. Reconocer los Aneurismas, Malformaciones arteriovenosas, Angiomas venosos, Fístulas arteriovenosas
4. Conocer el papel de la angiografía por RM (AngioRM), de la venografía y de la TC de perfusión en la evaluación de la enfermedad cerebrovascular, tumores, y el trauma.
5. Conocer la evaluación radiológica de las vasculitis del SNC.
6. Conocer la evaluación radiológica de las malformaciones vasculares espinales.
7. Conocer el papel de los estudios con radioisotopos en la evaluación de pacientes con sospecha de enfermedad craneal o espinal.
8. Conocer las bases e indicaciones de la ultrasonografía.
9. Conocer los hallazgos normales y patológicos en la ecografía transfontanelar neonatal.
10. Conocer los hallazgos normales y patológicos en la ecografía-doppler carotídea.
11. Dominar el uso de la ecografía-doppler transcraneal en el manejo de pacientes con hemorragia subaracnoidea, trauma craneal, y enfermedad isquémica cerebral.

*Nivel Avanzado:*

1. Conocer las indicaciones de la terapia endovascular intervencionista para:
2. Aneurismas saculares y fusiformes
3. Vasoespasmo
4. Malformaciones vasculares craneales
5. Malformaciones vasculares espinales
6. Embolización de tumores
7. Estenosis carotídea y vertebral
8. Disección carotídea y vertebral
9. Describir las indicaciones y la técnica de la oclusión endovascular.
10. Estudiar el papel de los estudios cuantitativos de flujo cerebral en el manejo del paciente neuroquirúrgico.
11. Describir los conceptos de la tomografía por emisión de positrones (PET). Revisar las indicaciones de dicha prueba.
12. Conocer las bases de la resonancia magnética funcional y las indicaciones de dicha prueba.
13. Describir las bases de la espectroscopia por resonancia magnética y las indicaciones de dicha prueba en el paciente neuroquirúrgico.
14. Conocer las indicaciones y la técnica de la discografía .
15. Conocer las indicaciones de la vertebroplastia percutánea y la práctica del procedimiento.

.**- Competencias de Cuidado del paciente**

*a) Nivel Básico:*

- Solicitar los estudios radiológicos apropiados y en su momento adecuado.
- Interpretar los estudios radiológicos de los traumatizados.

*b) Nivel Medio*:

- Interpretar las arteriografías carotídeas, vertebrales y espinales.
- Interpretar las TC y RM craneales y espinales.

*c) Nivel Avanzado:*

- Interpretar todas las exploraciones radiológicas indicadas en los pacientes neuroquirúrgicos.
- Demostrar capacidad para usar los ultrasonidos intraoperatorios.

**FLUIDOS, ELECTROLITOS Y NUTRICIÓN**

**.- Competencia global:** Demostrar conocimiento de la homeostasis de fluidos y electrolitos, en condiciones normales y patológicas y la habilidad para mantener un equilibrio electrolítico normal. Demostrar un entendimiento de las bases en cuanto a nutrición del paciente neuroquirúrgico.

**.- Competencias de conocimiento:**

*Nivel básico y medio:*

1. Conocer la distribución normal intracelular y extracelular de fluidos y electrolitos, incluyendo:
2. Distribución y metabolismo de sodio y agua
3. Evaluación clínica del balance de sodio y agua y de la osmolaridad
4. Requerimientos de mantenimiento normales
5. Manejo de las condiciones patológicas como la diabetes insípida y el síndrome de secreción inadecuada de ADH
6. Síndrome pierde-sal cerebral
7. Conocer las potenciales implicaciones de la diuresis y la restricción hídrica en el equilibrio hidroelectrolítico.
8. Identificar las potenciales implicaciones de las deficiencias y excesos de calcio, fósforo y magnesio en el equilibrio hidroelectrolítico.
9. Conocer los criterios de la evaluación nutricional, incluyendo:
10. Historia de pérdida de peso significativa
11. Hipoalbuminemia
12. Respuesta inmune disminuida incluyendo linfopenia y anergia
13. Signos físicos de malnutrición
14. Conocer la respuesta metabólica al ayuno y al estrés.
15. Conocer y contrastar las indicaciones, contraindicaciones, complicaciones y beneficios de la nutrición enteral y parenteral.
16. Conocer las implicaciones de deficiencias nutricionales específicas y su relación con patologías neurológicas y neuroquirúrgicas.
17. Conocer brevemente los trastornos de la deglución.
18. Conocer los cambios metabólicos y requerimientos nutricionales en el paciente con trauma craneal, y su evaluación.

**Competencias para el Cuidado del paciente:**

*Nivel Junior y Medio:*

1. Manejar los requerimientos hidroelectrolíticos de los pacientes neuroquirúrgicos neonatos, pediátricos y adultos.
2. Colocar catéteres venosos centrales y tubos de nutrición enteral.
3. Prescribir adecuadamente una nutrición parenteral y enteral.
4. Reconocer y tratar las complicaciones asociadas a la nutrición parenteral y enteral, incluyendo:
5. Sepsis
6. Intolerancia a la glucosa
7. Diarrea
8. Deshidratación
9. Reconocer y tratar trastornos de la deglución.

**CUIDADOS INTENSIVOS**

**.- Competencia global:** Demostrar habilidad para identificar pacientes neuroquirúrgicos que precisan cuidados intensivos y para manejarlos

**.- Competencias de conocimiento:**

*Nivel básico:*

1. Conocer las características del paciente, adulto y pediátrico, susceptible de ser manejado en una Unidad de Cuidados Intensivos, incluyendo los aspectos tanto médicos como neuroquirúrgicos.
2. Conocer los cuidados médicos básicos para el manejo de los pacientes neuroquirúrgicos en una UCI: Profilaxis de hemorragia gastrointestinal; profilaxis de complicaciones pulmonares; profilaxis, diagnóstico y tratamiento de trombosis venosa y embolismo pulmonar, diagnóstico y tratamiento de la sepsis
3. Conocer las indicaciones y farmacocinética de los fármacos usados comúnmente en el manejo de los pacientes neuroquirúrgicos en cuidados intensivos, incluyendo: Drogas vasoactivas, Fármacos inotrópicos, Broncodilatadores, Diuréticos, Antiarrítmicos, Antihipertensivos, Antimicrobianos, Anticonvulsivantes
4. Conocer la presentación clínica, evaluación y tratamiento de las infecciones más frecuentes del paciente neuroquirúrgico en cuidados intensivos.
5. Conocer las indicaciones de intubación orotraqueal, incluyendo:
6. Conocer los valores-parámetros pulmonares más usados:
   1. Parámetros de función pulmonar: Frecuencia, volumen tidal, capacidad vital forzada (CVF), capacidad pulmonar residual (CPR), volumen ventilatorio máximo (VVM)
   2. Modos y ajustes de respiradores.
7. Conocer las indicaciones para extubar a los pacientes de la ventilación asistida.
8. Conocer los fármacos utilizados para mejorar la función pulmonar.
9. Conocer los trastornos del equilibrio ácido-base en el SNC y la presión intracraneal.
10. Conocer los parámetros de función cardiaca: precarga, postcarga y contractilidad.
11. Conocer las indicaciones de añadir monitorizaciones y la utilidad de las mismas, incluyendo: Catéteres arteriales, vías venosas centrales, catéter de Swan-Ganz, capnógrafo.
12. Conocer el diagnóstico y los principios de manejo de los siguientes trastornos endocrinos: Hipo/hipertiroidismo, hipo/hiperadrenocortisolismo, diabetes mellitus, diabetes insípida
13. Conocer las definiciones, médica y legal, de la muerte cerebral.
14. Conocer los aspectos éticos y morales relativos al cuidado de pacientes críticos neuroquirúrgicos, incluyendo: a)Peticiones del paciente o la familia para continuar o para suspender el tratamiento, y b) Donación de órganos

**.- Competencias del Cuidado del paciente:**

*Nivel básico y medio:*

1. Demostrar la habilidad para llevar a cabo la evaluación inicial del paciente neuroquirúrgico que precisa cuidados intensivos.
2. Realizar los siguientes procedimientos:
3. Intubación orotraqueal
4. Intubación nasogástrica
5. Sondaje vesical
6. Participar en la actividad del equipo de atención al traumatizado.
7. Demostrar habilidad para manejar pacientes neuroquirúrgicos en el contexto de cuidados intensivos.
8. Diagnosticar y tratar alteraciones del equilibrio ácido-base en el paciente neuroquirúrgico.

*Nivel Avanzado:*

1. Supervisar y dirigir a un residente de menor rango en el manejo de pacientes críticos neuroquirúrgicos.

# CIRUGÍA RAQUIDEA.

**.- Competencia global**: Demostrar conocimiento de la anatomía, fisiología, fisiopatología y presentación de las enfermedades de la columna, sus ligamentos, la médula espinal, la cola de caballo y las raíces nerviosas y capacidad para formular y llevar a cabo un plan diagnóstico y terapéutico para las enfermedades que afectan a estas estructuras y que son susceptibles de tratamiento quirúrgico.

## .- Competencias de conocimiento:

*a) Nivel Básico:*

- Conocer a la anatomía de la unión craniocervical, columna cervical, torácica, lumbar, sacro y pelvis. Interpretar las pruebas de imagen.
- Identificar los síndromes causados por los trastornos degenerativos: radiculopatías, mielopatías, inestabilidad y claudicación neurógena.
- Identificar los síndromes comunes de las lesiones medulares y radiculares, incluyendo la lesión medular completa, lesión cordonal anterior, Brown Sequard, centromedular, siringomielia, cono medular y la cola de caballo
- Conocer las indicaciones de discectomía cervical, torácica y lumbar.
- Manejo inicialmente los pacientes con lesión vertebral y medular.
- Clasificar las fracturas, luxaciones y lesiones ligamentarias de la columna en sus tres segmentos
- Clasificar las lesiones en estables o inestables y conocer las indicaciones de tratamiento quirúrgico.

*b) Nivel Medio*:

- Reconocer los signos radiológicos de inestabilidad.
- Conocer las indicaciones, usos y eficacia de las ortesis espinales más comunes.
- Comparar y contrastar las indicaciones para abordajes anteriores o posteriores a la columna cervical para hernias discales cervicales, espondilosis e inestabilidad.
- Conocer el papel de la corporectomía en el manejo de los trastornos de la columna cervical.
- Comparar y contrastar las indicaciones de discectomía cervical anterior con o sin fusión.
- Conocer las indicaciones y técnica de las fijaciones cervicales anteriores y posteriores.
- Conocer el diagnóstico y manejo de los tumores vertebrales primarios, tumores medulares y enfermedad metastásica espinal incluyendo las indicaciones de descompresión posterior, anterior y radioterapia.
- Conocer la clínica y las opciones de manejo de la médula anclada y siringomielia.
- Conocer los principios de manejo de las infecciones espinales.
- Conocer los principios de manejo de fístulas de LCR intraoperatorias y postoperatorias.
- Dominar el manejo quirúrgico de lesiones intradurales congénitas, neoplásicas y vasculares.

c) *Nivel Avanzado:*

- Conocer las indicaciones de arteriografía en el manejo de patologías espinales.
- Conocer el manejo de la espondilosis cervical secundaria a artritis reumatoide.
- Comparar y contrastar las opciones de tratamiento de la mielopatía cervical espondilótica.
- Comparar y contrastar los abordajes transtorácicos, transpediculares, costotransversos y lateral extracavitario.
- Conocer las indicaciones de fusión torácica y lumbar para enfermedades congénitas, iatrogénicas y degenerativas, diferenciando las técnicas abiertas y la mínimamente invasivas
- Comparar y contrastar las indicaciones de fusión intersomática lumbar anterior y posterior.
- Conocer la clasificación de los tumores espinales.
- Conocer las opciones de tratamiento de las fracturas de atlas y axis y de columna cervical baja.
- Conocer, comparar y contrastar las indicaciones de procedimientos anteriores, posteriores o posterolaterales en el manejo de tumores, traumatismos o infecciones toracolumbares.

**.- Competencias de Cuidado del Paciente**

*a) Nivel Básico*:

- Realizar una historia y exploración completas en pacientes con patología espinal e interpretar las pruebas de imagen.
- Realizar punciones lumbares y colocar drenajes lumbares.
- Colocar y manejar una tracción transcraneal y un halo-jacket.
- Obtener injertos de hueso antólogo.
- Conocer el manejo postoperatorio de los pacientes intervenidos de columna.
- Realizar con ayuda una laminectomía descompresiva lumbar.
- Extirpar con ayuda una hernia discal lumbar.

*b) Nivel Medio:*

- Realizar exposición anterior y discectomía cervical.
- Realizar los siguientes procedimientos:
  - Artrodesis intersomática cervical anterior.
  - Laminectomía cervical descompresiva.
  - Foraminotomía posterior con o sin discectomía.
  - Artrodesis de espinosas en columna cervical baja.
  - Realizar abordajes mediales y laterales a hernias discales lumbares.
  - Reintervenciones por recurrencias de hernias o reestenosis lumbares.
  - Realizar artrodesis lumbar posterior con o sin instrumentación intersomática.
- Realizar laminectomías con o sin instrumentación transpedicular para tumores, infecciones o trauma.
- Manejar las complicaciones postquirúrgicas de cirugía espinal.

*c) Nivel Avanzado:*

- Actuar de manera independiente en todas las fases del manejo de pacientes con patología espinal.
- Realizar una artrodesis occipito-cervical, colocar alambres sublaminares , tornillos a masas laterales, tornillos transpediculares torácicos, tornillos a C2 y tornillos transarticulares C1-C2.
- Realizar, con ayuda si es necesario, una odontoidectomía transoral.
- Realizar una corporectomía cervical seguida de artrodesis.
- Realizar, con ayuda si es necesario, abordajes a la columna dorsal y lumbar transtorácicos, toracoabdominales, retroperitoneales y transabdominales.
- Realizar abordaje costotransverso y lateral extracavitario a la columna toracolumbar y resecar hernias torácicas.
- Colocar tornillos transpediculares a nivel torácico y lumbar por técnica abierta y mínimamente invasiva
- Colocar ganchos laminares, transversos o pediculares.
- Resecar neoplasias espinales intradurales.
- Realizar vertebroplastias y cifoplastias con metilmetacrilato.
- Extirpar quistes aracnoideos y sirinx espinales.
- Realizar procedimientos intradurales para lesiones congénitas, neoplásicas y vasculares.

CIRUGÍA VASCULAR CEREBRAL Y ENDOVASCULAR CEREBRAL Y ESPINAL.

**.- Competencia global**: Demostrar conocimiento de la anatomía, fisiología, fisiopatología y forma de presentación de las enfermedades cerebrovasculares, incluyendo ictus isquémicos y hemorrágicos así como otras enfermedades y malformaciones del árbol vascular intracraneal, extracraneal y espinal, y capacidad para formular y poner en práctica un plan de diagnóstico y tratamiento para estas patologías incluyendo su tratamiento médico y quirúrgico.

**.- Competencias de conocimiento**:

*a) Nivel Básico:*

- Conocer la anatomía de los vasos extra e intracraneales, la localización de las arterias perforantes principales, sus territorios de irrigación y las consecuencias de su oclusión y la circulación venosa del SNC.
- Identificar los síndromes clásicos de oclusión de los principales vasos cerebrales.
- Conocer los conceptos de flujo sanguíneo cerebral, autorregulación cerebral, umbrales isquémicos, presión intracraneal, presión de perfusión cerebral.
- Reconocer las causas más frecuentes de isquemia cerebral.
- Asociar la evidencia en imagen de daño isquémico con su posible sustrato anatómico.
- Conocer la epidemiología, fisiología y fisiopatología del daño cerebral isquémico.
- Reconocer las causas más frecuentes de hemorragia intracraneal e intraespinal.
- Relacionar las características típicas de imagen de hemorragia del SNC con las posibles causas.
- Reconocer el curso clínico normal de los pacientes con ictus isquémicos o hemorrágicos.
- Conocer los principios, indicaciones y momento correcto para el tratamiento médico, endovascular o quirúrgico de los ictus isquémicos y hemorrágicos.
- Distinguir entre hallazgos normales y patológicos con RM en la enfermedad cerebrovascular. Reconocer la apariencia típica de las malformaciones vasculares.
- Enumerar las indicaciones de pruebas no invasivas de imagen vascular, incluyendo los ultrasonidos, la angio-RM, la angio-TC.
- Enumerar las indicaciones de arteriografía e interpretar los hallazgos en ictus isquémicos y hemorrágicos. Identificar los segmentos de la carótida incluyendo el cervical alto, petroso, cavernoso y supraclinoidal.

*b) Nivel Medio:*

- Conocer los principios de protección y rescate de la isquemia neuronal.
- Conocer los principios de formulación de hipótesis y análisis estadístico aplicado a los ensayos clínicos, así como la crítica de manuscritos científicos relacionados con la patología cerebrovascular.
- Reconocer las áreas de controversia relacionadas con los protocolos de manejo de pacientes con patología cerebrovascular.

*c) Nivel Avanzado*:

- Demostrar capacidad para interpretar y adaptar los nuevos conocimientos a los paradigmas del manejo de los pacientes con patología cerebrovascular.
- Demostrar un conocimiento maduro durante las sesiones clínicas, sesiones de la especialidad así como en publicaciones y presentaciones científicas.
- Demostrar un conocimiento maduro en las sesiones clínicas, y entender las guías, protocolos y controversias referentes a las modalidades de diagnóstico por imagen y manejo del paciente con patología cerebrovascular.

**.- Competencias en el Cuidado del paciente:**

*a) Nivel Básico*:

- Realizar una historia y exploración clínica general completa y adaptar dicha evaluación a la detección de patología vascular isquémica o hemorrágica.
- Definir qué es urgente y ser capaz de priorizar los diferentes aspectos del manejo de los pacientes con patología isquémica o hemorrágica.
- Manejar las complicaciones cardiopulmonares de pacientes con patología cerebrovascular y consultar a otros especialistas cuando sea oportuno.
- Aplicar los principios de cuidados perioperatorios tras procedimientos endovasculares o quirúrgicos comunes en pacientes con patología cerebrovascular.
- Definir la colocación correcta de la craneotomía en la evacuación de hematomas.
- Ayudar a la apertura, exposición y cierre de procedimientos de carótida cervical.
- Ayudar a craneotomías pterionales para cirugía vascular.
- Ayudar a la evacuación de hematomas intracraneales.
- Llevar a cabo de manera segura y eficaz una angiografía cerebral y espinal diagnóstica con supervisión

*b) Nivel Medio:*

- Realizar la craneotomía pterional para procedimientos vasculares.
- Demostrar capacidad para decidir sobre el manejo de ictus isquémicos y hemorrágicos.
- Aplicar los protocolos de cuidados perioperatorios.
- Interpretar las pruebas diagnósticas invasivas y no invasivas en pacientes cerebrovasculares.
- Formular un planteamiento preliminar y quirúrgico.
- Realizar trépanos o twist-drill para el drenaje ventricular o de hematomas intracraneales.
- Exponer la arteria carótida cervical para endarterectomías y ayudar en la resección de la placa de ateroma y el cierre de la carótida.
- Realizar la craneotomía pterional y comenzar a usar el microscopio realizando la disección microquirúrgica de la fisura de Silvio y de las cisternas basales.
- Realizar abordajes quirúrgicos a otras estructuras vasculares por vías diferentes a la pterional
- Supervisar y ayudar al residente menor en la realización de trépanos y twist-drill.
- Lleva a cabo procedimientos endovasculares básicos con supervisión
- Asumir responsabilidad progresiva en la enseñanza a los estudiantes de medicina, alumnos internos y residentes menores.
- Preparar revisiones bibliográficas para presentación en sesiones y para escribir manuscritos.

*c) Nivel Avanzado:*

- Conocer los conceptos fundamentales de las enfermedades cerebrovasculares durante las sesiones y pases de planta con los adjuntos y estudiantes de medicina.
- Planificar la valoración y el manejo de pacientes con patología cerebrovascular.
- Identificar las indicaciones y controversias de los procedimientos endovasculares, su preparación perioperatoria y el seguimiento.
- Aplicar los principios del manejo anestésico intraoperatorio, control proximal y distal, oclusión arterial temporal y agentes neuroprotectores.
- Completar la planificación, posición y realización de la craneotomía pterional y de otros abordajes para el tratamiento de patologías vasculares.
- Realizar disección microquirúrgica de la fisura de Silvio y exponer las cisternas basales.
- Realizar la exposición y clipaje de aneurismas intracraneales.
- Ayudar en el manejo microquirúrgico de patología cerebrovascular compleja.
- Lleva a cabo procedimientos endovasculares básicos independientemente
- Lleva a cabo procedimientos endovasculares complejos con ayuda
- Planear y ejecutar craneotomías para la evacuación de hematomas intracraneales.
- Describir el tratamiento de lesiones vasculares espinales y ayudar en dichas operaciones.
- Supervisar todos los aspectos del cuidado de pacientes e identificar los casos apropiados para un análisis de morbilidad, mortalidad y realizar dichas sesiones.

**DIAGNÓSTICO Y TRATAMIENTO DEL DOLOR**.

**.- Competencia global:** Conocer el sustrato anatómico y fisiológico del dolor y los síndromes del dolor intratable demostrando la capacidad para formular y ejecutar planes diagnósticos y terapéuticos para el manejar el dolor como síntoma y los trastornos de base que lo originan

# .- Competencias de conocimiento:

## *a) Nivel Básico*:

- Conocer la anatomía y fisiología de la nocicepción a nivel del sistema nervioso central y periférico. Diferenciar las categorías básicas de síndromes dolorosos agudo, crónico, nociceptico, neuropático, miofascial, canceroso y postoperatorio.
- Conocer la historia típica del paciente con neuralgia trigeminal, dolor facial neuropático y dolor facial atípico.
- Conocer la anatomía del sistema trigeminal, así como la anatomía de los nervios intermedio y glosofaringeo.
- Conocer la anatomía del cortex somestésico primario (S1) y la anatomía funcional de los núcleos talámicos ventroposterolateral, ventroposteromedial y ventrocaudales, así como de los núcleos talámicos mediales.
- Conocer el tratamiento médico más apropiado de la neuralgia trigeminal esencial, y el dolor facial de tipo neuropático y atípico.
- Conocer las complicaciones de los procedimientos percutáneos sobre el sistema trigeminal.
- Conocer e identificar las indicaciones primarias de la estimulación de la medula espinal, el nervio periférico y la infusión de opiáceos a nivel intratecal y epidural.
- Conocer las complicaciones relacionadas con la implantación de reservorios y bombas de infusión, así como de electrodos de estimulación.
- Conocer la anatomía del sistema simpático y explicar su implicación en la producción del dolor.
- Conocer la farmacología de los anestésicos locales (lidocaina, bupicaina, procaina, etc) y las indicaciones del bloqueo nervioso periférico.

*b) Nivel Medio*:

- Conocer y diferenciar los fármacos analgésicos mayores, anticonvulsivos, antidepresivos y agentes no esteroideos.
- Reconocer el trasfondo e implicaciones psicosociales de los síndromes dolorosos y las bases del abordaje multidisciplinario.
- Conocer las bases del tratamiento con glicerol, compresión del Gasser o radiofrecuencia de la neuralgia trigeminal.
- Conocer las dianas subcorticales y del tronco cerebral para la estimulación electrica antiálgica y el posible mecanismo subyacente de la analgesia producida.
- Conocer el papel de procedimientos ablativos como la cingulotomía, tractotomia mesencefálica y tractotomía trigeminal en el manejo del dolor crónico.
- Conocer las indicaciones de procedimientos ablativos espinales tales como la lesión de la zona de entrada de las raices posteriores, la cordotomía anterolateral y las mielotomías.
- Describir las indicaciones de estimulación nerviosa periférica.
- Conocer los principios e instrumentación de la lesión por radiofrecuencia; electrodos, temperatura, tiempo de lesión, etc.

*c) Nivel Avanzado*:

- Distinguir con precisión las indicaciones quirúrgicas y no quirúrgicas del tratamiento del dolor.
- Conocer la estrategia relacionada con la indicación de la rizotomía retrogaseriana, y la microdescompresión vascular en el manejo de la neuralgia trigeminal.
- Describir las complicaciones posibles de los procedimientos invasivos espinales antiálgicos (catéteres y electrodos).
- Conocer los efectos colaterales de los opiaceos intraespinales.

# .- Competencias en el Cuidado del paciente

*a) Nivel Básico*:

- Hacer de manera óptima una historia y exploración física de un paciente con dolor, y formular y arbitrar la estrategia de manejo de los síndromes dolorosos básicos.
- Evaluar y diagnosticar un paciente con dolor facial esencial, neuropatico y atípico.
- Asistir en la ejecución de procedimientos percutáneos o por craniectomia de la neuralgia trigeminal.
- Insertar bajo supervisión un catéter epidural espinal, o una bomba de infusión.
- Ayudar en la práctica de una lesión DREZ o cordotomía.
- Ayudar en la implantación de estimuladores de nervio periférico.

*b) Nivel Medio:*

- Formular y aplicar un programa de tratamiento apropiado para síndromes dolorosos complejos como síndrome postdiscectomía.
- Conocer las indicaciones de tratamiento farmacológico más apropiado para los diferentes síndromes dolorosos. Demostrar capacidad para realizar las indicaciones quirúrgicas adecuadas en dichos síndromes.
- Emplear la técnica de Hartel para la práctica de lesion con RF, microcompresión o glicerol en el paciente con neuralgia trigeminal.
- Diagnosticar y formular planes terapéuticos apropiados para el dolor simpaticoreflejo.

*c) Nivel Avanzado*:

- Elegir los abordajes más apropiados para los diferentes síndromes dolorosos.
- Realizar la microdescompresion de los pares V y IX.
- Implantar electrodos espinales tipo alambre y placa.
- Implantar y controlar los sistemas de administración intratecal de drogas.
- Realizar lesiones del DREZ, mielotomia y cordotomía
- Realizar neurotomías, neurolisis y anastomosis de nervios perifericos

**PATOLOGIA INFECCIOSA**.

**.- Competencia global**: Demostrar una comprensión de los factores relacionados con la etiopatogenia, diagnóstico y tratamiento de infecciones en pacientes neuroquirúrgicos, y describir la forma de presentación y el tratamiento de las infecciones más frecuentes.

Pasar revista a los medios para minimizar las complicaciones infecciosas en los pacientes neuroquirúrgicos y demostrar una comprensión de las técnicas usadas para reducir el riesgo de diseminación de infecciones virales, incluyendo la hepatitis y VIH.

# .- Competencias de conocimiento:

*a) Nivel Básico y Medio*:

- Conocer los organismos más frecuentemente implicados en las meningitis según la edad.
- Conocer las infecciones más frecuentes del SNC describiendo las poblaciones de riesgo.
- Conocer en detalle los signos y síntomas asociados con las infecciones del SNC.
- Conocer las indicaciones para alertar a personas en contacto con pacientes que tienen una infección conocida del SNC.
- Conocer las familias de antimicrobianos: las potenciales resistencias, las posibles complicaciones de cada droga, la monitorización precisada en cada uno, la farmacocinética.
- Conocer el modo de transmisión, diagnóstico y tratamiento de infecciones fuera del SNC que suelen aparecer en pacientes neuroquirúrgicos: respiratorias, urinarias, heridas.
- Conocer la prevención, diagnóstico y manejo de la sepsis.
- Conocer las fuentes más frecuentes de fiebre postoperatoria.
- Conocer el manejo del paciente febril.
- Conocer los síntomas, evaluación clínica y manejo de pacientes con infecciones valvulares.
- Conocer las enfermedades por priones y de las precauciones cuando se sospechan.

**.- Competencias en el Cuidado del paciente**

*Nivel Básico y Avanzado*:

- Demostrar capacidad para usar una técnica estéril.
- Diagnosticar y tratar de manera apropiada las infecciones del SNC y fuera del SNC en pacientes neuroquirúrgicos.

NEUROCIRUGÍA FUNCIONAL Y ESTEREOTÁXICA.

**.- Competencia global:**  Definir los procedimientos de neurocirugía estereotáxica y conocer sus aplicaciones. Describir la anatomía, fisiología y presentación de los pacientes candidatos a procedimientos estereotáxicos.

.- Competencias de conocimiento:

*a) Nivel Básico:*

- Conocer la utilidad del marco de estereotaxia en relación a la localización del objetivo o “target” y al propósito del procedimiento (biopsia, craniotomía, funcional, radiocirugía)
- Definir y distinguir cada una de las entidades patológicas objeto de tratamiento con técnicas estreotáxicas: temblor, rigidez, distonía, corea y atetosis.
- Conocer la fisiopatología de la enfermedad de Parkinson y el temblor cerebeloso.
- Conocer los síntomas principales tratables mediante talamotomía ventrolateral (VL) y palidotomías.
- Conocer las ventajas y desventajas de la biopsia estereotáxica en comparación con la biopsia abierta.
- Conocer lo que se considera como epilepsia intratable farmacológicamente
- Conocer el concepto y la técnica de la braquiterapia
- Conocer los conceptos básicos físicos y biológicos de las radiaciones ionizantes y sus efectos sobre los tejidos del sistema nervioso central.
- Conocer el concepto de radiocirugía estereotáxica, enumerar las posibles indicaciones y las complicaciones de la misma, y explicar las diferencias entre radiocirugía y radioterapia convencional

*b) Nivel Medio:*

- Conocer los factores que influyen en la elección de la neuroimagen (TC, RM, angiografía) para realizar procedimientos estereotáxicos
- Conocer los beneficios y limitaciones de los procedimientos estereotáxicos con marco
- Conocer las posibles fuentes de imprecisión en procedimientos estereotáxicos
- Realizar la selección de pacientes susceptibles de recibir talamotomía VL y palidotomía
- Conocer las ventajas y desventajas de los procedimientos ablativos
- Conocer la trayectoria adecuada para realizar biopsias de lesiones de la región pineal, mesencéfalo, protuberancia y bulbo
- Comparar las ventajas y desventajas de los distintos tipos de radiocirugía y la cirugía abierta de tumores y malformaciones vasculares
- Conocer las bases fisiopatológicas de la monitorización electrofisiológica intraoperatoria de las estructuras de fosa posterior, medula espinal, cono medular y raíces nerviosas.
- Conocer las bases fisiopatológicas de la estimulación cerebral en pacientes despiertos y anestesiados

*c) Nivel Avanzado:*

- Conocer las bases e identificar los registros con microelectrodos del tálamo y del globo pálido
- Conocer las indicaciones principales de talamotomía medial y de cingulotomía
- Conocer las indicaciones de colocación de electrodos profundos
- Conocer en detalle el tratamiento quirúrgico de la epilepsia
- Conocer los métodos usados para localizar y penetrar percutáneamente en el foramen oval
- Conocer las posibles ventajas y desventajas de los procedimientos de rizotomías trigeminales: glicerol, radiofrecuencia, compresión con balón
- Conocer la importancia de la relación dosis-volumen en las posibles complicaciones tras la radiocirugía
- Conocer las indicaciones de la radiocirugía para tratamiento de la epilepsia refractaria, la neuralgia del trigémino y los trastornos del movimiento.

# .- Competencia en el Cuidado del paciente:

*a) Nivel Medio*:

- Ayudar a la realización de procedimientos simples de planificación de dosis en radiocirugía
- Realizar biopsias estereotáxicas con marco o navegador

*b) Nivel Avanzado*:

- Ayudar a la realización de procedimientos complejos de planificación de dosis en radiocirugía
- Realizar craneotomías estereotáxicas.

NEUROCIRUGÍA ONCOLÓGICA.

**.- Competencia global**: Demostrar un entendimiento de la anatomía, fisiología, fisiopatología y presentación de los tumores intracraneales y capacidad para formular y poner en práctica un plan de diagnóstico y tratamiento de los tumores intracraneales susceptibles de tratamiento quirúrgico.

# .- Competencias de conocimiento:

*a) Nivel Básico*:

- Conocer la epidemiología, incidencia y factores de riesgo de los tumores intracraneales. Resumir los principios de la biología de los tumores incluyendo los factores genéticos y los procesos bioquímicos asociados con la invasión tumoral. Describir la historia natural de los tumores intracraneales.
- Conocer los diferentes tipos de tumores óseos que afectan al cráneo.
- Conocer y diferenciar:
  - Astrocitomas y otros gliomas, incluyendo la clasificación por grados de la OMS
  - Tumores metastásicos, incluyendo la localización y lugares de origen.
  - Lesiones infecciosas, granulomatosas y quísticas.
- Conocer el origen celular de los meningiomas y sus localizaciones principales.
- Conocer el origen embriológico de los quistes aracnoideos y su historia natural; enumerar las etiologías de otras lesiones cerebrales quísticas, incluyendo las tumorales e infecciosas.
- Conocer la localización anatómica, el origen celular, la presentación clínica, edad de presentación e historia natural de los tumores de la fosa posterior, incluyendo el astrocitoma cerebeloso, el meduloblastoma y el ependimoma y los tumores localizados en el ángulo pontocerebeloso.
- Conocer el origen embriológico de los craneofaringiomas.
- Conocer la presentación clínica de los tumores hipofisarios, el origen celular y las endocrinopatías asociadas con los adenomas no productores, prolactinomas, secretores de ACTH, de TSH, etc, y conocer el manejo médico de los tumores hipofisarios secretores y explicar el papel de la cirugía en los mismos.
- Conocer la etiología de la displasia fibrosa, su presentación y el manejo.

*b) Nivel Medio:*

- Conocer las indicaciones para los abordajes a la base del cráneo en fosa craneal anterior, media o posterior. Identificar las marcas anatómicas más importantes para cada abordaje.
- Conocer el manejo neuroquirúrgico de los tumores de la fosa craneal anterior: meningiomas, displasia fibrosa, estesioneuroblastoma, osteoma del seno frontal, cordoma, mucocele.
- Conocer el abordaje transcondilar.
- Conocer el abordaje transpetroso y la relación de los senos transverso y sigmoides.
- Conocer el manejo quirúrgico del seno frontal expuesto durante la craneotomía de base anterior. Ilustrar el desarrollo y el uso de un colgajo de pericráneo vascularizado y explicar sus indicaciones.
- Conocer el material necesario para el abordaje endoscópico de la base de cráneo. Así como la anatomía nasal y transesfenoidal
- Conocer las bases de la monitorización intraoperatoria de áreas elocuentes (motor, sensitivo, lenguaje)
- Conocer las peculiaridades en perioperatorias de la cirugía del paciente despierto.
- Conocer las bases fisiopatológicas de la fluorescencia del 5-ALA en la resección tumoral asi como sus indicaciones y efectos secundarios

*c) Nivel Avanzado*:

- Conocer las indicaciones para la orbitotomía transcraneal.
- Conocer el manejo quirúrgico y postoperatorio de astrocitomas, otros gliomas, metástasis, granulomas infecciosos y lesiones quísticas pseudotumorales. Pasar revista al papel de la radioterapia, quimioterapia y otros tratamientos adyuvantes.
- Conocer el papel de la cirugía en meningiomas intracraneales y la relación entre las opciones quirúrgicas y la localización tumoral. Hablar de los tratamientos adyuvantes y su eficacia.
- Conocer el tratamiento quirúrgico de los tumores primarios de la fosa posterior como el astrocitoma cerebeloso, meduloblastoma y ependimoma, así como los meningiomas. Conocer las opciones de tratamiento adyuvante y el pronóstico de los diferentes tumores.
- Conocer e ilustrar los diferentes abordajes para los neurinomas del acústico, conociendo las indicaciones de cada uno de ellos.
- Conocer los diferentes abordajes al clivus y revisar las indicaciones de cada uno de ellos. Tener una idea general del manejo de los tumores de clivus y línea media de base craneal.
- Conocer el objetivo del manejo de pacientes con craneofaringioma y los riesgos del tratamiento quirúrgico y del conservador. Describir los diferentes abordajes y las opciones de tratamiento adyuvante, incluyendo la radioterapia y la quimioterapia (sistémica y local).
- Conocer el diagnóstico diferencial de los tumores orbitarios, su localización más usual dentro de la órbita, el manejo médico y los abordajes usados.
- Comparar y contrastar los campos expuestos mediante los abordajes infratemporales pre y postauriculares y las indicaciones de cada uno.
- Conocer el abordaje transnasal-transesfenoidal y sus indicaciones. Definir las opciones de tratamiento para las recurrencias de tumores hipofisarios de todos los tipos.
- Conocer las indicaciones del abordaje endoscópico a las lesiones de la base de cráneo, valorando las ventajas y desventajas respecto a la cirugía abierta.

# .- Competencias en el Cuidado del paciente:

*a) Nivel Básico:*

- Realizar una completa historia clínica y exploración de pacientes portadores de tumores intracraneales, y formular un diagnóstico diferencial en pacientes con masas intracraneales.
- Conocer el manejo preoperatorio de los pacientes que van a ser intervenidos de un tumor cerebral.
- Conocer el posicionamiento de los pacientes en quirófano previo a la intervención quirúrgica.
- Ayudar en la apertura y cierre de craneotomías para tumores sin y con ayuda de la navegación intraoperatoria.

*b) Nivel Medio:*

- Dominar la apertura y cierre de craniotomías. Ayudar en la resección de tumores intracraneales.
- Demostrar capacidad para manejar las complicaciones postoperatorias.
- Valorar la necesidad de una apropiada monitorización pre, intra y postoperatoria.
- Saber cuando consultar a otros especialistas no neuroquirúrgicos sobre problemas que necesiten su valoración en pacientes con tumores cerebrales.
- Ayudar en la puesta en marcha de la tecnología utilizada en el quirófano, incluyendo el endoscopio, el navegador, el estimulador cortical, el aspirador ultrasónico y el microscopio
- Ayudar a la colocación y preparación del paciente que será operado despierto

*c) Nivel Avanzado:*

- Demostrar capacidad para funcionar de manera independiente en todas las fases del manejo de pacientes con tumores cerebrales.
- Resecar tumores supra e infra tentoriales, intra y extraaxiales
- Establecer la indicación y poner en marcha y utilizar la tecnología para la resección de lesiones tumorales
- Realizar o ayudar a la resección de lesiones hipofisarias, bien por endoscopia o por microcirugía.
- Realizar o ayudar en la resección de tumores de la base del cráneo, bien por endoscopia o microcirugía
- Realizar o ayudar en la resección de lesiones tumorales que precisan mapeo intraoperatorio de áreas elocuentes o fluoresecencia por 5-ALA
- Supervisar el manejo pre y postoperatorio de pacientes con tumores intracraneales.

## NEUROCIRUGÍA PEDIÁTRICA

**.- Competencia global**: Demostrar entendimiento de la anatomía, fisiología, fisiopatología y presentación de las enfermedades de los niños en las que un neurocirujano puede ser requerido para su diagnóstico y tratamiento y capacidad para formular y llevar a cabo un plan de diagnóstico y tratamiento para dichas enfermedades.

# .- Competencias de conocimiento:

a) Nivel Básico:

- Conocer la embriología del SNC y las estructuras que lo contienen.
- Conocer las anomalías congénitas y del desarrollo que trata el neurocirujano que incluyen: mielomeningocele y sus variantes, meningocele, encefalocele, malformación de Chiari, disrafismos ocultos, anomalías de la división medular, anomalías de segmentación, síndromes craneofaciales y facomatosis
- Hidrocefalia y otras alteraciones de la circulación de LCR:
- Conocer la dinámica normal de la PIC y establecer un diagnóstico diferencial de los trastornos de la circulación del LCR.
- Conocer las diferentes etiologías (congénita y adquirida) y la fisiopatología de la hidrocefalia, su incidencia y las opciones de tratamiento.
- Conocer los tipos de derivaciones de LCR (internas tipo ventriculostomía y los sistemas de derivación externa)
- Conocer la aproximación diagnóstica al paciente con sospecha de malfunción valvular.
- Neoplasias:
- Conocer las diferencias entre los tumores pediátricos y adultos.
- Conocer los tumores más frecuentes en niños por edades y sus localizaciones típicas.
- Clasificar los tumores por grado de malignidad, papel del tratamiento quirúrgico o no quirúrgico, pronóstico tras su tratamiento óptimo.
- Infección:
- Conocer la presentación de una infección valvular y los microorganismos más comunes.
- Conocer los planes de tratamiento para dichas infecciones.
- Conocer los factores de riesgo de infección valvular y el protocolo diagnóstico.
- Conocer las presentaciones más frecuentes de las infecciones intracraneales e intraespinales.
- Otras:
- Conocer los diferentes tipos de espasticidad y trastornos del movimiento de los niños.
- Conocer las opciones quirúrgicas y no quirúrgicas para el tratamiento de la espasticidad.
- Conocer la fisiopatología de las craneosinostosis.
- Cerebrovascular:
- Conocer las posibles causas de un hematoma o hemorragia subaracnoidea no traumática.
- Conocer las localizaciones y tipos de aneurismas más frecuentes en niños.
- Conocer las posibles presentaciones de los aneurismas de la vena de Galeno, su diagnóstico y su manejo.
- Conocer la fisiopatología, tratamiento y pronóstico de la hemorragia intraventricular en los neonatos.
- Trauma:
- Conocer los factores de la historia clínica y exploración que hacen sospechar que el traumatismo no ha sido accidental
- Conocer el manejo de la columna cervical del niño comatoso.
- Conocer la anatomía de la columna del niño que hace que la epidemiología de las lesiones medulares sea diferente a la de los adultos.
- Conocer las lesiones más comunes por traumatismo en el parto y su diagnóstico y manejo.
- Conocer el manejo de las fracturas craneales deprimidas abiertas y cerradas
- Conocer el diagnóstico y manejo de los traumatismos de la columna vertebral
- Conocer el diagnóstico y manejo de la lesión medular sin anomalías radiológicas (SCIWORA)

*b) Nivel Medio:*

- En relación con el mielomeningocele y sus variantes, meningocele, encefalocele, malformación de Chiari, disrafismos ocultos, anomalías de la división medular, anomalías de segmentación, síndromes craneofaciales y facomatosis:
- Conocer las indicaciones de cirugía, opciones quirúrgicas y pronóstico esperado.
- Conocer las indicaciones y la utilidad de la monitorización intraoperatoria.
- Conocer la fisiopatología y la presentación del síndrome de médula anclada.
- Hidrocefalia y otras alteraciones de la circulación del LCR:
- Conocer el síndrome de los “ventrículos en hendidura (“slit ventricle”) y cómo se diagnostica y maneja.
- Conocer las enfermedades que comúnmente se asocian a hidrocefalia.
- Neoplasia:
- Conocer el diagnóstico diferencial de tumores del área supraselar, región pineal e intraventriculares y las opciones de tratamiento incluyendo los abordajes quirúrgicos
- Conocer la evaluación y el tratamiento adecuados para los tumores asociados a neurofibromatosis, esclerosis tuberosa, von Hippel Lindau
- Conocer el pronóstico a largo plazo de los tumores cerebelosos e infratentoriales.
  - Infección:
- Conocer los diferentes patrones de infección en pacientes inmunocomprometidos frente a inmunocompetentes.
- Conocer las secuelas de la infección del SNC, tanto las valvulares como el resto.
- Conocer el papel de la osteomielitis en la infección del SNC,
- Conocer las pruebas diagnósticas que se usan para el diagnóstico de una infección valvular
- Otras:
  - Conocer la evaluación y el plan preoperatorio para el tratamiento de la epilepsia médicamente intratable
  - Conocer las variaciones en el manejo de focos epilépticos tumorales frente a los no tumorales.
  - Conocer las opciones quirúrgicas para el manejo de la espasticidad.
- Cerebrovascular:
- Conocer la nomenclatura de las anomalías congénitas vasculares.
- Conocer la patología, factores de riesgo, diagnóstico y tratamiento de la enfermedad de moyamoya en niños,
- Conocer las facomatosis que tienen asociadas anomalías vasculares y su tratamiento,
- Conocer las opciones de manejo en el tratamiento de las enfermedades vasculares en los niños.
  - Trauma:
- Conocer el manejo de las fístulas de LCR postraumáticas.
- Conocer el diagnóstico y tratamiento de los quistes leptomeníngeos traumáticos.
- Discutir la utilidad de drenajes lumbares y craniectomías descompresivas.
- Describir el manejo quirúrgico y no quirúrgico de los hematomas intracraneales traumáticos.

*c) Nivel Avanzado*:

- - - Hidrocefalia y otras alteraciones de la circulación del LCR:
      - Diferenciar entre ventriculomegalia obstructiva e hidrocefalia compensada.
      - Conocer la presentación y manejo diagnóstico y terapéutico del pseudotumor cerebri.
        - Neoplasia:

Conocer la anatomía quirúrgica necesaria para los abordajes de tumores en región supraselar, región pineal e intraventriculares.

Conocer el papel de la ventriculostomía del tercer ventrículo en el manejo de la hidrocefalia.

Conocer el papel de la radiocirugía en el manejo de algunos tumores.

Conocer la presentación de hamartomas hipotalámicos y el papel de la cirugía.

Conocer las opciones de monitorización intraoperatoria y su eficacia.

**.- Competencias de Cuidado del paciente:**

*a) Nivel Básico*:

- Realizar una historia clínica y exploración en neonatos, niños pequeños y niños mayores.
- Realizar punciones subdurales, intraventriculares, lumbares y reservorios valvulares en niños.
- Realizar twist drill o trépanos para drenajes ventriculares.
- Realizar cranio o craniectomías para evacuar hematomas y lesiones subdurales, epidurales e intraparenquimatosas.
- Colocar y revisar válvulas ventriculoperitoneales, a yugular o pleura.
- Realizar laminectomías.
- Completar una suturectomía sagital.

*b) Nivel Medio y Avanzado (participará como ayudante en la mayoría de los procedimientos):*

- Cerrar defectos de cierre del tubo neural craneales y espinales.
- Reparar encefaloceles intracraneales.
- Realizar ventriculostomías endoscópicas en casos no complicados.
- Aplicar y utilizar la estereotaxia para la localización de lesiones o la colocación de válvulas.
- Reparar una malformación de Chiari.
- Realizar un procedimiento de desanclaje medular no complicado.
- Colocar las bombas de infusión intratecal de baclofeno.
- Exponer lesiones supraselares, pineales e intraventriculares, de fosa posterior y supratentoriales no complicadas.
- Reparar médulas ancladas complejas (lipomielomeningocele, reanclajes, diastematomielia) y exponer tumores espinales intradurales.
- Realizar rizotomías para espasticidad.
- Ayudar en cirugía craneofacial compleja.

# NEUROTRAUMATOLOGÍA Y CUIDADOS DEL ENFERMO NEUROQUIRÚRGICO CRÍTICO.

**.- Competencia global**: Demostrar entendimiento de la anatomía, fisiología, fisiopatología y presentación de las lesiones traumáticas del cerebro, médula espinal y sistema nervioso periférico incluyendo las estructuras que los soportan y capacidad para formular un diagnóstico apropiado y aplicar un plan terapéutico, incluyendo el manejo quirúrgico y el no quirúrgico de las mismas.

## .- Competencias de conocimiento:

*a) Nivel Básico:*

- Conocer la valoración sistémica y conocer las prioridades de manejo del paciente politraumatizado. Discutir los principios de resucitación del politraumatizado.
- Conocer los fluidos intravenosos a administrar en un paciente recién ingresado en una UCI.
- Conocer la modalidad de ventilación inicial apropiada para diferentes tipos de pacientes.
- Conocer los mecanismos de acción y las potenciales complicaciones de las drogas vasoactivas, los agentes hipotensores, los sedantes, paralizantes y analgésicos usados más frecuentemente.
- Conocer las indicaciones, ventajas y riesgos de los diferentes sistemas de monitorización hemodinámica usados en los pacientes críticos (catéteres pulmonares, vías arteriales...)
- Conocer los principios básicos del manejo de pacientes con lesión medular.
- Conocer la evaluación y tratamiento de la hemorragia subaracnoidea espontánea y traumática.
- Formular un plan de diagnóstico y tratamiento para los pacientes con isquemia cerebral.
- Definir la muerte cerebral y los métodos de diagnóstico.

*b) Nivel Medio:*

- Conocer la fisiopatología de la hipertensión intracraneal y explicar un plan de manejo.
- Conocer las prioridades de manejo en los politraumatizados con traumatismo grave neuroquirúrgico y sistémico.

## .- Competencias en el Cuidado del paciente:

*a) Nivel Básico:*

- Realizar la historia clínica, la exploración y pruebas de imagen pertinentes.
- Insertar catéteres intravasculares para la monitorización y el manejo hemodinámico.
- Colocar sensores de monitorización de presión intracraneal.
- Realizar trépanos o twist-drills para el drenaje de colecciones subdurales.
- Indicar qué pacientes necesitan una craniotomía de urgencia y otros procedimientos.
- Iniciar el procedimiento quirúrgico si el neurocirujano más experto aún no ha llegado.
- Ayudar a la apertura y cierre de craneotomías.
- Realizar traqueostomías regladas y poder hacerlas de urgencia si es necesario.
- Intubar a pacientes de manera urgente y de forma electiva.

*b) Nivel Medio*:

- Realizar los siguientes prodecimientos quirúrgicos en casos no complicados:
  - Craneotomías en hematomas epidurales y subdurales, intracerebrales o contusiones.
  - Craneotomías para fracturas deprimidas.
  - Craniectomías descompresivas.
  - Cranio/craniectomías para hematomas de fosa posterior.
  - Cranioplastia simple.
- Manejar las fracturas de base de cráneo con fístulas de LCR.

*c) Nivel Avanzado:*

- Realizar los procedimientos del nivel medio pero en casos complicados.
- Reconstruir defectos craneales y de base craneal complejos, con la ayuda de otros especialistas si es preciso.
- Liderar en equipo de cuidados críticos en el manejo de politraumatismos.

CIRUGÍA DEL SISTEMA NERVIOSO PERIFÉRICO.

**.- Competencia global**: Demostrar el entendimiento de la anatomía, fisiología, fisiopatología y presentación de las enfermedades del Sistema Nervioso Periférico, y capacidad para formular un plan diagnóstico y terapéutico para las enfermedades del Sistema Nervioso Periférico susceptibles de tratamiento quirúrgico.

# .- Competencias de conocimiento:

*a) Nivel Básico*:

- Conocer los elementos estructurales del nervio periférico: epi, peri y endoneuro, axón, fascículo, célula de Schwann, tejido conectivo, placa motora, receptor sensitivo.
- Conocer el potencial de acción.
- Conocer las diferentes fibras nerviosas según el tamaño y conocer el significado funcional.
- Conocer las respuestas fisiopatológicas a las diferentes lesiones nerviosas.
- Conocer la degeneración Walleriana.
- Conocer la regeneración neuronal: factores y tasa de crecimiento, remielinización.
- Conocer los signos y síntomas de las lesiones nerviosas típicas: Síndromes de atrapamiento, laceraciones, lesiones por inyecciones.
- Distinguir los signos y síntomas de motoneurona superior e inferior.
- Conocer los nervios periféricos mayores del organismo y su inervación motora y sensitiva.
- Conocer y dibujar los componentes del plexo braquial.
- Describir las diferentes modalidades sensitivas y la forma de explorarlas.
- Conocer los síndromes de atrapamiento: túnel del carpo, cubital, femorocutáneo, peroneo.
- Conocer el tratamiento quirúrgico y no quirúrgico de los síndromes de atrapamiento.

*b) Nivel Medio:*

- Conocer el Sistema Nervioso Autónomo: Diferenciar Simpático y Parasimpático
- Conocer las diferencias y similitudes entre los nervios periféricos y los craneales.
- Conocer y dibujar los componentes del plexo lumbar.
- Conocer el uso del EMG y VCN en el manejo de las lesiones del nervio periférico.
- Clasificar los tumores del nervio periférico.
- Conocer las prioridades de resultado de la cirugía del plexo braquial.
- Conocer las técnicas de reparación de nervios: coaptación directa, implante, transferencias, reparación epineural, reparación fascicular

*c) Nivel Avanzado*:

- Conocer con ayuda de diagramas la anatomía del SNP: sitios de atrapamiento, plexos braquial y lumbar, inervación de la vejiga.
- Conocer el uso de los injertos nerviosos.
- Conocer el síndrome del estrecho torácico.
- Conocer la descompresión del nervio cubital: in situ, transposición, epicondilectomía.
- Formular un plan de manejo de: lesiones nerviosas agudas, lesiones crónicas, descompresión fallida, neuroma nervioso.
- Conocer el manejo de los tumores nerviosos.
- Conocer los tratamientos adyuvantes en lesiones nerviosas: transferencias musculares y tendinosas, prótesis, fusiones articulares.

# .- Competencias en el Cuidado del paciente

*a) Nivel Básico*:

- Obtener una historia y una exploración motora y sensitiva del SNP.
- Localizar la lesión anatómicamente según la historia y exploración.
- Formular un diagnóstico diferencial de los síndromes de atrapamiento.
- Llevar a cabo una biopsia de músculo o de nervio periférico.
- Obtener nervio sural para injertos.

*b) Nivel Medio*:

- Cuidar en el pre y el postoperatorio a pacientes con lesiones de nervios periféricos.
- Realizar una neurolosis / descompresión.
- Exponer el plexo braquial lateral.
- Manejar el dolor asociado a lesiones nerviosas.

*c) Nivel Avanzado:*

- Llevar una consulta de lesiones de nervios periféricos.
- Realizar descompresiones nerviosas: túnel de carpo, cubital en el codo, peroneo.
- Realizar reparaciones nerviosas.
- Escindir un tumor de vaina nerviosa.
- Exponer el plexo braquial lesionado.
