# Supplementary material
Source: Elsevier journal article supplement (https://www.sciencedirect.com/science/article/pii/S1130147316000233)
Supplement: mmc3 [file S1130147316000233:mmc3.docx]

**ANEXO 2 del Programa de formación en Neurocirugía**

**METODOLOGÍA DE EVALUACION DEL RESIDENTE, DEL STAFF DOCENTE Y DEL PROGRAMA**

**Acrónimos usados en este documento: EBCs:**  enseñanza basada en competencias; **EME**: Evaluación por Miembro del Equipo; **miniCEX:** mini Clinical Evaluation Exercise; **miniPAT**: miniProfessional Assesment Tool; **PAME:** Patient Assessment and Management Examination; **OSATS**: Objective Structured Assessment of Technical Skills; **ODPP**: Observación Directa de Procedimiento Práctico

**Índice**

1. Evaluación del residente ……………………………....…………………..….……………..…. Pág 1
2. Aplicación de la estrategia evaluadora …………………………………………………… Pág 7
3. Evaluación por parte del residente de la dedicación docente del tutor y

el staff, y del programa docente ……………….………………………………….……..…. Pág 14

3. APÉNDICES

Apéndice 1. Pruebas de evaluación clínica objetiva estructurada,

Evaluación 360º y Autoevaluaciones ……………………………………….….….…… Pág 16

Apéndice 2. Escalas globales para la evaluación periódica de las

competencias nucleares ………………..………….. …………………………………….…. Pág 30

Apéndice 3. El portafolio docente ………………………………………….……….…… Pág 35

El presente Anexo 2 detalla los instrumentos y la estrategia de evaluación mencionados en el texto del Programa, donde ya se apuntó que la evaluación de las competencias se lleva a cabo utilizando diferentes instrumentos aplicados por distintos observadores en diferentes contextos y momentos del trabajo diario y del recorrido formativo del residente (estrategia de “triangulación”). Se explicita quienes son los responsables de aplicar los instrumentos de evaluación y se aportan matrices cruzadas que relacionan dichos instrumentos con las competencias a evaluar y los momentos más adecuados para aplicarlos a lo largo de la residencia. Aunque idealmente podrían utilizarse todos los instrumentos se propone una relación de mínimos de evaluación a cumplimentar (página 13). De todas las evaluaciones, sólo los tests de conocimiento tendría carácter sumativo (determinar si el residente pasa-no pasa), adjudicándose un propósito formativo y de verificación del progreso en los niveles de competencia (y enmienda en caso de deficiencia) al resto de las herramientas. A continuación se describen los **instrumentos de evaluación del nivel de competencia del residente**.

**1) Evaluación del Conocimiento**

La evaluación del **conocimiento médico** se hace con tests escritos que utilizan preguntas de diferentes formatos (elección múltiple-respuesta única o múltiple, de respuesta corta, de apareamiento múltiple - “extended matching questions” -, del tipo “script concordance” u otros) para medir tanto el conocimiento de datos, como la capacidad para contextualización clínica de los mismos (juicio y razonamiento clínico, elaboración del plan para el mejor manejo diagnóstico y terapéutico, toma de decisiones). Los diseñadores de los tests se referirán a los tramos de conocimientos y habilidades para el cuidado del paciente reflejados en el programa y su Anexo 1. Los tests incluidos en el programa serían: uno diseñado por los responsables del tronco de cirugía, y otros dos a pasar en los años 3º y 6º año de residencia, siendo obligatoria la superación del último para otorgar el título de especialista (examen tipo Board).

El banco de preguntas controlado por el Comité de Programa de la SENEC se podrá utilizar, bien a nivel local (en cada servicio), o bien tan solo a nivel nacional, según sea la estrategia final adoptada para administrar estos exámenes. La posibilidad de utilizar el banco para autoevaluación del residente y la de aplicar una **prueba oral** al final de la residencia, como se hace en otros países, queda a elección del Comité de Programa.

**2 ) Pruebas de evaluación clínica objetiva estructurada con enfermo real y de procedimientos técnicos** (distintos de los propiamente quirúrgicos)

La competencia para la entrevista clínica (recogida de la historia y exploración física), la comunicación con el paciente, el profesionalismo, el juicio clínico y la habilidad para el manejo clínico global y la eficiencia en la utilización del tiempo, se pueden evaluar con el miniCEX (miniClinical Evaluation Exercise), introducido por J Norcini para su uso en el Postgrado. En esta prueba el evaluador observa la actuación del residente con un enfermo real y procede después a dar retroalimentación inmediata sobre la actuación y a discutir brevemente el diagnóstico diferencial y el manejo diagnóstico y terapéutico. En la variante de la Discusión Basada en un Caso, el residente no entrevista al enfermo, sino que describe y discute con el evaluador la presentación clínica, los hallazgos de la exploración física, el diagnóstico diferencial y el manejo diagnóstico y terapéutico de un paciente conocido por ambos –evaluador y residente –, finalizando la prueba con retroalimentación inmediata y constructiva. En la Observación Directa de Procedimiento Práctico, que puede ser pasada por enfermeras, residentes y los miembros del staff, el evaluador puntúa una serie de habilidades técnicas tras observar el desempeño del residente en la actividad de que se trate (e.g. colo cación de un drenaje lumbar o reparación de una herida). Estas pruebas son más aplicables y útiles en los dos primeros años de la residencia.

Los PAMEs (Patient Assessment and Management Examination), en los que se recurre al uso de enfermos estandarizados, evalúan estas mismas competencias, pero además contemplan la capacidad del residente para explicar y acordar con el paciente el plan de manejo, describir el procedimiento quirúrgico y las posibles complicaciones.

En el OSATS (Objective Structured Assessment of Technical Skills), se evalúa la competencia para ejecutar partes de una operación, o un procedimiento completo quirúrgico con ayuda de simuladores. Las opciones de evaluación utilizando simuladores, que son muy variadas, pueden repetirse sin límite al evitar la exposición del paciente a riesgos innecesarios. En el **Apéndice 1** de este Anexo se presentan los formularios para la aplicación de estas pruebas y se describen más en detalle los pasos de los PAMEs y OSATSs

**3) Evaluaciones de la competencia con Escalas Globales**

Este programa adopta escalas globales utilizadas en EEUU y otros países para calificar al residente en relación con seis dominios competenciales mayores y otras competencias transversales tales como la recogida, registro e interpretación de datos, conocimiento, habilidades clínicas en el manejo del paciente, y actitudes y conducta profesional. Estas escalas son similares a la llamada Clinical Performance and Professional Behavior Scale (CPPB) utilizada en servicios de cirugía en EEUU. En el **Apéndice 2** de este Anexo se presentan dos escalas globales que se cumplimentaran una o dos veces por año por el mismo supervisor docente.

**4) “Audits” realizados sobre los registros (informes) clínicos emitidos por el residente**

Los **registros (informes)** médicos archivan información sobre la historia clínica, exploración física, diagnóstico diferencial, solicitud e interpretación de pruebas de laboratorio e imagen y otras exploraciones, prescripciones, indicaciones terapéuticas y plan de seguimiento a largo plazo. Así, el análisis o **“audit”** de estos informes es muy útil para estimar la competencia del médico para la toma de las decisiones clínicas, el uso adecuado de los recursos y el manejo global del paciente. Además, los audits del propio trabajo, (“self audit”), o del realizado por otros residentes y estudiantes a su cargo (“peer-audit”), son fundamentales para el feedback del residente porque promueven la autoreflexión y la implicación activa en la monitorización de su propia práctica clínica. La utilidad de este tipo de evaluación parece más importante en un momento en que diferentes estudios registran un deterioro progresivo del proceso de recogida de los datos del enfermo tanto en el encuentro inicial como en el seguimiento y la transferencia diaria de la información entre los componentes del equipo (“handoff”) que se ha relacionado con la restricción del horario laboral del residente y la introducción del sistema de turnos, entre otros factores.

El examen retrospectivo de algunos registros efectuados por el residente, tanto de enfermos ingresados a su cargo, como de los estudiados en régimen ambulatorio, es básico para evaluar no sólo el Cuidado del paciente, sino una de las competencias nucleares más “escurridizas” o difíciles de medir con los otros instrumentos de evaluación objetiva estructurada, como es el Aprendizaje basado en la práctica y perfeccionamiento. Por ello, este programa recomienda analizar entre 3 y 5 registros del residente por año de residencia con fines tanto formativos como sumativos, si se decide utilizarlos para este propósito también (pasa-no pasa).

Actualmente la mayoría de los hospitales disponen de historia electrónica por lo que los “audits” se harán sobre esta fuente y no sobre historias en papel. Al evaluar los registros no hay que olvidar que estos serán tan buenos como la información que contienen, y que algunos aspectos importantes del encuentro clínico no quedan reflejados impidiendo evaluar competencias que en realidad sí posee el residente. Por ejemplo, la descripción de una exploración cardiaca reflejada en el registro dice poco, o no lo dice todo, sobre la verdadera habilidad del residente para examinar el corazón, y por ello resulta imprescindible la entrevista personal al realizar la revisión de los registros y emitir un juicio sobre la competencia.

No hay reglas fijas para evaluar los registros clínicos pero en un intento de estandarización se creó la **Gradilla de Estructuración del registro o “Audit”** que se muestra a continuaciónque puntua los ítems 1, 2 y 3 de 1 = Malo a 5 = Excelente. El item Discordancias se contesta: Ninguna relevante, Alguna, Muchas. Las respuestas del residente a las preguntas del examinador se puntúan también de 1 (respuesta pobre) a 5 (respuestas ajustadas y precisas)

**Residente: Fecha:**

**Diagnóstico del caso: Año de Residencia:**

1. Organización y claridad del registro ( )

*( Está bien estructurado ? Es apropiado y consistente ? Es legible ?)*

1. Contenidos ( )

*(Están explicados con suficiente detalle los datos clínicos ?. Falta*

*cualquier tipo de información esencial ?)*

1. Consistencia interna ( )

*(Los datos clínicos siguen una secuencia lógica a los largo del registro ?)*

1. Discordancias ( )

*(Hay maniobras o decisiones que estén en desacuerdo con el resto de la información proporcionada en el registro ?)*

1. Preguntas al residente ( )

*(Escriba hasta cinco preguntas que le gustaría plantear al residente en relación con el razonamiento y el juicio clínico)*

**5) Evaluación 360º (“**multi-source feedback”**)**. Este recurso evaluador sirve para recoger información sobre el nivel competencial del residente desde diferentes fuentes que idealmente debe ir seguida de retroalimentación administrada directamente por el observador o por el tutor. Los cuestionarios empleados recogen datos acerca de conductas específicas del residente y de los “constructos” profesionales más genéricos o competencias nucleares (e.g. habilidades de comunicación, profesionalismo, y capacidad para el trabajo en equipo). Los evaluadores pueden ser pacientes, familiares de pacientes, colegas médicos (e.g. staff, residentes, estudiantes) y trabajadores sanitarios no médicos (enfermeras y otros) que tienen distintas perspectivas del desempeño del residente ya que trabajan y observan a este desde atalayas diferentes; además, con frecuencia están en posiciones más próximas al residente que el propio supervisor docente, y tienen menos sesgos que éste para emitir los juicios y proporcionar información, que al ser obtenida con diferentes ángulos y enfoques (360º), reducen el sesgo inherente a la estrategia de “one person - one perspective”. Una vez más, los agregados de las informaciones se deben utilizar no sólo para puntuar, sino para proporcionar feedback al residente.

Los diferentes observadores (e.g. paciente o colega) pueden responder a distintos, o a los mismos items. Por ejemplo, las enfermeras proporcionan información acerca de cuidado del paciente, colaboración interprofesional, profesionalismo y comunicación, mientras que los colegas residentes responden bien acerca de esos mismos items y otros tales como conocimiento médico, habilidades técnicas, disposición para la ayuda y gestión de problemas y el uso de los recursos. A continuación se muestran, a título de orientación, ejemplos de ítems que forman “constructos”.

| **CONSTRUCTO** | **Fuente** | **Ejemplos de items** |
| --- | --- | --- |
| **Comunicación** | Pacientes | . Este doctor supo escucharme  . Respondió a mis preguntas |
|  | Enfermeras, estudiantes, otros | . Se comunica verbalmente de manera efectiva con otros profesionales  . Es accesible para obtener comunicación apropiada sobre los pacientes |
|  | Colegas médicos (residentes, staff del propio servicio u otros servicios) | . Los registros clínicos están bien construido y son legibles  . Proporciona consejos útiles a los colegas cuando es requerido sobre decisiones clínicas difíciles |
| **Profesionalismo** | Pacientes | . Me trató con respeto  . Respetó mi privacidad |
|  | Enfermeras, estudiantes, otros | . Respeta el conocimiento y habilidades de los trabajadores no médicos  . Acepta y asume la responsabilidad sobre el cuidado del paciente |
|  | Colegas médicos (residentes, staff) | . Acepta y comparte el trabajo de manera apropiada  . Asume la responsabilidad de sus propias acciones |
| **Trabajo en equipo o colaboración interprofesional** | Colegas médicos | . Respeta el papel de los otros y trabaja constructivamente en el equipo  . Delega de forma efectiva y se comunica bien  . No tiene prejuicios, da apoyo y es justo |

Este Programa prescribe que los diferentes evaluadores (enfermeras, miembros del staff del servicio, estudiantes de cursos avanzados) cumplimenten varias veces por año el formulario de **Evaluación por Miembros del Equipo (EME)** incluido en el Apéndice 1. Este instrumento evalúa una serie de competencias y actitudes del residente que escapan a las pruebas convencionales de evaluación clínica objetiva estructurada mencionadas más arriba, permitiendo otorgar una base más amplia al feedback. Además, los miembros del staff cumplimentarán dos veces por año el formulario llamado **miniPAT (mini peer assessment tool),** incluido también en el Apéndice 1.

***Limitaciones de la evaluación 360º a tener en cuenta a la hora de su aplicación***: Las observaciones al azar y por diferentes actores conllevan una falta inherente de estandarización que crea problemas de tipo psicométrico (determinación de la validez de las observaciones). Otra limitación de la evaluación 360º proviene de la “familiaridad” entre el observador y el observado (residente colega, enfermera, paciente “afecto”, etc) que lleva con frecuencia a un sesgo de sobrepuntuación (“leniency effect”) y a evitar juicios demasiado adversos, aún cuando estos estuvieran claramente indicados. Una queja común es el rechazo de los residentes a ser evaluados por personal no médico, pero todas estas limitaciones se aminoran cuando se logra instalar una “cultura” de compromiso y “aceptación” de la importancia de estas evaluaciones en los servicios clínicos.

**6) “Milestones”**

En el Programa se comenta que el **juicio holístico** del supervisor clínico es imprescindible para evaluar la capacitación del residente en un momento dado de su formación o al final de la misma, y que esa valoración “global” del nivel de desempeño en los diferentes dominios competenciales ha de complementar la evaluación de la competencia obtenida con otros instrumentos particulares. Hasta la introducción del paradigma de la EBCs la valoración holística se hacía sin referencia a criterios que permitieran estandarizarla, por lo que en los últimos años se han diseñado instrumentos para evaluar, o bien la conducta del residente en un dominio competencial determinado (con las llamadas “milestones”), o bien actividades clínicas concretas que desempeña (con las llamadas “entrustable professional activities” o EPAs) en relación en los diferentes dominios competenciales. En ambos casos, conducta o actividad concreta, han de resultar observables y medibles.

El término “milestone” (traducible como piedra miliar, jalón o señalizador) se define como un descriptor de conducta observable utilizado como marcador de progreso del residente en su trayectoria formativa y señala el nivel de ejecución (conducta) alcanzado en relación con un dominio competencial determinad. Este nivel se clasifica de 1 a 5, siendo el nivel 4 a alcanzar en el cronograma que predetermina el progreso del residente. El valor y la aceptación de las “milestones” se relaciona con: 1) La descripción de las competencias en términos de conductas observables que son importantes (“make sense”) para residentes y evaluadores; 2) La aportación de un mapa de ruta para el residente; y 3) Su contenido especifico que proporciona la base para administrar feedback formativo y realizar la evaluación

De la mano del ACGME todas las especialidades han elaborado mapas de “milestones” que son utilizados actualmente de manera obligatoria por los supervisores docentes para emitir juicios holísticos sobre el nivel de competencia de los residentes en los diferentes momentos del trayecto formativo. Así, desde el verano del 2013 la Neurocirugía es una de las siete primeras especialidades que utilizan de manera rutinaria la evaluación con “milestones” en los EEUU, remitiendo cada 6 meses los resultados a un departamento centralizado del ACGME.

Este programa prescribe la evaluación semestral obligatoria con “milestones” de neurocirugía de todos los residentes. Así mismo, prescribe la evaluación con algunas de las “milestones” de intervencionismo endovascular (Anexo 3); de estas últimas podrían evaluarse tan solo los tres primeros niveles considerando como óptimo el nivel 3, y dejando los niveles 4 y 5 para aquellos que se quieran dedicar al intervencionismo. Los resultados, que serán recogidos en el Libro del Residente y remitidos por el tutor al Comité de Programa de la SENEC. El documento con la traducción de las “milestones” usado en los EEUU se incluye en el Anexo 3 del Programa.

**7) Autoevaluación del residente sobre su propia competencia**

La literatura relacionada demuestra el alto valor y la validez de los cuestionarios, escalas y otros recursos de autoevaluación, y cómo no necesariamente el candidato sobrevalora su propia capacidad al realizarla. En todo caso, el agregado de la autoevaluación tiene un importante significado, tanto para valorar el progreso en la trayectoria de aprendizaje individual, como para establecer comparaciones entre los componentes de un grupo (“benchmarking” de residentes). Obviamente, los supervisores docentes contrastan los resultados de la autoevaluación con los obtenidos en las pruebas objetivas estructuradas.

Teniendo en cuenta que el residente hará guardias en el “pool” de cirugía en el primer tramo de la residencia, lo que le permitirá seguir mejorando sus conocimientos y competencias en relación con el tronco quirúrgico, se le requiere para que cumplimente, al finalizar el 1º y 2º año, el formulario de autoevaluación de competencias en cirugía-atención al enfermo grave-politraumatizado incluido en el**Apéndice 1**, junto otras escalas de autoevaluación para usar en el periodo específico y elminiPAT cuyo formulario se aporta también en este Apéndice.

**8) El Libro del Residente**

En el **Apéndice 3** de este Anexo se comenta brevemente el perfil del verdadero portafolio docente cuya utilización queda a elección de cada servicio. De no emplear este instrumento, queda como obligatorio el uso del **Libro del Residente** que deberá incluir los siguientes componentes: 1) Resultados de los tests teóricos; 2) Hojas de evaluación clínica con escalas globales pasadas periódicamente; 3) Resultados de pruebas de evaluación clínica objetiva estructurada con enfermo real o simulado (miniCEX y otras); 4) Resultados de los “audits”; 5) Resultados de la evaluación con “milestones”; 6) Evaluaciones 360º; 7) Autoevaluaciones; 8) Asistencia a Cursos de formación; 9) Presentaciones en congresos y publicaciones; y 10) Intervenciones quirúrgicas en las ha haya participado como ayudante o primer cirujano.

**APLICACIÓN DE LA ESTRATEGIA EVALUADORA**. Ya se ha comentado tanto en el Programa, como en este Anexo, que el carácter multifacético de la mayoría de las competencias (integran habilidades, actitudes y conductas del residente), exige aplicar una estrategia en la que distintos observadores utilizan diferentes pruebas en diferentes contextos y momentos del periodo formativo. A continuación se detallan el alcance evaluador de los diferentes instrumentos y pruebas de evaluación incluidos en este Programa (qué competencias evalúan), y la frecuencia y los responsables de su aplicación. Además, se aportan dos matrices que cruzan estos parámetros entre sí.

**Tests teóricos (combinados o no con exámenes orales)**.

**Qué evalúan**:

1. Conocimientos abstractos (datos)
2. Conocimientos contextualizados a la realidad clínica (incluye prescripción de fármacos)
3. Capacidad de juicio y razonamiento clínico
4. Toma de decisiones (al igual que en los “situational judgement tests”, se utilizarán preguntas múltiples o viñetas que estimen la capacidad del residente para resolver una situación clínica más o menos compleja, incluyendo aspectos de ética médica, profesionalismo y asunción de responsabilidades, riesgos diversos, trabajo en equipo y otros problemas organizativos o de priorización y utilización del tiempo y los recursos)

**Responsables de la aplicación**: Los tests serán preparados por el Comité de Programa que recogerá preguntas de diferentes tipos aportadas de manera voluntaria por los staff de los servicios cuya calidad será verificada para crear un banco a nivel nacional. El Comité de Programa circulará y corregirá los tests y/o registrará los resultados que serán comunicados al residente y sus tutores.

**Observación directa estructurada de las actuaciones del residente**. (miniCEX, Discusión basada en Caso, ODPP, PAME, OSATS, Casos Centinela, miniPAT, multifacética de 360º, otros).

**Qué evalúan**:

1. La competencia para realizar la entrevista clínica y la exploración física (incluye calidad de la estructura de la entrevista y su conducción, actitud empática, etc)
2. La capacidad de juicio y razonamiento clínico, y para elaborar diagnósticos diferenciales, seleccionar las investigaciones a realizar (manejo diagnóstico) y planificar el manejo terapéutico
3. Comunicación con otros profesionales en condiciones habituales y en situaciones difíciles, (e.g. historia sexual, hábitos tóxicos, estados terminales, etc)
4. Profesionalismo (respeto valores personales del enfermo, del colega y el resto de profesionales sanitarios, adherencia a los principios éticos)
5. Organización y eficiencia en los encuentros clínicos (utilización del tiempo, abordaje de situaciones con incertidumbre)
6. Habilidades técnicas (cirugías mayores en el quirófano, y otros procedimientos menores realizados dentro o fuera del quirófano)
7. Manejo de la información
8. Utilización de las tecnologías
9. Gestión de recursos
10. Actitud y capacitación docente

**Responsables de la aplicación**: Los miniCEX y la Discusión basada en un Caso se pasaran entre 5 y 8 veces por año por miembros del staff y/o Residentes senior (los de 5º-6 º año); los PAMEs (idem para los OSATS y los Casos Centinela si se utilizaran en el servicio) se pasarán 1-2 veces por año por miembros del staff; las ODPP se pasarán varias veces por año por parte de enfermeras y residentes senior; el número de pruebas variará en función del año de residencia y de las tareas de aprendizaje asumidas por el residente a lo largo de su exposición al programa (ver matriz que cruza evaluaciones-competencias-año de residencia más adelante). n ANEXO 2). Para pasar los miniCEX en el primer año durante las rotaciones del primer año el tutor de residentes de Neurocirugía contactará con el tutor troncal y los miembros del staff de los servicios correspondientes.

**Escalas Globales de evaluación de las competencias nucleares**.

**Qué evalúan**:

Miden de una manera holística el nivel de competencia del residente en relación con las competencias nucleares definidas por la ACGME. Los descriptores de estas escalas ejemplifican, una vez más, el carácter multifacético de la evaluación estructurada, que en este caso se aplica “a distancia”, es decir no ya de manera inmediata tras una actuación, sino después de transcurrido un semestre o año de residencia.

Responsables de la aplicación: Estas escalas, que utilizan una escala de Likert, serán rellenadas por el tutor (asesorado si lo precisa por los miembros otros miembros del staff) 1-2 veces por año, y el resultado se discutirá con el residente que acumulará los resultados en el Libro del Residente.

**“Audits” de registros clínicos**. Pueden utilizarse también como autoevaluaciones i.e., el residente valora retrospectivamente sus propios informes elegidos al azar utilizando un formulario, o evaluaciones por el supervisor clínico.

**Qué evalúan**:

1. Calidad de la recogida de datos iniciales
2. Calidad del manejo diagnóstico y terapéutico del caso (uso de medicaciones y otros recursos terapéuticos)
3. Seguimiento intra y extrahospitalario (manejo y referencia a otros profesionales tras el alta clínica) del paciente
4. Utilización de los sistemas de codificación según la nomenclatura al uso
5. Adherencia a los principios de ética profesional
6. Uso racional de los recursos del sistema de salud (hospital de día, cuidados paliativos, etc)

**Responsables de la aplicación**: Los audits se pasaran 4-5 veces por año por miembros del staff que avisarán al residente sobre la fecha y selección de los informes a revisar

**Evaluaciones 360º.**

**Qué evalúan**:

Conductas específicas del residente y los “constructos” profesionales más genéricos o competencias nucleares (e.g. habilidades de comunicación, profesionalismo, y capacidad para el trabajo en equipo, otros)

**Responsables de la aplicación**: Estas evaluaciones se pasaran varias veces al año por miembros del staff, residentes senior, enfermeras y si se determina así, por miembros del personal administrativo y algunos pacientes. Los mimiPATs se pasarán por el staff 1-2 veces por año. Las evaluaciones serán entregadas al tutor que comunicará el resultado periódicamente al residente y recibirá el correspondiente feedback

**Autoevaluaciones.** Con estos instrumentos, que pueden incluir virtualmente todas las subcompetencias del programa, el residente se ve obligado a reflexionar y encarar la realidad de su propia competencia en los diferentes dominios competenciales. Múltiples estudios indican que las autoevaluaciones no plantean en general problemas de sesgo de sobrestimación de la propia competencia, por lo que tienen una validez reconocida y se comparan bien con las de otros observadores.

**Qué evalúan**:

El nivel de competencia que el residente cree haber alcanzado

**Responsable de la aplicación**: el propio residente

**“Milestones”**

**Qué evalúan**:

Conductas observables en relación con el desempeño del residente en diferentes momentos del trayecto formativo. Los niveles de desempeño (“performance”) observables se clasifican en cinco niveles:

Nivel 1. El residente muestra milestones propias de un “recién llegado” a la especialidad

Nivel 2. El residente avanza y demuestra milestones adicionales, pero su desempeño no llega a nievl medio

Nivel 3. El residente continua avanzando y desmuestra más milestones que incluyen ya la mayor parte de las exigidas en la residencia

Nivel 4. El residente ha avanzado y demuestra las milestones exigidas en la residencia. **Este es el nivel “diana” a alcanzar**

Nivel 5. El desempeño del residente supera los límites exigidos para acreditarle y demuestra perseguir competencia adicional similar a la exhibida por un profesional que lleva varios años en la práctica autónoma. Este nivel se alcanza de manera excepcional

Sólo se incluyen ocho tablas de “milestones” en intervencionismo endovascular considerándose como óptimo a alcanzar el nivel 3 para los residentes de neurocirugía (los niveles 4 y 5 serían aplicables para quienes dedicaran su actividad al intervencionismo de manera exclusiva)

**Responsable de la aplicación**: el supervisor clínico que marcará el nivel otorgado en las 24 milestones de la especialidad

En esta Tabla se describen “milestones” relacionadas con 4 dominios competenciales distintos del Cuidado del paciente y Conocimiento

**Tabla-Matriz que cruza los métodos de evaluación con su aplicación por año de residencia.**

| **Método de Evaluación** | **1º año** | **2º año** | **3º año** | **4º año** | **5º año** | **6º año** |
| --- | --- | --- | --- | --- | --- | --- |
| Tests teóricos (variante examen anual en 1º a 5º año **opcional**) | T* | T* | **x** | - | - | **x** |
| Observación directa de actuación con enfermo real (miniCEX, DbC, ODPP) | x | x | opción | opción | - | - |
| Observación directa de actuación con enfermo real o simulación (tipo PAME y OSATS, Casos Centinela) | - | - | Opción | x | x | - |
| Escalas globales de la competencia | x | x | x | x | x | - |
| “Audits” de registros clínicos | - | - | x | x | x | x |
| Evaluaciones 360º (incluye miniPAT) | - | x | x | x | x | x |
| Milestones | x | x | x | x | x | x |
| Autoevaluaciones (incluye autominiPAT) | x | x | x | x | x | x |
| Portafolio  Libro del Residente | Opción  x | Opción  x | Opción  x | Opción  x | Opción  x | Opción  x |

T* = Examen en las rotaciones troncales ?

**Tabla-Matriz que cruza los dominios competenciales (competencias nucleares) con los métodos de evaluación aplicador para evaluarlas**

| **Dominio competencial**  **(Competencia general)** | **Definición breve** | **Métodos de evaluación**  **(instrumentos preferidos)** | **Comentarios** |
| --- | --- | --- | --- |
| **Cuidado del paciente** | Se espera que el residente proporcione un cuidado compasivo, apropiado y efectivo para la promoción de la salud, la prevención de la enfermedad, y el tratamiento de la enfermedad en su fase inicial y estadio final | .- Observación directa; miniCEX, Dis B Cas, ODPP, PAME, OSATS, Caso Centinela  .- Escalas globales  .-Pacientes estandarizados  (de incógnito)  .- Evaluación 360º  .- Audits de registros clínicos  .- Milestones | El mejor método para evaluar la entrevista clínica es observar la interacción del residente con el paciente.  El entrenamiento del staff docente en la observación directa es esencial.  Existe evidencia de que sin esa preparación la observación resulta inexacta y poco válida |
| **Conocimiento médico** | Se espera que el residente demuestre conocimiento de las ciencias biomédicas, clínicas y sociales, y aplique el mismo al cuidado del paciente y la educación de otros | .- Tests teóricos estandarizados a nivel local/nacional  .- GEA (para medir la aplicación del conocimiento y el razonamiento clínico)  .- Discusión basada en casos o viñetas  .- Milestones | Dos aspectos básicos:  1.- Una cierta cantidad de conocimiento es imprescindible para trabajar como clínico  2.- La integración del conocimiento en el contexto o práctica clínica es imprescindible para evaluar la competencia en su aplicación (incluyendo el razonamiento clínico) |
| **Profesionalismo** | Se espera que el residente  demuestre conductas que reflejen el compromiso para asumir su propio desarrollo profesional, la ética en la practica clinica, la comprensión de la sensibilidad hacia la diversidad, y actitudes responsables hacia sus pacientes, su profesión y la sociedad | .- Observación directa (mismas pruebas incluida en Cuidado del Paciente)  .- Evaluación 360º  .- Pacientes estandarizados (de incógnito)  .- Escalas globales  .- Milestones  .- Portafolio (narrativa de reflexión)  .- | Obtener una visión completa del profesionalismo del resiente exige  entradas de múltiples fuentes: enfermeras, pacientes, familiares, colegas,  miembros del staff y otros |
| **Comunicación y relaciones interpersonales** | Se espera que el residente demuestre habilidades de comunicación y relación interpersonal que le capaciten para establecer y mantener las relaciones profesionales con los pacientes, las familias y los restantes miembros del sistema de salud | .- Observación directa (mismas pruebas incluida en Cuidado del Paciente)  .- Escalas globales  .- Pacientes estandarizados  (de incógnito)  .- Evaluación 360º  .- Audits de registros  .- Milestones | Al igual que el profesionalismo, la evaluación de este dominio competencial  exige entradas desde múltiples fuentes y perspectivas tales como  evaluaciones de enfermeras y colegas, encuesta de pacientes y otras |
| **Aprendizaje**  **Basado en la práctica y mejora** | Se espera que el residente  sea capaz de usar la evidencia científica y los métodos para investigar, evaluar y mejorar las prácticas del cuidado del paciente | .- Audits de registros clínicos  .- Casos y viñetas clínicos  .- Instrumentos de medicina basada en la evidencia  .- Autoevaluaciones  .- Proyectos de aseguramiento de la calidad(mejoría de los procesos  .- Milestones  - Portafolio | Este dominio competencial enfoca la aplicación efectiva de la medicina basada en la evidencia y la mejora de la calidad. El abordaje más simple es usar diarios clínico en los que el residente cataloga a través del tiempo cuestiones surgidas en el cuidado clínico de sus pacientes junto con copias de las fuentes de datos usadas para responderlas. Hay instrumentos para evaluar la práctica basada en la evidencia. Un buen audit clinico es el mejor método para evaluar la mejora de la calidad  Los residentes puede practicar audits por sí mismos (“self-audit) |
|  |  |  |  |
| **Práctica basada**  **en sistemas** | Se espera que el residente sea capaz de demostrar tanto una comprensión de los contextos y sistemas en los que proporcionan los cuidados de salud, como habilidad para aplicar y mejorar el cuidado de la salud | .- Audits de registros clínicos  .- Audits de registros médicos con GEA  .- Evaluación 360º  .- Proyectos de aseguramiento de la calidad (mejoría de los procesos)  .- Milestones  - Portafolio | La evaluación de este dominio competencial depende mucho del modelo de cuidado médico y el sistema educativo en el que está sumergido el residente. La evaluación por colegas, enfermeras, los coordinadores de pacientes, los trabajadores sociales y otros proporcionan importante información de la medida en la que el residente de implica en los procedimientos de cuidado (altas, trabajo social, establecimiento de las referencias). Los audits clínicos pueden mostrar si el residente facilita cuidado en consultas especiales, servicios sociales y otros que él mismo no pude proporcionar |
| **Colaboración**  **Interprofesional** | Se espera que el residente sepa reconocer las identidades y “roles” de los otros profesionales (e.g. enfermeras) y se esfuerce en integrarse en el contexto de los equipos interprofesionales para proporcionar la atención más efectiva tanto al paciente individual como a la población | .- Audits de registros clínicos  .- Evaluación 360º  .- Escalas globales  .- Autoevaluación  .- Milestones | La evaluación de este dominio competencial depende los supervisores clínicos del servicio y del juicio valorativo del otros profesionales sanitarios con los que interacciona en el trabajo diario |
| **Desarrollo profesional**  **y personal** | Atención a la conformación de la propia identidad profesional y adquisición de las cualidades necesarias para crecer tanto en el ámbito profesional como en el personal | .- Evaluación 360º  .- Escalas globales  .- Autoevaluación  .- Milestones  .- Portafolio | La evaluación de este dominio competencial depende tanto de los supervisores clínicos del servicio y del otros profesionales sanitarios con los que interacciona en el trabajo diario, como de la autoreflexión continuada y la autoevaluación |

**Relación de mínimos en la estrategia de adherencia al Programa y los métodos de evaluación**

**Compromisos del residente en relación con el conocimiento y utilización del Programa y los mínimos de evaluación:**

.- Conocer con detalle el programa y sus anexos, y más concretamente: a) La definición y límites de los dominios competenciales o competencias nucleares; b) Los listados de subcompetencias; y c) Los métodos e instrumentos de evaluación, cuya aplicación tratará siempre de facilitar por su parte

.- Evaluar la dedicación de los supervisores docentes y el funcionamiento del programa

.- Incluir todas las evaluaciones en el Libro de Residente y referirse al tutor de manera continuada

**Tabla de mínimos requeridos en la evaluación del residente y la producción académico-científica de este**. *(Con frecuenta es necesario que el propio residente solicite le sean pasadas las evaluaciones dentro de los plazos señalados en el programa, e.g. los miniCEXs y ODPPs, o los EMEs y los Audits, cuya fechas deben ser concertadas con el evaluador)*

| Exámenes teóricos de 3º (opcional para el servicio) y 6º año obligatorio |
| --- |
| Pasar 4-6 miniCEXs o Discusión basada en Caso y 4 ODPPs en el 1º y 2º año de residencia |
| Pasar las escalas globales de la competencia 2 veces por año (labor del tutor) |
| Realizar 3-4 “audits” de registros clínicos por año en los años 3º a 6º |
| Pasar 8 EMEs (evaluación por miembros del equipo) y un miniPAT por año en los años 2º a 6º (evaluación 360º) |
| Cumplimentar las escalas de autoevaluación y un autominiPAT cada año |
| “Milestones” semestrales a lo largo de toda la Residencia |
| Presentar 4 comunicaciones y publicar 2 trabajos en revistas con revisión por pares e lo largo de la residencia |

**10) EVALUACIÓN POR PARTE DEL RESIDENTE DE LA DEDICACIÓN Y CUMPLIMIENTO DE LAS TAREAS DOCENTES POR PARTE DEL TUTOR/ SUPERVISORES Y EL RESTO DEL STAFF, Y DEL PROGRAMA DOCENTE.**

Las evaluaciones propuestas en este apartado representan una **propuesta de máximos** que se aplicará en mayor o menor grado según el criterio elegido en cada servicio. El grado de confidencialidad en el manejo de la información recogida con estas evaluaciones queda a discreción del director de programa. Sin embargo, e idealmente, una parte sustancial de la misma debería ser transferida por los tutores al Comité de Programa para tratar de mejorar la docencia y el funcionamiento del Programa en los servicios y también el proceso de reacreditación docente de los mismos.

**EVALUACION DEL STAFF DOCENTE**. El residente debe evaluar al menos una vez por año (mejor dos veces/año) a cada miembro del staff del servicio de neurocirugía, y una sola vez, tras finalizar la rotación, al responsable docente de los restantes servicios por los que rota. Estas evaluaciones que serán recogidas por el tutor, se darán conocer a los interesados en las reuniones anuales de análisis de la actividad docente mantenidas por el conjunto del servicio (ver más abajo)

A continuación se presentan **formularios** para la evaluación de los miembros del staff y del tutor por parte del residente.

**Califica todos los ítems siguientes relacionados con la dedicación docente de cada uno de los miembros del staff (escala Likert de 1 a 5, siendo 1 = deficiente, y 5 = excelente):**

1) Dedicación docente del Dr. ………………………….……………. (valoración individualizada)

a) Aplicación de los métodos de instrucción ( )

b) Aplicación de los métodos de evaluación ( )

c) Calidad del feed back recibido de su parte ( )

**Comentarios:**

2) Dedicación y cumplimiento del compromiso docente del tutor:

a) Aplicación de los métodos de instrucción ( )

b) Aplicación de los métodos de evaluación ( )

c) Calidad del feed back recibido de su parte ( )

d) Control y monitorización del aprendizaje de los residentes en general ( )

e) Control y monitorización de mi aprendizaje en particular ( )

f) Se muestra accesible y presto a solucionar mis problemas ( )

**Comentarios:**

Además, el director del programa (que normalmente es el jefe de servicio) podría evaluar a los componentes del staff de acuerdo con los siguientes criterios: 1) Valoraciones otorgadas por los residentes; 2) Dedicación docente (enseñanza en quirófano y resto de contextos clínicos, participación en sesiones, conferencias, otros); 3) Servicios a la profesión (participación en organizaciones locales o nacionales); 4) Profesionalismo (su ejemplo como “role model”); 5) Actividad investigadora; 6) Desarrollo de nuevos servicios-instrumentos clínicos; 7) Becas, premios; y 8) Publicaciones. El director del programa y el tutor mantendrán una reunión anual con cada miembro del staff implicado en el programa de formación para discutir la evaluación propia y la marcha del programa.

**EVALUACION DEL FUNCIONAMIENTO DEL PROGRAMA**

Esta evaluación se puede hacer utilizando sólo la perspectiva del residente, (objetivando el incremento de sus conocimientos y habilidades y la mejora de sus conductas), o también la de sus pacientes (satisfacción de estos, o resultados clínicos), y puede incluir métodos **cualitativos** (discusiones de grupos de residentes, discusiones individuales con el residente y el staff), y **cuantitativos** (agregados de tests teóricos, miniCEXs, audits). Sin embargo, hay que recordar que las opiniones y las encuestas pasadas a quienes tienen una relación de dependencia directa con el programa (residentes, staff, administradores, etc) están expuestas a diferentes tipos de sesgos.

Este programa preconiza que el residente emita, al **menos una vez por año**, tres evaluaciones sobre el funcionamiento del programa: 1) Una, valorando la calidad de la enseñanza recibida, la calidad de las sesiones y otros aspectos del programa que remitirá al tutor (ver formulario más abajo); 2) Otra, participando en un encuentro programado con el tutor, el resto de los residentes y el director del programa; y, 3) Otra, respondiendo al tutor que les encuestará acerca de necesidades y problemas tanto personales (físicos, emocionales) como de infraestructura (ordenadores, programas, otros). Además, los residentes mantendrán un encuentro anual para evaluar el programa que tendrá dos fases; una inicial en la que participan por igual los residentes, y otra inmediatamente posterior a ésta durante la cual un residente senior (preferentemente el de 6º año) presenta los puntos a considerar en presencia del director del programa, el tutor, los restantes miembros del staff y el resto de residentes. El director del programa y el tutor estarán siempre disponibles para recibir al residente que quiera exponer un problema o sugerencia.

**Formulario-encuesta a rellenar por el residente sobre el funcionamiento del programa (**usar escala Likert de 1 a 5, siendo 1 = deficiente, y 5 = excelente):

a) Adecuación de las competencias explicitadas en el programa ( )

b) Claridad en la definición de las competencias ( )

c) Calidad y pertinencia de los métodos de instrucción ( )

d) Nivel de utilización de los anteriores ( )

e) Métodos de evaluación ( )

f) Nivel de utilización de los anteriores ( )

g) Calidad de la retroalimentación recibida ( )

h) Frecuencia de la retroalimentación recibida ( )

i ) Satisfacción global con el programa ( )

**Comentarios:**

**11) APÉNDICES**

***Apéndice 1.*** Tipos de pruebas de evaluación clínica objetiva estructurada con enfermo real (miniCEX, DbC, ODPP, PAME, Caso Centinela) o simulador (OSATS). EMEs y miniPAT. Todas van seguidas de retroalimentación inmediata y constructiva sobre la actuación del residente

**Mini-Ejercicio de Evaluación Clínica (Mini-CEX)**

| **Por favor, complete las preguntas usando una “X”. Por favor use LETRAS MAYÚSCULAS** |
| --- |

| **NOMBRE:** |  |  |  |  |  |  |  |  |  |  |  |  |  |  |  |  |  |  |  |  |  |  |  |  |  |  |
| --- | --- | --- | --- | --- | --- | --- | --- | --- | --- | --- | --- | --- | --- | --- | --- | --- | --- | --- | --- | --- | --- | --- | --- | --- | --- | --- |

| **APELLIDOS:** |  |  |  |  |  |  |  |  |  |  |  |  |  |  |  |  |  |  |  |  |  |  |  |  |  |  |  |  |  |  |  |  |  |  |  |
| --- | --- | --- | --- | --- | --- | --- | --- | --- | --- | --- | --- | --- | --- | --- | --- | --- | --- | --- | --- | --- | --- | --- | --- | --- | --- | --- | --- | --- | --- | --- | --- | --- | --- | --- | --- |

**ROTACIÓN: Lugar donde se realiza la Evaluación: Aula ⁪ Sala ⁪ Urgencias ⁪ Otro ⁪**

**Componentes de la Evaluación: Historia ⁪ Diagnóstico ⁪ Tratamiento ⁪ Explicación ⁪**

**Complejidad del caso: Baja ⁪ Mediana ⁪ Alta ⁪ Titulación del evaluador: Staff ⁭ MIR ⁭ Otro ⁭**

| **Por favor, evalúe las áreas usando la escala inferior** | Por debajo de las expectativas | | En el límite | Alcanza las expectativas | Supera las  expectativas | | NS/NC |
| --- | --- | --- | --- | --- | --- | --- | --- |
| ***Puntuación*** | **1** | **2** | **3** | **4** | **5** | **6** |  |
| Recogida de Historia | ⁭ | ⁭ | ⁭ | ⁭ | ⁭ | ⁭ | ⁭ |
| Examen Clínico | ⁭ | ⁭ | ⁭ | ⁭ | ⁭ | ⁭ | ⁭ |
| Comunicación | ⁭ | ⁭ | ⁭ | ⁭ | ⁭ | ⁭ | ⁭ |
| Juicio Clínico | **⁪** | **⁪** | **⁪** | **⁪** | **⁪** | **⁪** | **⁪** |
| Profesionalismo | ⁭ | ⁭ | ⁭ | ⁭ | ⁭ | ⁭ | ⁭ |
| Manejo Clínico global | ⁭ | ⁭ | ⁭ | ⁭ | ⁭ | ⁭ | ⁭ |

**¿Algo especialmente bueno? Sugerencias para mejorar**

**Satisfacción del Residente con el Mini-CEX :**

NingunaMuy Alta

**1 ⁭ 2 ⁭ 3 ⁭ 4 ⁭ 5 ⁭ 6 ⁭ 7 ⁭ 8 ⁭ 9 ⁭ 10 ⁭**

**Satisfacción del Evaluador con el Mini-CEX:**

NingunaMuy Alta

**1 ⁭ 2 ⁭ 3 ⁭ 4 ⁭ 5 ⁭ 6 ⁭ 7 ⁭ 8 ⁭ 9 ⁭ 10 ⁭**

**Firma del Evaluador:**

**……………………………………. FECHA: …. /…../…….**

|  |  |
| --- | --- |

**Duración de la observación (en minutos)**

|  |  |
| --- | --- |

**Duración de la Retroalimentación (minutos)**

| **Nombre del Evaluador:** |  |  |  |  |  |  |  |  |  |  |  |  |  |  |  |  |  |  |  |  |  |  |  |  |
| --- | --- | --- | --- | --- | --- | --- | --- | --- | --- | --- | --- | --- | --- | --- | --- | --- | --- | --- | --- | --- | --- | --- | --- | --- |

**Descriptores de Competencias clínicas en el miniCEX**

| **Competencia** | **Descriptor del ejecución satisfactoria de la competencia** |
| --- | --- |
| **Recogida de la historia** | Facilita el relato de la historia por el paciente, usa de manera eficaz preguntas apropiadas para obtener una información adecuada y precisa, y responde de manera apropiada a señales verbales y no verbales |
| **Examen físico** | Sigue una secuencia lógica y eficiente; examen apropiado al problema clínico; explica al paciente los pasos; tiene en cuenta el confort del paciente, y lo trata con modestia |
| **Profesionalismo y comunicación** | Muestra respeto, empatía y compasión, establece confianza; atiende los requerimientos del paciente sobre comodidad, y confidencialidad. Es consciente de sus limitaciones. Considera la perspectiva del paciente, evita el uso de jerga, es franco y honesto |
| **Juicio clínico** | Hace un diagnóstico diferencial adecuado y formula un plan de manejo apropiado y practicable. Solicita/interpreta los estudios diagnósticos apropiados, considera los riesgos y beneficios |
| **Manejo clínico global. Organización/eficiencia** | Establece prioridades; aprovecha el tiempo, sintetiza y es sucinto y eficiente. |

**Discusión Basada en un Caso (Dis b Caso)**

| **Por favor, complete las preguntas usando una “X”. Por favor use LETRAS MAYÚSCULAS** |
| --- |

| **NOMBRE:** |  |  |  |  |  |  |  |  |  |  |  |  |  |  |  |  |  |  |  |  |  |  |  |  |  |  |
| --- | --- | --- | --- | --- | --- | --- | --- | --- | --- | --- | --- | --- | --- | --- | --- | --- | --- | --- | --- | --- | --- | --- | --- | --- | --- | --- |

| **APELLIDOS:** |  |  |  |  |  |  |  |  |  |  |  |  |  |  |  |  |  |  |  |  |  |  |  |  |  |  |  |  |  |  |  |  |  |  |  |
| --- | --- | --- | --- | --- | --- | --- | --- | --- | --- | --- | --- | --- | --- | --- | --- | --- | --- | --- | --- | --- | --- | --- | --- | --- | --- | --- | --- | --- | --- | --- | --- | --- | --- | --- | --- |

**ROTACIÓN:**

**Lugar donde se realiza la Evaluación: Aula ⁪ Sala ⁪ Urgencias ⁪ Otro ⁪**

**⁭ ⁭**

**Objetivo de la Evaluación: Revisión de Hª Clínica ⁪ Valoración Clínica ⁪ Tratamiento ⁪ Profesionalismo ⁪**

**Complejidad del caso: Baja ⁪ Mediana ⁪ Alta ⁪ Titulación del evaluador: Staff ⁭ MIR ⁭ Otro ⁭**

| **Por favor, evalúe las áreas usando la escala inferior** | Por debajo de las expectativas | | En el límite | Alcanza las expectativas | Supera las  expectativas | | NS/NC |
| --- | --- | --- | --- | --- | --- | --- | --- |
|  | **1** | **2** | **3** | **4** | **5** | **6** |  |
| Revisión de Historia | ⁭ | ⁭ | ⁭ | ⁭ | ⁭ | ⁭ | ⁭ |
| Valoración Clínica | ⁭ | ⁭ | ⁭ | ⁭ | ⁭ | ⁭ | ⁭ |
| Investigación y literatura | ⁭ | ⁭ | ⁭ | ⁭ | ⁭ | ⁭ | ⁭ |
| Tratamiento | ⁭ | ⁭ | ⁭ | ⁭ | ⁭ | ⁭ | ⁭ |
| Seguimiento y Plan futuro | ⁭ | ⁭ | ⁭ | ⁭ | ⁭ | ⁭ | ⁭ |
| Profesionalismo | ⁭ | ⁭ | ⁭ | ⁭ | ⁭ | ⁭ | ⁭ |
| Juicio Clínico global | ⁭ | ⁭ | ⁭ | ⁭ | ⁭ | ⁭ | ⁭ |

**¿Algo especialmente bueno? Sugerencias para mejorar**

**Satisfacción del Residente con la Dis b Caso:**

NingunaMuy Alta

**1 ⁭ 2 ⁭ 3 ⁭ 4 ⁭ 5 ⁭ 6 ⁭ 7 ⁭ 8 ⁭ 9 ⁭ 10 ⁭**

**Satisfacción del Evaluador con la Dis b Caso:**

NingunaMuy Alta

**1 ⁭ 2 ⁭ 3 ⁭ 4 ⁭ 5 ⁭ 6 ⁭ 7 ⁭ 8 ⁭ 9 ⁭ 10 ⁭**

**Firma del Evaluador: FECHA: …. /…../…….**

|  |  |
| --- | --- |

**Duración de la observación (en minutos)**

|  |  |
| --- | --- |

**Duración de la Discusión (en minutos)**

| **Nombre del Evaluador:** |  |  |  |  |  |  |  |  |  |  |  |  |  |  |  |  |  |  |  |  |  |  |  |  |
| --- | --- | --- | --- | --- | --- | --- | --- | --- | --- | --- | --- | --- | --- | --- | --- | --- | --- | --- | --- | --- | --- | --- | --- | --- |

**Observación Directa de Procedimientos Prácticos (ODPP)**

| **Complete las casillas usando una “X”. Por favor use letras mayúsculas** |
| --- |

| **NOMBRE:** |  |  | |  | |  | |  | |  | |  | |  | |  | |  | |  | |  | |  | |  | |  | |  | |  | |  | |  | |  | |  | |  | |  | |  | |  | |  | |
| --- | --- | --- | --- | --- | --- | --- | --- | --- | --- | --- | --- | --- | --- | --- | --- | --- | --- | --- | --- | --- | --- | --- | --- | --- | --- | --- | --- | --- | --- | --- | --- | --- | --- | --- | --- | --- | --- | --- | --- | --- | --- | --- | --- | --- | --- | --- | --- | --- | --- | --- | --- |
| **APELLIDOS:** | | |  | |  | |  | |  | |  | |  | |  | |  | |  | |  | |  | |  | |  | |  | |  | |  | |  | |  | |  | |  | |  | |  | |  | |  | |  | |  |  |  |  |  |  |  |  |  |  |

**Lugar de la Observación: Sala⁪ Quirófano ⁪ Urgencias⁪**

**Procedimiento: ………………………………………………………**

**Titulación del evaluador: Profesor ⁭ MIR ⁭ Enfermera ⁭ Otro ⁭**

| **Por favor, evalúe las áreas usando la escala inferior** | Por debajo de las expectativas | | En el límite | Alcanza las expectativas | Supera las  expectativas | | N/A* |
| --- | --- | --- | --- | --- | --- | --- | --- |
|  | **1** | **2** | **3** | **4** | **5** | **6** |  |
| Demuestra entender las indicaciones, anatomía relevante y técnica del procedimiento | ⁭ | ⁭ | ⁭ | ⁭ | ⁭ | ⁭ | ⁭ |
| Demuestra una adecuada preparación pre-procedimiento | ⁭ | ⁭ | ⁭ | ⁭ | ⁭ | ⁭ | ⁭ |
| Habilidad Técnica | ⁭ | ⁭ | ⁭ | ⁭ | ⁭ | ⁭ | ⁭ |
| Técnica de Asepsia | ⁭ | ⁭ | ⁭ | ⁭ | ⁭ | ⁭ | ⁭ |
| Tratamiento post-procedimiento | ⁭ | ⁭ | ⁭ | ⁭ | ⁭ | ⁭ | ⁭ |
| Comunicación | ⁭ | ⁭ | ⁭ | ⁭ | ⁭ | ⁭ | ⁭ |
| Trato al paciente | ⁭ | ⁭ | ⁭ | ⁭ | ⁭ | ⁭ | ⁭ |
| Habilidad global para realizar el procedimiento | ⁭ | ⁭ | ⁭ | ⁭ | ⁭ | ⁭ | ⁭ |

**N/A= No Aplicable**

**¿Algo especialmente bueno? Sugerencias para mejorar**

**Satisfacción del Residente con la ODPP :**

NingunaMuy Alta

**1 ⁭ 2 ⁭ 3 ⁭ 4 ⁭ 5 ⁭ 6 ⁭ 7 ⁭ 8 ⁭ 9 ⁭ 10 ⁭**

**Satisfacción del Evaluador con el ODPP:**

NingunaMuy Alta

**1 ⁭ 2 ⁭ 3 ⁭ 4 ⁭ 5 ⁭ 6 ⁭ 7 ⁭ 8 ⁭ 9 ⁭ 10 ⁭**

**Firma del Evaluador: FECHA: …. /…../…….**

|  |  |
| --- | --- |

**Duración de la observación (en minutos)**

|  |  |
| --- | --- |

**Duración de la Discusión (en minutos)**

| **Nombre del Evaluador:** |  |  |  |  |  |  |  |  |  |  |  |  |  |  |  |  |  |  |  |  |  |  |  |  |
| --- | --- | --- | --- | --- | --- | --- | --- | --- | --- | --- | --- | --- | --- | --- | --- | --- | --- | --- | --- | --- | --- | --- | --- | --- |
|  |

**PAMEs, OSATSs y Caso Centinela**

Ya se apuntó que otro recurso evaluador comprehensivo para medir la competencia global del residente senior de cirugía (años 4º a 6º) es el uso separado o combinado de las técnicas PAME (Patient Assessment and Management Examination) y OSATS (Objective Structured Assessment of Technical Skills) que miden de manera fiable y válida la competencia para recoger una historia, realizar la exploración física, solicitar e interpretar exploraciones complementarias, delimitar y discutir planes de manejo con el paciente, obtener consentimientos informados, discutir el manejo operatorio y las potenciales complicaciones con el paciente y demostrar pericia técnica en una muestra de procedimientos quirúrgicos. Como ocurre con otras técnicas similares de evaluación de la competencia es importante entrenar a los examinadores en su aplicación.

**PAME**. En esta prueba se recurre a un **enfermo estandarizado** que simula una enfermedad elegida entre las patologías básicas o más relevantes de la especialidad. Se suele pasar una o dos veces por año y su duración es de una mañana o una tarde. Incluye entre 6-8 estaciones (o “settings”), y la introducción a cada estación incluye un grupo de informes de referencia y resultados de investigaciones que deberían haber sido completadas antes de referir al paciente al servicio (en nuestro caso) de neurocirugía. En la primera estación se pide al candidato que recoja la historia clínica y haga la exploración física del enfermo (8 minutos) y que solicite las exploraciones complementarias pertinentes al caso. A continuación se proporcionan los resultados de los tests de laboratorio, pruebas de imagen, etc que haya podido solicitar, y se pide que los interprete y proporcione un diagnóstico diferencial (5 minutos). A continuación el paciente retorna para una visita de seguimiento en la que se espera que el candidato discuta el diagnóstico con el paciente y concierte con él/ella un plan de manejo (10 minutos). El paciente es adiestrado para formular preguntas acerca de las opciones terapéuticas y sus posibles complicaciones. Finalmente, el paciente sale de la consulta y el observador plantea entre 3 y 5 preguntas predeterminadas dirigidas sobre todo a estimar la capacidad del candidato para solucionar complicaciones intraoperatorias en relación con el caso.

Cada una de las estaciones es puntuada en una escala de Likert de 1 a 5 por un miembro del staff (1 = inadecuado, 3 = adecuado para la práctica independiente y 5 = excepcional, excede las expectativas). Además, el examinador rellena cinco escalas globales tras el primer encuentro relativas a las competencias siguientes: recogida de la historia, exploración física, conocimiento, habilidades de comunicación, y juicio o impresión global (esta estructura es similar a la del miniCEX). A éstas se añaden dos escalas globales más sobre investigaciones solicitadas e interpretación de estas. Tras el segundo encuentro el examinador rellena otras cuatro escalas globales relacionadas con: manejo, conocimientos, comunicación y juicio global. El componente final de examen oral va seguido de la cumplimentación de otras tres escalas relacionadas con: conocimiento, juicio clínico e impresión global. Por tanto, cada PAME conlleva 14 evaluaciones de la competencia con escalas globales.

**OSATS.** Es un examen de la habilidad técnica del residente de cirugía. La estructura es similar a la de un ECOE (examen clínico objetivo estructurado) de manera que el residente desarrolla una labor concreta en estaciones sucesivas. Se manejan simulaciones de porciones de intervenciones quirúrgicas. En cirugía general se usan estaciones de 15 minutos de duración en las que las labores en cirugía general son: cierre de una herida quirúrgica, inserción de un tubo en T, anastomosis de asa intestinal, anastomosis vascular, reparación de una hernia, etc. El examinador usa también aquí escalas globales referidas a siete dimensiones cada una relacionada con algún aspecto de la técnica quirúrgica. Cada dimensión se gradúa con una escala de Likert de 5 puntos con los descriptores extremos y central explicitados. La puntuación final del residente en cada estación viene dada por la media de las siete dimensiones. Los items de las escalas globales se construyen de modo que sean operación-independientes para poder usar la misma escala global en todas las estaciones. En Canadá, el PAME y el OSATS se pasan en un solo día en ruedas de mañana y tarde en las que unos residentes circulan por el PAME, mientras que los otros lo hacen por el OSATS, y viceversa. Los OSATSs requieren disponer de un laboratorio de anatomía quirúrgica, experimental o de habilidades y de los correspondientes simuladores. No se conocen OSATS diseñados específicamente para neurocirugía.

En algunos países anglosajones se recurre a la **observación de la habilidad quirúrgica con enfermo real.** Así, se utiliza el llamado **CASO CENTINELA** (1-2 observaciones por año), en el que el residente es observado durante una operación convencional por el supervisor que pasa un formulario estructurado sobre su actuación. El ejercicio se acuerda previamente con el residente y se practica de manera que no proporcione stress innecesario.

**Evaluación por Miembros del Equipo (EME), y el miniPAT para la evaluación 360º.**

**Formulario para Evaluación por Miembros del Equipo (EME)**

Nombre del residente:___________________________________ Puesto actual:________________________

Fecha___________________________

Por favor use los recuadros de este formulario para comentar la buena conducta y para describir cualquier disfunción de ésta

que le cause preocupación. Dé ejemplos concretos. Este formulario será remitido al tutor de residentes, quien podría preguntarle

privadamente sobre cualquier problema o duda con respecto a su informe. El residente recibirá **retroalimentación** de forma privada,

pero usted no será identificado sin antes haber recabado su opinión y discutido el problema con usted.

| **ACTITUD y/o**  **COMPORTAMIENTO** | **SIN**  **PROBLEMA** | **ALGUNOS**  **PROBLEMAS** | **PROBLEMAS**  **SERIOS** | Comentarios: ¿Algo especialmente bueno?  *Si no puede dar una opinión por falta de conocimiento, por favor dígalo aquí.* ***Debe comentar específicamente cualquier problema en el comportamiento.*** *Debe reflejar el comportamiento a lo largo de un periodo – no sólo un incidente individual.* |
| --- | --- | --- | --- | --- |
| **Manteniendo la confianza / Relación profesional con los pacientes**  Escucha. Es educado y cuidadoso. Muestra respeto por las opiniones de los pacientes, su privacidad, dignidad y confidencialidad. No tiene prejuicios. |  |  |  |  |
| **Habilidades de comunicación verbal**  Da información comprensible. Habla buen castellano y explica las cosas a un nivel adecuado para el enfermo. |  |  |  |  |
| **Trabajo en equipo / Trabajando con colegas**  Respeta el papel de los otros y trabaja constructivamente en el equipo. Delega de forma efectiva y se comunica bien. No tiene prejuicios, da apoyo y es justo. |  |  |  |  |
| **Accesibilidad**  Accesible. Toma su propia responsabilidad. Delega de forma apropiada. No rehúye el deber. Responde a las llamadas y prepara sus ausencias para que estén cubiertas |  |  |  |  |
| **Nombre del evaluador:** |  | **Puesto:** |  | **Firma: Fecha:** |

Por favor remita el formulario relleno en un sobre cerrado al tutor de residentes.

**
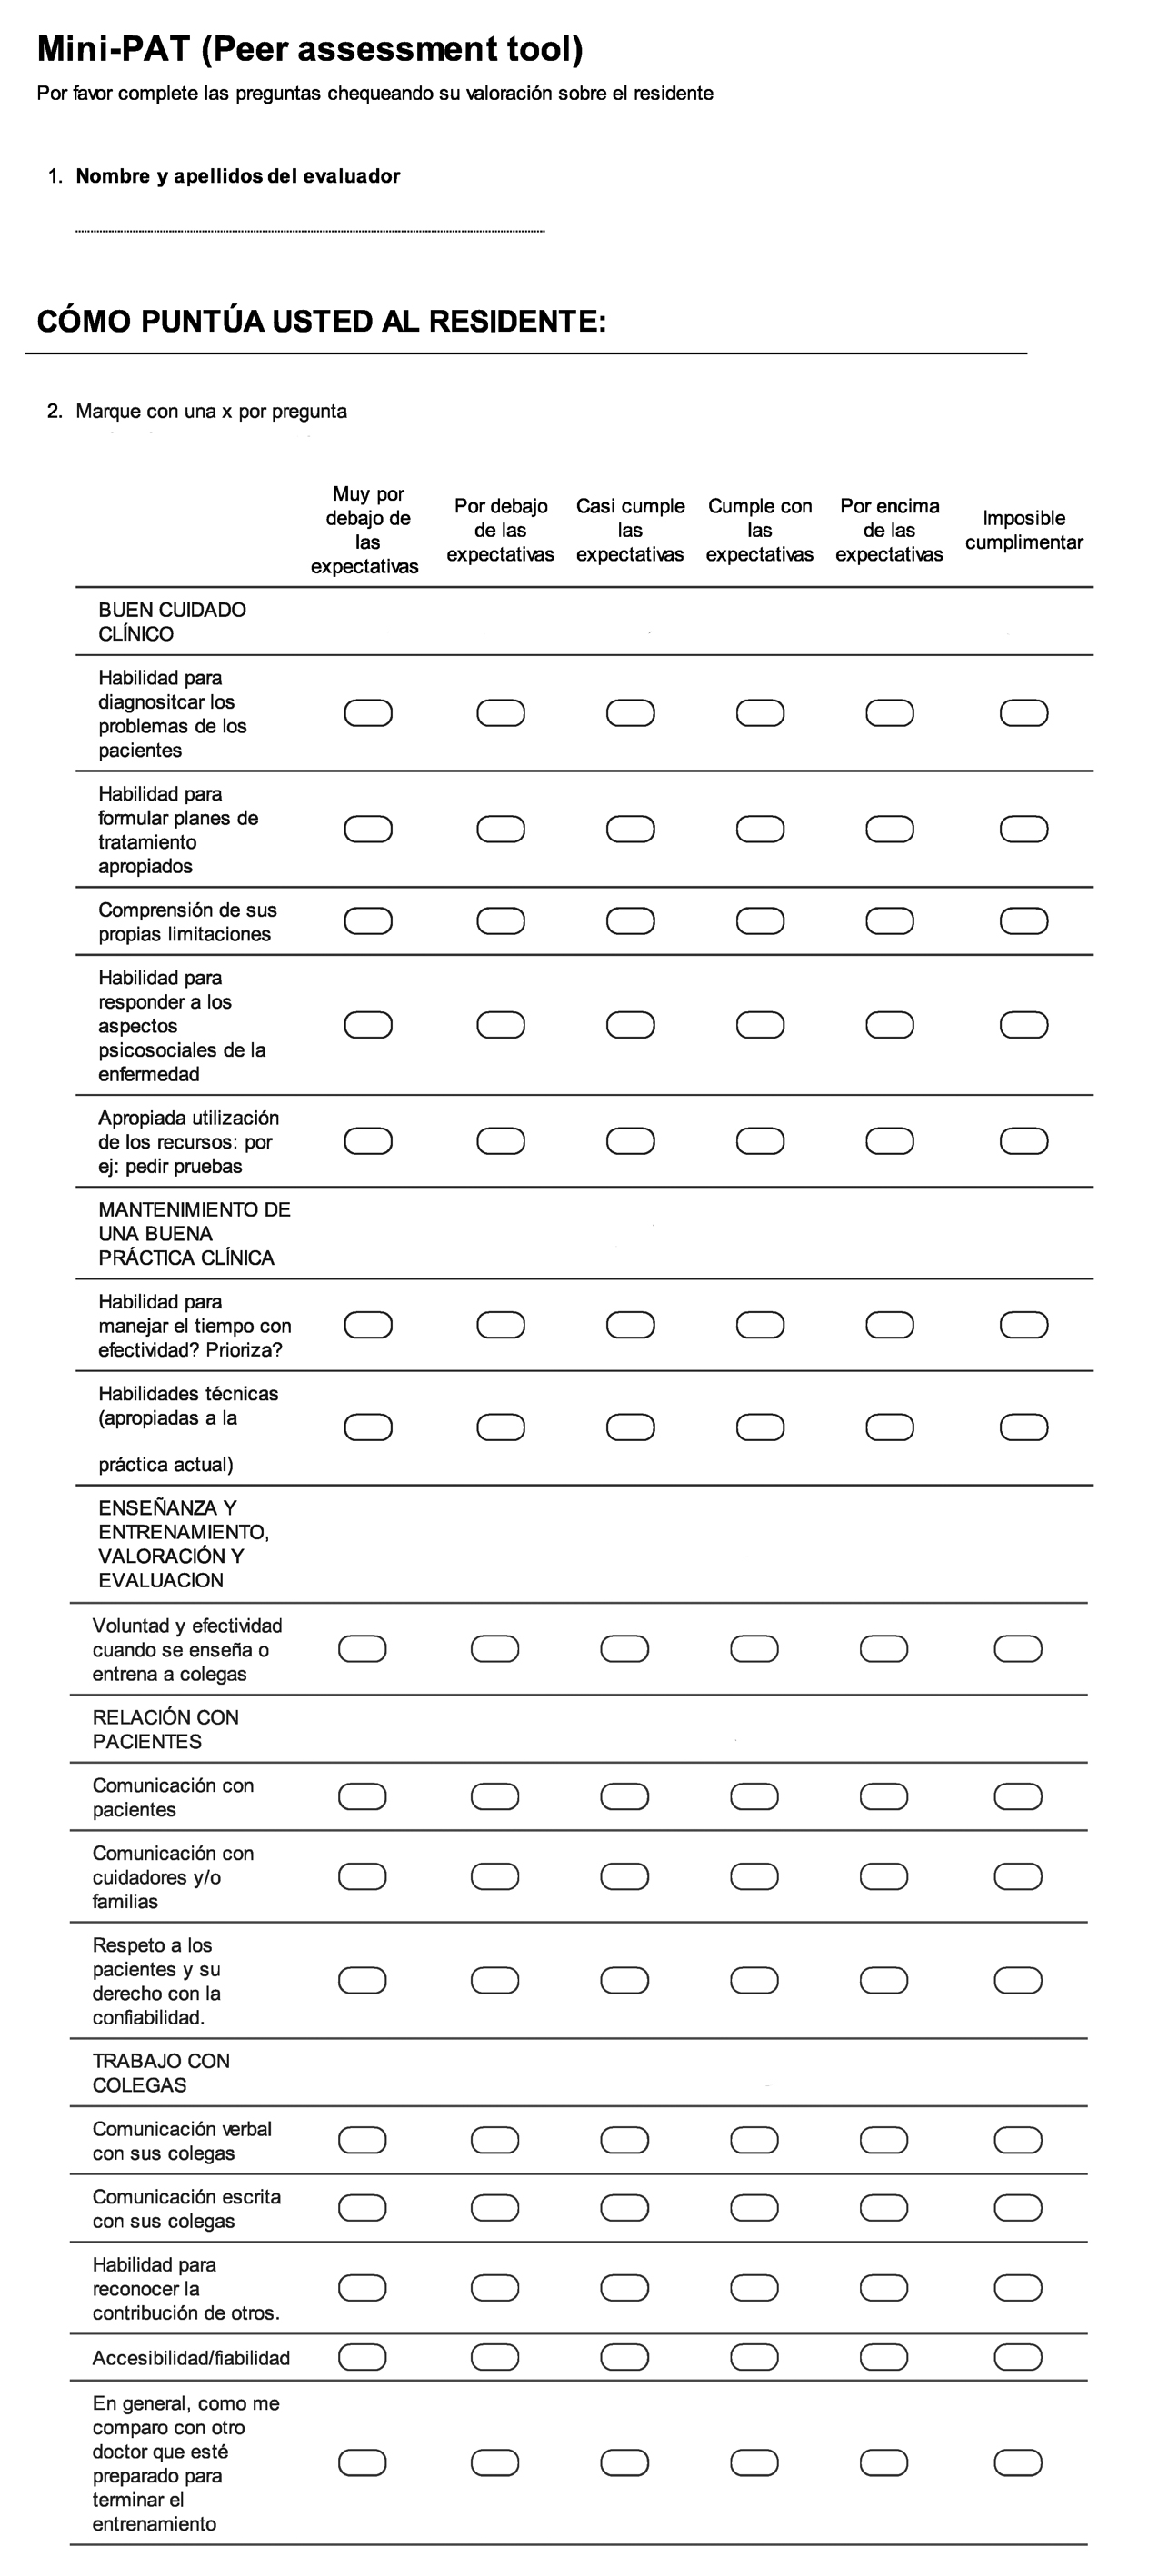
**

**Instrumentos de Autoevaluación (Escalas globales, y autominiPAT)**

Formulario para Autoevaluación de competencias del tronco quirúrgico-cuidado del enfermo crítico (a rellenar por el Residente de **Primer y Segundo Años**)

| **GESTIÓN Y ORGANIZACIÓN DEL ÁREA QUIRÚRGICA. SEGURIDAD DEL PACIENTE, HIGIENE Y GESTIÓN DE RIESGOS** | **Puntúate de 1 a 5** |
| --- | --- |
| Conocer la estructura, organización, gestión y funcionamiento del área quirúrgica |  |
| Conocer las indicaciones principales de cirugía mayor ambulatoria |  |
| Utilizar los protocolos quirúrgicos de seguridad del paciente y las listas de comprobación del área quirúrgica |  |
| Aplicar los protocolos de higiene hospitalaria y las normas de asepsia quirúrgica |  |
| **TÉCNICAS Y PROCEDIMIENTOS EN CIRUGÍA** |  |
| Realizar la valoración general del riesgo quirúrgico |  |
| Valorar el tratamiento prequirúrgico de pacientes anticoagulados, antiagregados y diabéticos |  |
| Conocer las bases legales y de la obtención del consentimiento informado en cirugía |  |
| Conocer las alteraciones hidroelectrolíticas y del equilibrio acido-base y las bases de la fluidoterapia |  |
| Realizar el balance hidroelectrolítico en el paciente quirúrgico |  |
| Valorar el estado nutricional del paciente quirúrgico |  |
| Conocer la respuesta metabólica al ayuno y a la agresión quirúrgica |  |
| Conocer las bases del soporte nutricional y las vías de aporte |  |
| Conocer los fundamentos de la anestesia tópica y los bloqueos nerviosos |  |
| Indicar y realizar técnicas de anestesia local |  |
| Conocer el abordaje farmacológico y el tratamiento básico del dolor postoperatorio |  |
| Valorar y conocer el manejo de la pérdida hemática quirúrgica y las coagulopatías asociadas |  |
| Conocer las técnicas de ahorro de sangre |  |
| Conocer y saber utilizar los principales agentes hemostáticos |  |
| Conocer e indicar el uso de hemoderivados |  |
| Realizar la profilaxis de la enfermedad tromboembólica y abordar su manejo inicial |  |
| Conocer y aplicar los tratamientos anticoagulantes y antiagregantes más habituales |  |
| Canular una vía venosa periférica y central y controlar radiológicamente una vía central |  |
| Obtener una muestra para gasometría arterial |  |
| **MATERIALES Y TÉCNICAS QUIRÚRGICAS. BIOLOGÍA Y CICATRIZACIÓN DE LAS HERIDAS QUIRÚRGICAS** |  |
| Conocer el instrumental y los materiales quirúrgicos más comunes |  |
| Conocer el equipamiento, las técnicas básicas y las principales indicaciones de la cirugía endoscópica y mínimamente invasiva |  |
| Conocer las bases y el instrumental básico en microcirugía |  |
| Aplicar las normas básicas de asepsia usadas en el quirófano: lavado de manos, colocación de bata-guantes, preparación de un campo quirúrgico |  |
| Conocer los mecanismos de cicatrización normal y patológica de los tejidos |  |
| Conocer los tipos más habituales de incisiones quirúrgicas y suturas |  |
| Conocer y aplicar el cuidado de las heridas quirúrgicas y traumáticas más comunes |  |
| Desbridar y drenar abscesos |  |
| Aplicar los cuidados de los drenajes de la herida quirúrgica |  |
| **MANEJO DEL POLITRAUMATIZADO** |  |
| Aplicar el ABC de la reanimación del paciente politraumatizado |  |
| Valorar el paciente con traumatismo craneoencefálico (Coma traumático: Escala Coma Glasgow) |  |
| Valorar el paciente con traumatismo raquimedular (identificación de la lesión medular aguda) |  |
| Valorar los traumatismos abiertos y cerrados de cara y boca, cuello, torax, abdomen, pelvis y extremidades |  |
| Identificar y valorar las lesiones traumáticas vasculares y de nervio periférico |  |
| Preparar un paciente politraumatizado para traslado interhospitalario |  |
| **INFECCIÓN EN CIRUGÍA** |  |
| Conocer las bases de laprevención de la infección de la herida quirúrgica y las infecciones postoperatorias a distancia |  |
| Manejar la antibioterapia profiláctica y terapéutica en cirugía |  |
| **QUEMADURAS** |  |
| Valorar la extensión y profundidad de las quemaduras y aplicar el cuidado inicial |  |
| Manejar inicialmente el aporte de fluidos en los quemados |  |
| **CIRUGÍA ONCOLÓGICA** |  |
| Conocer los mecanismos de la carcinogénesis y la invasión y metastatización tumoral |  |
| Indicar e interpretar marcadores tumorales |  |
| **CIRUGÍA DE TRASPLANTE DE ÓRGANOS Y TEJIDOS** |  |
| Conocer las indicaciones actuales del trasplante de órganos y tejidos |  |
| Conocer los criterios de donación de órganos |  |
| Conocer los mecanismos y las características de rechazo y los mecanismos de inmunosupresión |  |
| Conocer los métodos y criterios diagnósticos de muerte cerebral |  |
| **AREAS ESPECIFICAS** |  |
| **Cirugía Digestiva** |  |
| Realizar la anamnesis y exploración clínica completa del abdomen |  |
| Valorar y orientar el manejo inicial de un abdomen agudo |  |
| Diagnosticar las hernias y eventraciones de la pared abdominal |  |
| Haber asistido o ayudado a la realización de una laparotomía y una laparoscopia |  |
| Colocar una sonda nasogástrica |  |
| Realizar un tacto rectal |  |
| **Cirugía Torácica** |  |
| Realizar la exploración clínica completa del torax |  |
| Indicar e interpretar los resultados de una gasometría arterial y una espirometría |  |
| Reconocer y orientar el manejo inicial de un neumotorax a tensión |  |
| Haber visto o realizar una toracocentesis y saber valorar la composición del líquido pleural |  |
| Conocer el funcionamiento y cuidar de un drenaje torácico |  |
| **Cirugía Vascular** |  |
| Realizar la evaluación básica del paciente con isquemia aguda y crónica de las extremidades |  |
| Diagnosticar y orientar el manejo de la trombosis venosa profunda |  |
| Orientar el diagnóstico y manejo inicial de los aneurismas aórticos y periféricos |  |
| Haber asistido a un cateterismo cardiaco u otro procedimiento endovascular diagnóstico- terapéutico |  |
| **Cirugía Maxilofacial-ORL** |  |
| Realizar una exploración básica de la de cabeza, cuello y región maxilo-facial |  |
| Iniciar el manejo de una epistaxis y del sangrado oral de origen espontáneo o postraumático (taponamiento nasal anterior) |  |
| Abordar el manejo urgente de los traumatismos faciales |  |
| **Endocrino y Mama** |  |
| Realizar la exploración clínica del tiroides |  |
| Realizar una exploración mamaria completa |  |
| **Urología** |  |
| Orientar el diagnóstico y manejo inicial de la hematuria |  |
| Diagnosticar y tratar las infecciones del tracto urinario |  |
| Evaluar y manejar la retención aguda de orina |  |
| Diagnosticar y orientar el manejo inicial de las masas escrotales |  |
| Interpretar una muestra de orina para análisis o cultivo y manejar una tira básica de orina |  |
| Practicar un sondaje vesical masculino y femenino |  |
| Explorar la próstata por tacto rectal |  |
| **Aparato Locomotor** |  |
| Realizar la exploración física completa del aparato locomotor (partes blandas, articulaciones de los miembros y estática y dinámica de la columna vertebral) |  |
| Realizar una artrocentesis y valorar la analítica del liquido sinovial |  |
| Colocar un vendaje funcional y un yeso |  |
| Reducir algunos tipos de luxación y alinear ciertos tipos de fractura, incluida la inmovilización de la columna vertebral |  |
| **ATENCION AL PACIENTE CRITICO Y PATOLOGÍA URGENTE** |  |
| Priorizar en caso de demandas de asistencia coincidente (triage) |  |
| Conocer los principios básicos de actuación ante una catástrofe o accidente con víctimas múltiples |  |
| Realizar las maniobras de resucitación cardiopulmonar básica y avanzada, tanto en el niño como en el adulto |  |
| Adquirir experiencia inicial en el cuidado crítico del paciente crítico, (incluyendo el politraumatizado y el neuroquirúrgico) |  |
| Conocer los principios básicos y la clínica práctica de la neuroanestesia |  |
| Orientar y tratar el shock hipovolémico |  |
| Diagnosticar y tratar la insuficiencia respiratoria aguda |  |
| Diagnosticar y orientar el manejo de arritmias que comporten riesgo vital |  |
| Colocar y manejar el desfibrilador externo semiautomático (DESA) |  |
| Dominar las técnicas de monitorización incluyendo el uso de vías centrales e intravenosas, presión venosa central, monitorización invasiva de la presión arterial, catéteres de Swan-Ganz y el monitor-desfibrilador convencional |  |

**Escala Global de Autoevaluación a rellenar por el residente de Primer Año en relación con su nivel de adquisición de las competencias genéricas y específicas u operacionales.**

*(El residente debe considerar el mapa de competencias reflejado en el Programa para poder realizar la puntuación).*

| **Dominio Competencial** | **Puntúate de 1 a 5** |
| --- | --- |
| Adquisición de conocimientos |  |
| Adquisición de competencias genéricas |  |
| Adquisición de competencias en comunicación y relaciones interpersonales |  |

**Escala Global de Autoevaluación a rellenar por el residente de 2º a 6º Año en relación con su nivel de adquisición de las competencias genéricas y específicas u operacionales.**

*(El residente debe considerar el mapa de competencias reflejado en el Programa para poder realizar la puntuación).*

| **Dominio Competencial** | **Puntúate de 1 a 5** |
| --- | --- |
| Adquisición de conocimientos |  |
| Cuidado del paciente |  |
| Comunicación y relaciones interpersonales |  |
| Profesionalismo |  |
| Aprendizaje basado en la práctica |  |
| Sistemas de salud |  |
| Colaboración interprofesional |  |
| Desarrollo profesional y personal |  |

**
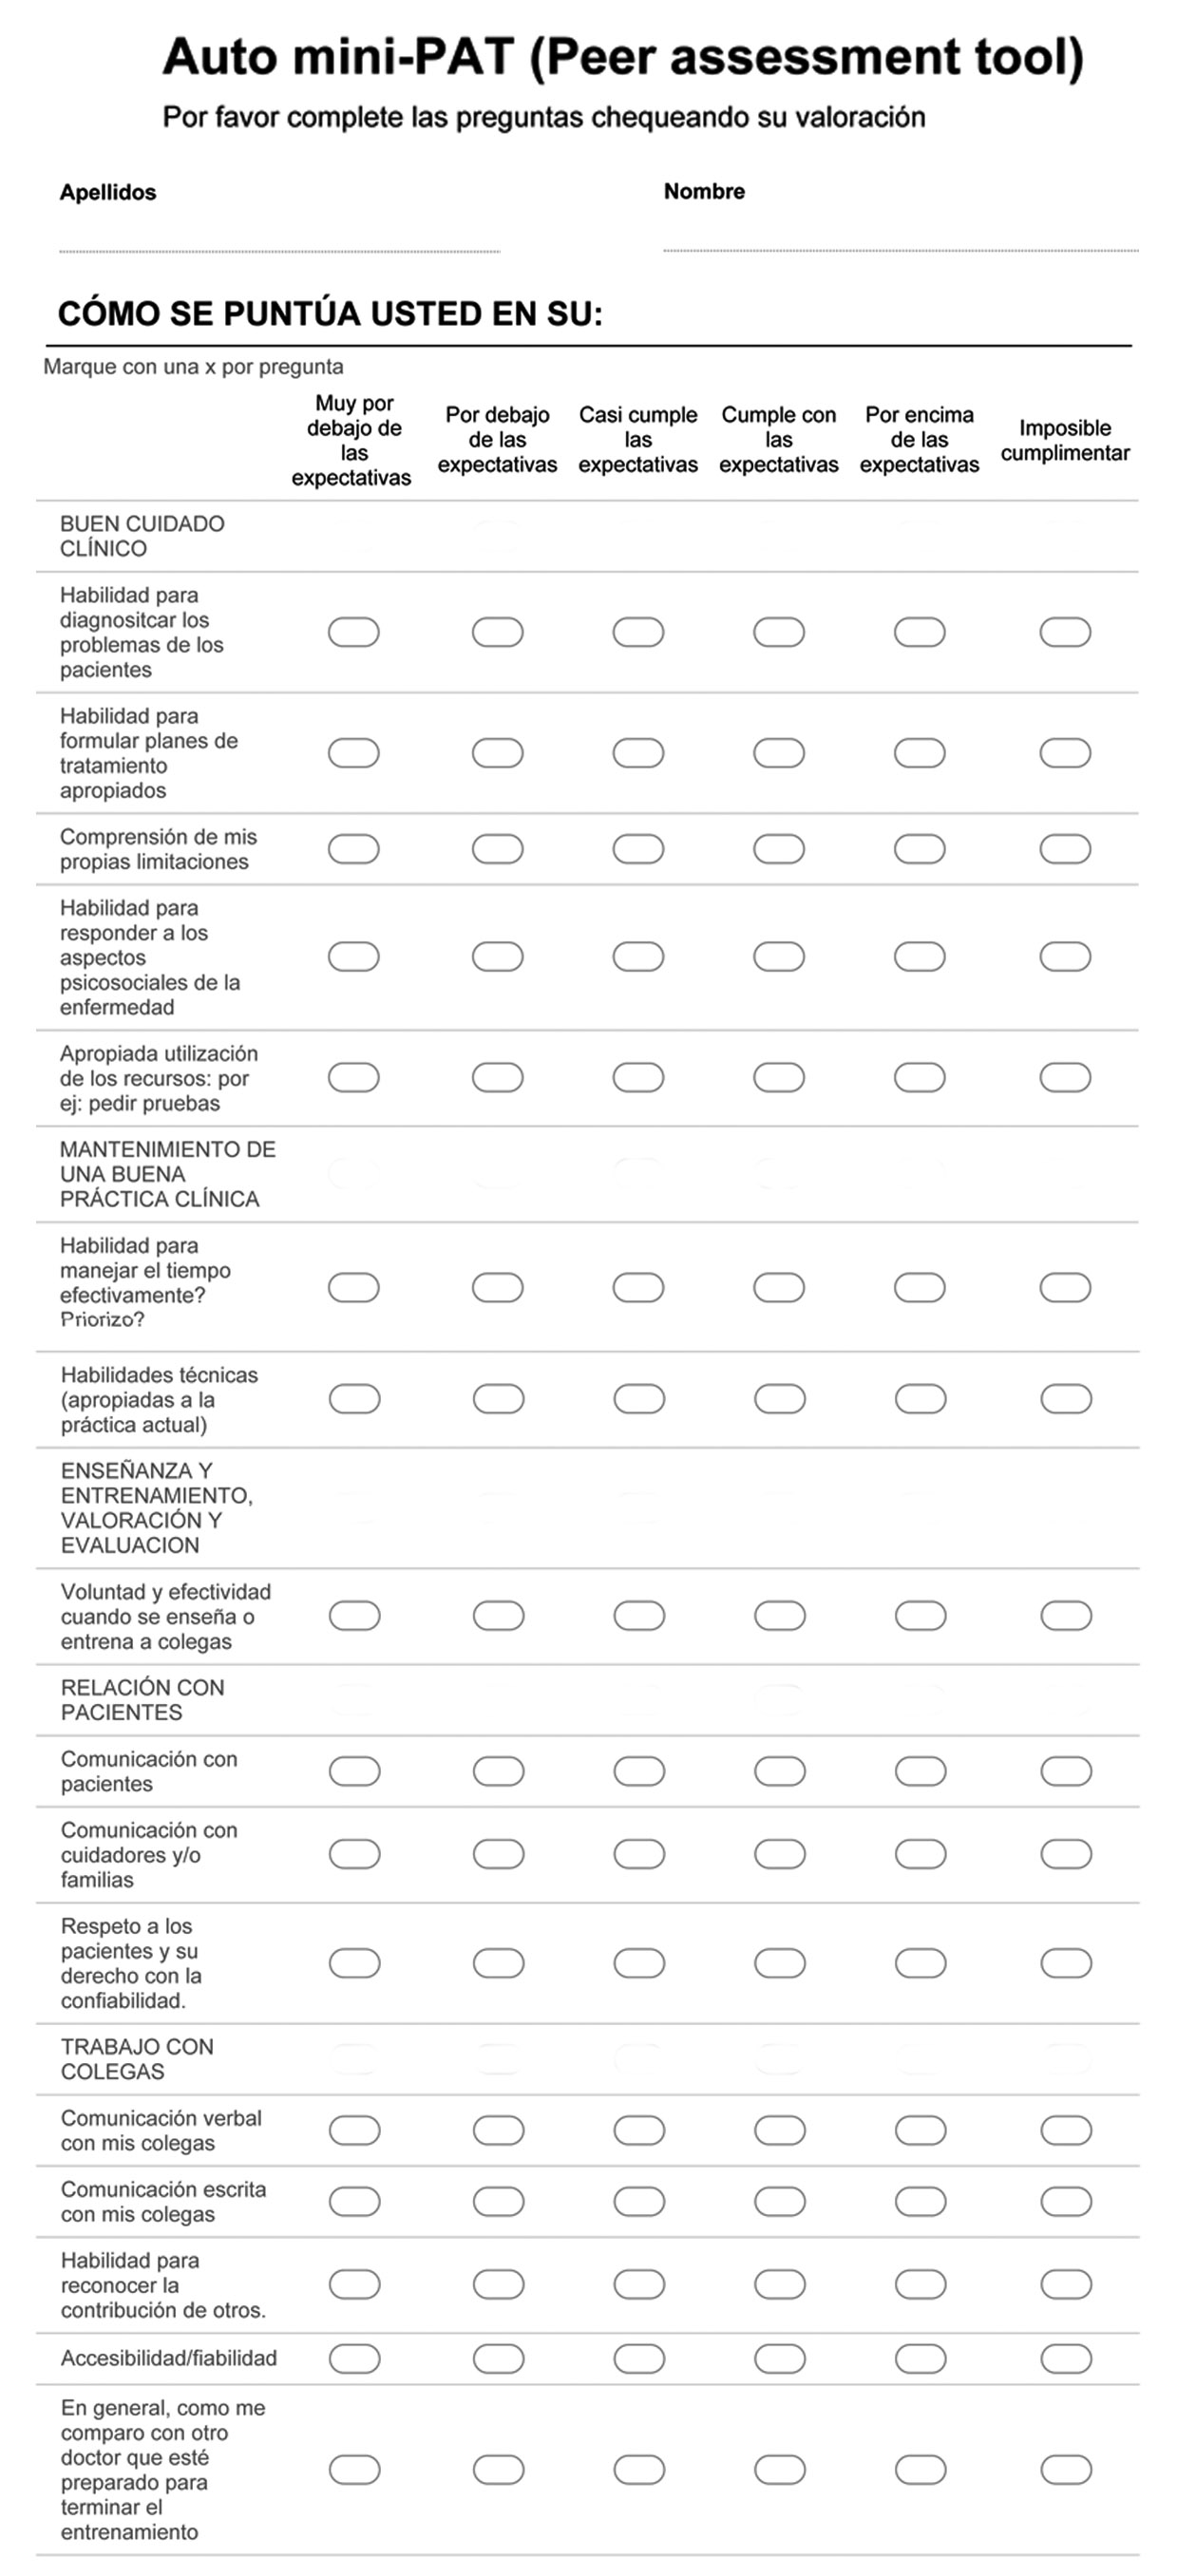
**

***Apéndice 2.* Escalas globales para la evaluación periódica de las competencias nucleares por parte del supervisor docente**

**Escala Global A para evaluación de la competencia**

**Nombre del residente** _______________________ **Rotación**: **___________**

**Nombre del evaluador__________________________ Periodo de Rotación**:

Para evaluar la actuación del residente use el estándar del nivel de conocimientos, habilidades y aptitudes que se esperan de un residente que ha alcanzado un nivel de entrenamiento claramente satisfactorio. Para cada componente que requiere atención, o que es puntuado con 4 o menos, por favor emita comentarios específicos y recomendaciones en la parte posterior del formulario, y al hacerlo sea tan específico como pueda, incluyendo descripciones de incidentes críticos y/o una actuación fuera de serie. Adjetivos globales o comentarios, tales como buen residente, no suministran una retroalimentación con significado o adecuada al residente.

1. Cuidado del paciente:

Insatisfactorio Satisfactorio Superior

1 2 3 4 5 6 7 8 9

Incompletas e inexactas entrevistas médicas, exploraciones y revisión de otros datos; Ejecución incompetente de procedimientos esenciales; incapaz de analizar datos clínicos o considerar las preferencias del paciente cuando se consideran decisiones médicas.

☐ El nivel de actuación requiere atención

Entrevistas médicas, exploraciones y revisión de otros datos así como habilidades en procedimientos, superiores, ajustadas a la realidad y comprensivas; Siempre realiza las decisiones clínicas y las decisiones terapéuticas basadas en la evidencia disponible, con juicio adecuado y siguiendo las preferencias del paciente

☐ Insuficiente contacto para juzgar

2. **Conocimientos médicos**

Conocimiento excepcional de las ciencias básicas y clínicas; desarrollo de conocimiento lleno de recursos; comprensión amplia de relaciones complejas o de los mecanismos de la enfermedad.

Insatisfactorio Satisfactorio Superior

1 2 3 4 5 6 7 8 9

☐ Insuficiente contacto para juzgar

☐ El nivel de actuación requiere atención

Conocimientos limitados sobre ciencias básicas y clínicas; mínimo interés en el aprendizaje; no entiende relaciones complejas o los mecanismos de la enfermedad

1. Aprendizaje basado en la práctica

Insatisfactorio Satisfactorio Superior

1 2 3 4 5 6 7 8 9

Falla al realizar autoevaluación; no tiene iniciativa de introspección; se resiste o ignora la retroalimentación; falla en usar las tecnologías de la información, en mejorar el cuidado del paciente, o buscar la mejoría propia.

Constantemente evoluciona en su propia actuación, incorpora la retroalimentación para mejorar sus actividades; usa eficientemente la tecnología para manejar información para el cuidado del paciente y el mejor desarrollo personal.

☐ El nivel de actuación requiere atención

☐ Insuficiente contacto para juzgar

1. Habilidades de comunicación e interpersonales

☐ El nivel de actuación requiere atención

Establece una relación terapéutica efectiva con pacientes y familias; demuestra excelente capacidad de construir relaciones a través de habilidades narrativas, no verbales o de atención; excelente capacidad de consejo o educación a los pacientes, familias y colegas; constantemente involucrado en relaciones interpersonales.

No establece ni siquiera una mínima relación terapéutica efectiva con pacientes y familias; no demuestra habilidad para construir relaciones a través de habilidades narrativas, no verbales o de atención; no provee consejo o educación a los pacientes, familias o colegas.

Insatisfactorio Satisfactorio Superior

1 2 3 4 5 6 7 8 9

☐ Insuficiente contacto para juzgar

5. Profesionalismo

Ausencia de respeto, compasión, integridad, honestidad; desprecia la necesidad de autoevaluación; no tiene capacidad para aceptar los errores; no considera las necesidades de los pacientes, familias, colegas; no muestra una conducta responsable

Siempre demuestra respeto, compasión, integridad, honestidad; enseña/demuestra el modelo de comportamiento responsable; total compromiso para la autoevaluación; acepta los errores; siempre considera las necesidades de pacientes, familias o colegas.

Insatisfactorio Satisfactorio Superior

1 2 3 4 5 6 7 8 9

☐ Insuficiente contacto para juzgar

☐ El nivel de actuación requiere atención

6. Aprendizaje basado en sistemas

☐ El nivel de actuación requiere atención

☐ Insuficiente contacto para juzgar

Incapaz de acceder/movilizar recursos externos; se resiste activamente a mejorar los sistemas de cuidados; no usa de forma sistematica aproximaciones para reducir el error y mejorar el cuidado de los pacientes.

Insatisfactorio Satisfactorio Superior

1 2 3 4 5 6 7 8 9

Utiliza de forma eficiente los recursos externos; usa de forma eficiente aproximaciones sistemáticas para reducir el error y mejorar el cuidado de los pacientes; asiste de forma entusiasta en mejorar y desarrollar el servicio.

**Resultado global de la competencia durante la rotación**

Insatisfactorio Satisfactorio Superior

1 2 3 4 5 6 7 8 9

**Comentarios y observaciones**: ________________________________________________________________________________________________________________________________________________________________________________________________________________________________________________________________________________________________________________________________________________________________________________________________________________________________________________________________________________________________________________________________________________________________________________________________________________________________________________________________________________________________________________________________________________________________________________________________________________________________________________________________________________________________________________________________________________________________________________________________________________________________________________________________________________________________________________________________________________________________________________________________________________________________________________________________________________________________________________________________________________________________________________________________________________________________________________________________________________________________________________________________________________________________________________________________________________________________________________________________________________________________________________________________________________________________________________________________________________________________________________________________________________________________

Firma del residente:__________________________________ Firma del evaluador_________________________________

**Escala Global B para evaluación de la competencia**

**Nombre del residente**:________________________________________________ **Fechas:** Desde___________ Hasta____________ Lugar:__________________

Para cada área de evaluación por favor indique el nivel adecuado de habilidad. Las cualidades deben ser acumulativas al mismo tiempo que la puntuación se incrementa; por ejemplo: Una puntuación sobresaliente para el examen físico asume que los hallazgos mayores son identificados de una forma organizada y enfocada ,y que los hallazgos sutiles son enumerados. Indique el nivel en el que el estudiante es consistente.

| ***Excelente*** | ***Por encima de la media*** | ***Aceptable*** | ***Necesita mejorar*** | ***Inaceptable*** |
| --- | --- | --- | --- | --- |
| **RECOGIDA DE INFORMACIÓN CLÍNICA** | | | | |
| **Historia inicial/habilidades de entrevista** Si no se ha observado por favor indique aquí ☐ | | | | |
| ☐ Lleno de recursos, eficiente, aprecia sutilezas, prepara para el manejo | ☐ Preciso, detallado, apropiado al ambiente (planta o consulta); dirigido/selectivo | ☐ Obtiene la historia básica, identifica problemas. Recoge de forma adecuada los datos | ☐ Inconsistente, incompleto o no dirigido. Recogida de datos inconsistente | ☐ No fiable. Inexacto, omisiones mayores, inapropiado. |
| **Habilidades de examen físico** Si no se ha observado por favor indique aquí ☐ | | | | |
| ☐ Demuestra hallazgos sutiles | ☐ Organizado, dirigido, relevante | ☐ Identifica los hallazgos mayores | ☐ Incompleto o insensible al confort del paciente | ☐ No fiable, incapaz de recoger hallazgos, fallos mayores |
| **REGISTRO DE DATOS** | | | | |
| **Historias o exploraciones escritas** Si no se ha observado por favor indique aquí ☐ | | | | |
| ☐ Conciso, refleja una comprensión profunda del proceso de la enfermedad y situación del paciente | ☐ Documenta la información más relevante, dirigida, comprensiva, la descripción implica interpretación | ☐ Ajustada a la realidad, completa, en tiempo. Alcanza el papel de reportero | ☐ A veces tarde; ausencia de detalle, resultados de laboratorio o lista de problemas incompleto. Fallos en el registro | ☐ Datos no correctos u omisiones graves. No fiable. |
| **Notas clínicas/ notas de evolución** Si no se ha observado por favor indique aquí ☐ | | | | |
| ☐ Analítico en la evaluación y el plan. | ☐ Preciso, conciso, organizado. | ☐ Identifica los problemas que van sucediendo, documenta los planes | ☐ Necesita organización, omite datos importantes | ☐ No datos principales o datos no correctos. |
| **Presentaciones orales** Si no se ha observado por favor indique aquí ☐ | | | | |
| ☐ Ajustadas a la situación (tipo de visita o sesión); énfasis y selección de los hechos; enseña a otros los puntos clave | ☐ Presentación fluida; dirigida; buen contacto visual; selección de los hechos implica interpretación | ☐ Mantiene el formato, incluye toda la información básica; mínimo uso de notas | ☐ Omisiones graves, incluye frecuentemente datos irrelevantes. | ☐ Constantemente mal preparado, no conoce los problemas de los pacientes, describe información no cierta |
| **CONOCIMIENTOS** | | | | |
| **En general** Si no se ha observado por favor indique aquí ☐ | | | | |
| ☐ Entiende las intervenciones terapéuticas, base de conocimiento amplia. | ☐ Comprensión amplia de la aproximación diagnóstica, puede llevar a interpretar. | ☐ Demuestra conocimientos básicos de patofisiología | ☐ Comprensión marginal de cuestiones básicas, lo pasa mal interpretando datos para otros | ☐ Deficiencias graves en conocimientos básicos |
| **En relación a pacientes propios** Si no se ha observado por favor indique aquí ☐ | | | | |
| ☐ Conocimientos amplios de los libros de texto, capacidad para buscar en la literatura y educacional para otros. | ☐ Diagnósticos diferenciales amplios; puede discutir problemas menores; suficiente como para sugerir el manejo. | ☐ Conoce los diagnósticos diferenciales básicos de problemas activos en pacientes propios; tiene perspectiva de ir ganando en conocimiento | ☐ Comprensión inconsistente, insuficiente para interpretar consistentemente los pacientes propios. | ☐ Ausencia de conocimiento para comprender los problemas de los propios pacientes; rara vez suficiente para interpretar. |
| **INTERPRETACIÓN DE LOS DATOS** | | | | |
| **Análisis** Si no se ha observado por favor indique aquí ☐ | | | | |
| ☐ Comprende asuntos complejos, interrelaciona los problemas de los pacientes | ☐ Ofrece de forma consistente interpretación de los datos. | ☐ Construye listas de problemas, aplica diagnósticos diferenciales razonables | ☐ Reporta datos frecuentemente sin análisis; los listados de problemas necesitan de mejora | ☐ No puede interpretar datos básicos; los listados de problemas son inexactos o no actualizados |
| **Juicio clínico/ Manejo** Si no se ha observado por favor indique aquí ☐ | | | | |
| ☐ Aproximación profunda al manejo de problemas | ☐ Las decisiones diagnósticas son consistentemente razonables | ☐ Cuidado del paciente adecuado teniendo en cuenta las limitaciones propias | ☐ Priorización inconsistente de las cuestiones clínicas | ☐ Juicio pobre, las acciones perjudican al paciente |
| **HABILIDADES TERAPÉUTICAS O DE MANEJO DE PACIENTES** | | | | |
| **Actividades relacionadas con el cuidado de pacientes** Si no se ha observado por favor indique aquí ☐ | | | | |
| ☐ Funciona a un nivel senior, negocia con los pacientes, coordina el equipo de cuidados | ☐ Eficiente, efectivo, toma la iniciativa de forma frecuente en el seguimiento (ambulante o en planta) | ☐ Monitoriza los problemas activos, mantiene los registros de los pacientes, cumple con los deberes para con los pacientes | ☐ Necesita que le conminen a completar las tareas; el seguimiento no es consistente. | ☐ No desea realizar las actividades relacionadas con el cuidado de pacientes; no fiable. |
| **Procedimiento**s Si no se ha observado por favor indique aquí ☐ | | | | |
| ☐ Inusualmente experto y habilidoso | ☐ Cuidadoso, fiable, compasionado | ☐ Muestra una habilidad razonable a la hora de prepararse y en la realización de procedimientos | ☐ Temeroso de realizar incluso los procedimientos más sencillos | ☐ No se observa mejora incluso con entrenamiento o supervisión estrecha; insensible |
| **ACTITUDES PROFESIONALES** | | | | |
| **Fiabilidad/ Compromiso** Si no se ha observado por favor indique aquí ☐ | | | | |
| ☐ Acepta la propiedad personal de su educación y el cuidado de los pacientes | ☐ Buscando responsabilidad como manager; se considera asi mismo como participante activo en el cuidado de pacientes | ☐ Cumple con responsabilidad, acepta la propiedad de los papeles esenciales en el cuidado | ☐ En muchas ocasiones no preparado, inconsistente, no comunica de forma adecuada | ☐ Ausencias sin explicación, no fiable. No realiza ninguna promesa de cumplir con la obligación. |
| **Respuesta a la retroalimentación del instructor** Si no se ha observado por favor indique aquí ☐ | | | | |
| ☐ La autoevaluación continuada lleva a un crecimiento mayor; reflexiones profundas. | ☐ Busca y mejora de forma consistente con la retroalimentación; reflexiona sobre si mismo. | ☐ Generalmente mejora con la retroalimentación | ☐ Inconsistente, no mejora de forma sostenida | ☐ Ausencia de mejoría, defensivo/argumentativo, evita la responsabilidad. |
| **Autoaprendizaje (conocimientos y habilidades)** Si no se ha observado por favor indique aquí ☐ | | | | |
| ☐ Sobresaliente iniciativa, educa a otros | ☐ Marca sus propios objetivos; lee, prepara con adelanto siempre que sea posible | ☐ Lee apropiadamente y acepta la responsabilidad de su propia educación | ☐ Necesita que le ordenen, no es seguro que gane en conocimientos | ☐ No quiere, ausencia de introspección. Seguro que no gana en conocimientos |
| **COMPORTAMIENTO PROFESIONAL** | | | | |
| **Interacción con el paciente** Si no se ha observado por favor indique aquí ☐ | | | | |
| ☐ Proveedor favorito; visto como el responsable del cuidado por los pacientes | ☐ Gana confianza, su trabajo es evidente para los pacientes y el equipo médico | ☐ Empático, respetuoso, gana confianza | ☐ Ocasionalmente insensible e inatento | ☐ Evita el contacto personal, falto de tacto, maleducado, no respetuoso |
| **Respuesta al estrés** Si no se ha observado por favor indique aquí ☐ | | | | |
| ☐ Comportamiento sobresaliente, soluciones constructivas | ☐ Flexible, apoyo. | ☐ Ajuste apropiado | ☐ Inflexible, pierde la compostura fácilmente | ☐ Comportamiento inadecuado ante el estrés |
| **Relaciones de trabajo** Si no se ha observado por favor indique aquí ☐ | | | | |
| ☐ Establece un tono de respeto mutuo y dignidad | ☐ Buena relación con los miembros del servicio | ☐ Cooperativo, productivo miembro del equipo | ☐ Falta de consideración a los demás | ☐ Antagonico al grupo o disruptor |

COMENTARIO: Se necesitan comentarios escritos también. ¿Cuál es el próximo paso para este residente ?

Grado recomendado para el residente_____________ Ha discutido este formulario con el residente_________

Nombre:_______________________ Firma_________________________ Fecha__________________________________

Nuestro sistema está basado en criterios de actuación más que en porcentajes. Por favor use estos grados para describir el nivel actual de competencia del residente

APROBADO: Actuación satisfactoria. Obtiene y describe información básica de forma completa ajustada y fiable; comienza a interpretar; las cualidades profesionales son sólidas.

APROBADO ALTO: Claramente demuestra más que la competencia típica en la mayor parte de las áreas de evaluación. Procede de forma consistente a interpretar datos; buen fundamento de trabajo; participante activo en el cuidado médico. Preparación consistente para el trabajo clínico. Capacidad futura de ser un experto.

EXCELEBTE: Nivel excelente en la mayor parte de las áreas de evaluación. Nivel de cuidado del paciente del último año de residencia, sugiriendo de forma activa opciones de manejo; nivel general de conocimiento excelente, y excelente conocimiento (amplio y profundo) de los pacientes propios. Cualidades fuertes de liderazgo y excelencia en las relaciones interpersonales; capaz de liderar con pacientes, familias y profesionales en la toma de soluciones. Capacidad futura de mejorar en la experiencia y trabajo de forma evidente y excepcional.

APROBADO BAJO: En general actuación marginal; actúa de forma aceptable en algunas áreas, pero claramente necesita mejorar en otras. Ha mostrado progreso evidente y podría actuar aceptablemente como médico con experiencia adicional en la especialidad teniendo que repetir el año.

FALLA/SUSPENSO: En general actuación inadecuada o inaceptable en cualquier área mayor de evaluación. Poca mejoría incluso con guía. Esta nota obligaría a repetir la residencia/rotación

***Apéndice 3.* El portafolio docente**

El portafolio docente se puede definir como una colección de trabajos y materiales generados y aportados por el residente, junto con evaluaciones diversas, que, reunidos durante un tiempo, reflejan el desarrollo de su aprendizaje y son objeto de anotaciones reflexivas acerca de cómo aprendió y sobre lo aprendido en términos de resultados o niveles competenciales alcanzados. Este instrumento evaluador y de soporte del aprendizaje recibe cada vez más atención como el método más robusto de evaluación de la capacitación y el desarrollo profesional en una era en la que el foco de la enseñanza-aprendizaje se desplaza a la competencia clínica; y es que la evaluación de las competencias genéricas (profesionalismo, pensamiento crítico, etc) resulta más difícil que la de las específicas, y requiere información descriptiva y cualitativa como la que proporcionan los componentes “narrativos” del portafolio. La reflexión en la práctica clínica, la autoevaluación y la interacción constante con un supervisor o tutor, con el cual el residente planifica una serie de encuentros para verificar la adecuación del recorrido docente y el alcance parcial de los objetivos, son las marcas distintivas entre el log-book (simple colección de actividades y datos representada por el Libro del Residente) y el verdadero portafolio.

En este programa se recomienda el uso del portafolio docente, si bien queda a criterio de cada servicio recurrir a este instrumento o tan sólo al Libro de Residente (log book). De recurrir al portafolio, el tutor de residentes, el director del programa (jefe de servicio) y los residentes acordarán la estructura y contenidos del mismo, definiendo las estrategias de los encuentros tutor-residente y los métodos de retroalimentación a emplear.
