# Supplementary material
Source: Elsevier journal article supplement (https://www.sciencedirect.com/science/article/pii/S1130147316000233)
Supplement: mmc5 [file S1130147316000233:mmc5.docx]

**ANEXO 3 del PROGRAMA DE NEUROCIRUGÍA.** “MILESTONES DE NEUROCIRUGÍA”. Traducidas de Selden NR et al (J Grad Med Educ, 2013)

Tabla 1

| **Tumor cerebral – Conocimiento médico** | | | | |
| --- | --- | --- | --- | --- |
| **Nivel 1** | **Nivel 2** | **Nivel 3** | **Nivel 4** | **Nivel 5** |
| - Correlaciona los déficits neurológicos con la localización de las lesiones. - Correlaciona la localización radiológica del tumor con la anatomía del sistema ventricular, los nervios craneales o la anatomía vascular. - Describe la fisiopatología de las lesiones masa y la hidrocefalia obstructiva. - Describe el tratamiento médico sintomático para las lesiones masa neoplásicas (por ejemplo esteroides, drenaje ventricular) | - Describe el uso de la radiación y la quimioterapia para los tumores cerebrales y de la médula espinal. - Enumera las indicaciones de biopsia o resección de los tumores cerebrales o espinales. - Categoriza los tumores cerebrales o espinales por la edad, histologia y apariencia radiológica. - Describe el diagnóstico diferencial no neoplásico de lesiones masa. - Describe la historia natural de tumores intrínsecos cerebrales. | - Describe la genética de los tumores cerebrales y los marcadores genéticos que tienen relación con el pronóstico. - Describe el uso de la neurorradiología avanzada en la evaluación y planificación quirúrgica (p.ej la resonancia magnética, tractografía, imagen funcional o espectroscopia). - Describe el uso de la neuronavegación y la imagen intraoperatoria de los tumores cerebrales. - Describe el papel de los abordajes de base de cráneo en la resección tumoral, la atención de complicaciones y su manejo. | - Describe los resultados esperados tras la cirugía de los tumores cerebrales y medulares. - Describe el papel de la radiocirugía en el tratamiento de los tumores cerebrales. - Describe el papel de los cuidados paliativos en el cuidado de los pacientes con tumores cerebrales. - Describe la aproximación personalizada de la medicina en el tratamiento de los tumores cerebrales. | - Contribuye a la literatura sometida a revisión por pares de los tumores cerebrales y espinales. - Participa en la investigación sobre tumores cerebrales y ensayos clínicos. |
|  | | | | |
| Comentarios: No ha rotado todavía | | | | |

Tabla 2

| **Tumor cerebral – Cuidado del paciente** | | | | |
| --- | --- | --- | --- | --- |
| **Nivel 1** | **Nivel 2** | **Nivel 3** | **Nivel 4** | **Nivel 5** |
| - Realiza una historia y examen físico en pacientes con tumores cerebrales o de la médula espinal. - Provee cuidados perioperatorios de pacientes con tumores cerebrales o de la médula espinal. - Inicia la aproximación diagnóstica de pacientes con tumores. - Reconoce los signos e inicia el manejo del deterioro neurológico. | - Explica el riesgo y beneficio de procedimientos neuroquirúrgicos para tumores cerebrales y de la médula espinal. - Interpreta los estudios diagnósticos. - Ayuda en procedimientos rutinarios (por ejemplo, la resección de gliomas o metástasis en áreas no elocuentes, biopsias estereotácticas). - Reconoce e incia el manejo de complicaciones (por ejemplo hematoma, infección, crisis o hidrocefalia). | - Formula un plan de manejo y tratamiento de pacientes con tumores cerebrales, de base de cráneo o de la médula espinal. - Realiza de forma independiente procedimientos rutinarios. - Realiza procedimientos complejos con ayuda (p.ej: resección de un glioma en área elocuente, tumor ventricular o de fosa posterior). - Maneja eventos intraoperatorios inesperados (por ejemplo sangrado de seno venoso, edema cerebral). - Trata complicaciones con ayuda. | - Formula de manera independiente un plan de tratamiento para pacientes con comorbilidades y otros factores que lo complican (por ejemplo enfermedades sistémicas, radiación, quimioterapia). - Realiza procedimientos complejos de manera independiente - Adapta planes de tratamiento estandar a circunstancias especiales (por ejemplo cirugías previas, anticipando morbilidad neurológica) - Trata complicaciones de forma independiente. | - Revisa de forma sistemática los resultados del tratamiento de tumores cerebrales y medulares. - Participa en el incremento de la calidad del tratamiento de tumores cerebrales y medulares. - Participa o lidera un grupo multidisciplinar de tumores. |
|  | | | | |
| Comentarios: No ha rotado todavía | | | | |

Tabla 3

| **Cuidados Críticos – Conocimiento médico** | | | | |
| --- | --- | --- | --- | --- |
| **Nivel 1** | **Nivel 2** | **Nivel 3** | **Nivel 4** | **Nivel 5** |
| - Describe la fisiología de la presión intracraneal y la presión de flujo cerebral - Describe fisiología respiratoria y ventilatoria y su efecto sobre SNC. - Describe la fisiopatología del infarto de miocardio y la insuficiencia cardiaca congestiva. - Describe la fisiología de la coagulación y hemostasia. - Describe los principios de soporte nutricional. - Conoce indicaciones de monitorización PIC y evacuación hematoma. - Describe la autorregulación cerebral. | - Describe la fisiopatología y el tratamiento médico de la hipertensión intracraneal y el edema cerebral. - Describe los técnicas de ventilación mecánica y el tratamiento del shunt pulmonar y espacio muerto. - Describe la profilaxis de la trombosis venosa profunda. - Describe la fisiopatología y el tratamiento de la cetoacidosis diabética. - Describe la etiología e imagen de le hemorragia intracraneal y daño parenquimatoso. | - Describe las indicaciones para monitorización electroencefalográfica. - Discute las indicaciones y riesgos de la intubación/ ventilación. - Describe la fisiopatología y el tratamiento de la enfermedad crítica sistémica (ej: hipertensión, coagulopatía, alteración electrolítica, deprivación alcohólica). - Conoce las indicaciones y complicaciones de la craniectomía descompresiva, drenaje de LCR y coma barbitúrico en el TCE. | - Describe la evolución final tras TCE y el impacto de la hipertensión intracraneal y la cirugía. - Entiende las bases del DOPPLER trascraneal y su papel en la monitorización. - Discute los riesgos del drenaje de LCR, terapia hiperosmolar e hiperventilación. - Describe métodos para evaluar la perfusión tisular y el volumen intravascular. | - Contribuye a la literatura sometida a revisión por pares en neurointensivismo - Describe monitorización cerebral avanzada (ej: oxigenación cerebral tisular, saturación yugular de oxígeno, microdialisis). - Describe la imagen avanzada en el TCE (ej: perfusión metabolismo cerebral) - Describe las indicaciones y riesgos para varios métodos de hemodiálisis y oxigenación extracorpórea (ECMO) |
|  | | | | |
| Comentarios: No ha rotado todavía | | | | |

Tabla 4

| **Cuidados Críticos – Cuidado del paciente** | | | | |
| --- | --- | --- | --- | --- |
| **Nivel 1** | **Nivel 2** | **Nivel 3** | **Nivel 4** | **Nivel 5** |
| - Realizar historia y examen físico en pacientes críticos. - Pautar postura, analgesia, sedación, bloqueo neuromuscular, líquidos i.v y nutrición en pacientes críticos - Diagnosticar y planear tratamiento para enfermedades pulmonares comunes - Usar ECG para diagnosticar arritmias; iniciar monitorización hemodinámica. - Realizar una exploración en muerte cerebral | - Explicar riesgos y beneficios del soporte ventilatorio. - Interpretar estudios diagnósticos (ej:Rx tórax, tomografía computerizada (TC), ECO cardiaco). - Manejar la hipertensión intracraneal (ej: agentes hiperosmolares, drenajes LCR). - Manejar vía aérea y realizar intubación endotraqueal. - Introducir catéteres venosos centrales y arteriales. - Diagnosticar y manejar shock espinal o hipovolémico. | - Elabora un plan de manejo y tratamiento para un paciente comatoso. - Maneja hipertensión intracraneal refractaria (ej: presión arterial, presión de perfusión cerebral). - Obtiene test confirmatorios y realiza un adecuado diagnóstico de la muerte cerebral. - Inicia tratamiento de neumonía o infección sistémica | - Es capaz, sin ayuda, de formular un plan de tratamiento para enfermos complejos (ej: fallo autorregulación cerebral, fallo multiorgánico, daño cerebral no recuperable). - Diagnostica e inicia el manejo de un síndrome de distres respiratorio. - Maneja vía aérea compleja urgente. - Diagnostica y maneja fístula de LCR. - Inicia tratamiento de alteraciones del ritmo cardiaco. | - Realiza un seguimiento sistemático de pacientes neurocríticos - Participa en la mejoría de calidad de la Unidad de Intensivos. |
|  | | | | |
| Comentarios: No ha rotado todavía | | | | |

Tabla 5

| **Traumatismo craneoencefálico (TCE) – Cuidado del paciente** | | | | |
| --- | --- | --- | --- | --- |
| **Nivel 1** | **Nivel 2** | **Nivel 3** | **Nivel 4** | **Nivel 5** |
| - Realizar historia y examen físico en pacientes comatosa y asigna una puntuación en la escala de coma de Glasgow (GCS). - Evalua a un paciente politraumatizado y asigna una puntuación de severidad (Injury Severity Score). - Aplica el tratamiento inicial a un paciente politraumatizado. - Detecta una exploración neurológica alterada. - Aplica los cuidados perioperatorios de rutina al paciente con TCE. - Coloca un monitor de presión intracraneal (PIC) y un drenaje ventricular. | - Explica riesgos y beneficios de los procedimientos neuroquirúrgicos en el TCE. - Interpreta estudios diagnósticos para el paciente con TCE. - Organiza al equipo quirúrgico de urgencia, y coloca al paciente para la craneotomía con las precauciones cervicales. - Ayuda en procedimientos rutinarios (ej: trépano, craneotomía por hematoma o herida penetrante). - Reconoce e inicia el proceso diagnóstico de las complicaciones (ej: hematoma, crisis, sepsis, alteraciones de monitorización). | - Elabora un plan de tratamiento interdisciplinario para un paciente politraumatizado. - Selecciona los pacientes que deben ser intervenidos. - Realiza de forma independiente procedimientos rutinarios. - Realiza procedimientos complejos con ayuda (ej: repara una lesión vascular, una fístula de LCR o un hematoma de fosa posterior) - Maneja las complicaciones con ayuda. - Maneja el drenaje ventricular externo. | - Prioriza el manejo de las lesiones de una paciente politraumatizado. - Realiza procedimientos complejos de forma independiente. - Maneja eventos intraoperatorios (ej: edema cerebral, hemorragia, embolismo aéreo). - Adapta el tratamiento estándar a circunstancias especiales (ej: comorbilidades médicas, coagulopatía). - Maneja de forma independiente complicaciones del SNC. | - Revisa de forma sistemática los resultados del tratamiento para el TCE. - Participa en la mejora de la calidad del cuidado del TCE. - Participa en el desarrollo de una plan de cribado en un escenario de desastre. - Reconstruye lesiones craneofaciales complejas.   . |
|  | | | | |
| Comentarios: No ha rotado todavía | | | | |

Tabla 6

| **Tratamiento quirúrgico de la Epilepsia y los Trastornos del Movimiento - Conocimiento médico** | | | | |
| --- | --- | --- | --- | --- |
| **Nivel 1** | **Nivel 2** | **Nivel 3** | **Nivel 4** | **Nivel 5** |
| - Describe la embriología y la anatomía funcional de los ganglios basales, tálamo y córtex - Describe los hallazgos físicos y realiza el diagnóstico diferencial de los trastornos del movimiento más comunes - Describe la semiología y la fisiopatología de los tipos más frecuentes de crisis epilépticas - Describe el tratamiento médico del estatus epiléptico | - Conoce y describe el tratamiento médico de la epilepsia y de los trastornos del movimiento - Enumera las indicaciones quirúrgicas para pacientes con epilepsia o trastornos del movimiento - Describe hallazgos de imagen en epilepsias frecuentes y trastornos del movimiento (p.ej resonancia magnética, tomografía por emisión de positrones y SPECT) - Describe los principios de la estereotaxia centrada mediante arco - Describe las causas de error de localización en estereotaxia (p.ej. desplazamiento del cerebro, error humano) | - Describe la fisiopatología, incluyendo la genética, de los tipos más frecuentes de trastornos del movimiento - Describe la fisiopatología y la anatomía patológica de las epilepsias más comunes - Identifica en la Imagen de Resonancia Magnética (IRM) las estructuras objetivo para la cirugía de los trastornos del movimiento - Describe cómo se usa el EEG de superficie e invasivo en la localización de los focos de crisis - Identifica los patrones más comunes de anormalidades en el EEG | - Describe los resultados esperados tras la cirugía de los trastornos del movimiento - Describe las respuestas a la estimulación eléctrica adyacente a las estructuras nerviosas diana de estimulación cerebral profunda y en regiones de córtex elocuente - Describe las indicaciones de las intervenciones neuromoduladoras o lesionales - Describe el papel de la radiocirugía para las lesiones funcionales - Describe las indicaciones de la estimulación del nervio vago (ENV), callosotomía y hemisferectomía | - Contribuye a la revisión por pares de la literatura sobre la epilepsia y los trastornos del movimiento |
|  | | | | |
| Comentarios: No ha rotado todavía | | | | |

Tabla 7

| **Tratamiento quirúrgico de la Epilepsia y los Trastornos del Movimiento - Cuidado del Paciente** | | | | |
| --- | --- | --- | --- | --- |
| **Nivel 1** | **Nivel 2** | **Nivel 3** | **Nivel 4** | **Nivel 5** |
| - Realiza la historia clínica y la exploración física en pacientes con epilepsia o trastornos del movimiento - Evalúa y trata pacientes con comorbilidades médicas que afecten la intervención neuroquirúrgica funcional - Realiza el tratamiento peroperatorio rutinario de los pacientes tratados mediante neurocirugía funcional - Inicia la evaluación de un paciente con una crisis aparente - Reconoce e inicia el tratamiento del estatus epiléptico | - Explica los riesgos y beneficios de los procedimientos neuroquirúrgicos para la cirugía de la epilepsia y los trastornos del movimiento - Interpreta los estudios diagnósticos - Ayuda con los componentes rutinarios de los procedimientos funcionales (trépanos, craneotomías, cambio de generador) - Reconoce e inicia el tratamiento de complicaciones (hematomas, crisis, infecciones, malfunción del dispositivo) - Coloca el marco estereotáxico | - Desarrolla la evaluación y un plan terapéutico para pacientes con epilepsia y trastornos del movimiento (p. ej. Enf. de Parkinson, Temblor esencial) - Realiza de forma independiente procedimientos funcionales de rutina (Colocación del electrodo de estimulación cerebral profunda o de electrodo subdural, topectomía) - Realiza procedimientos funcionales complejos con ayuda (p.ej. lobectomía temporal) - Maneja complicaciones con ayuda - Realiza localizaciones estereotáxicas usando sistemas basados o no en marcos estereotáxicos | - Desarrolla de forma independiente un plan de tratamiento para pacientes con comorbilidades u otros factores que compliquen el procedimiento (p.ej. foco de crisis en zona elocuente) - Realiza de forma independiente procedimientos complejos - Adapta planes de tratamiento estándar a circunstancias especiales (p.ej. cirugías previas, limitaciones neuropsicológicas) - Maneja de forma independiente complicaciones | - Realiza revisiones sistemáticas del resultado del tratamiento de la epilepsia y trastornos del movimiento - Participa en el desarrollo de mejoras de calidad del tratamiento de la epilepsia y/o los desórdenes del movimiento |
|  | | | | |
| Comentarios: No ha rotado todavía | | | | |

Tabla 8

| **Dolor y Nervio Periférico – Conocimiento médico** | | | | |
| --- | --- | --- | --- | --- |
| **Nivel 1** | **Nivel 2** | **Nivel 3** | **Nivel 4** | **Nivel 5** |
| - Describe la anatomía de las vías medulares y talámicas del dolor y del control del dolor. - Describe la anatomía de los plexos braquial y lumbar y de los nervios mayores de las extremidades. - Describe las clasificaciones de las lesiones del nervio y el pronóstico y evolución de la recuperación de cada una. | - Enumera los tratamientos médicos del dolor crónico (p.ej: neuralgia del trigémino, neuritis del plexo braquial). - Describe la anatomía y hallazgos físicos de las neuropatías por compresión de la extremidad superior más comunes. - Describe los hallazgos clínicos y el diagnóstico diferencial de la neuralgia del trigémino. - Enumera las indicaciones quirúrgicas para los pacientes con dolor crónico o trastornos del nervio periférico | - Describe la fisiopatología de los trastornos de dolor crónico. - Describe tratamientos no quirúrgicos de las neuropatías por compresión. - Describe la anatomía y hallazgos físicos de las neuropatías por compresión de la extremidad inferior más comunes. - Describe los hallazgos de la electromiografía (EMG) y estudios de conducción nerviosa en los trastornos de nervio periférico - Obtiene e interpreta estudios diagnósticos en los pacientes con dolor crónico y trastornos de nervio periférico | - Describe los resultados esperables tras la cirugía del dolor crónico (p.ej: descompresión microvaascular, lesiones tipo DREZ, cordotomías) . - Describe los resultados esperables tras la cirugía de los trastornos de nervio periférico (p.ej: neurolisis, anastomosis directas, injertos de nervio). - Describe la anatomía y fisiología de las lesiones medulares para el dolor (mielotomía, cordotomía). | - Contribuye a la literatura sobre el dolor crónico y/o trastornos de nervio periférico en publicaciones sometidas a revisión por pares. |
|  | | | | |
| Comentarios: No ha rotado todavía | | | | |

Tabla 9

| **Dolor y Nervio Periférico – Cuidado del paciente** | | | | |
| --- | --- | --- | --- | --- |
| **Nivel 1** | **Nivel 2** | **Nivel 3** | **Nivel 4** | **Nivel 5** |
| - Realiza una historia y exploración física en pacientes con dolor crónico o trastornos de nervio periférico. - Proporciona los cuidados perioperatorios habituales en pacientes con dolor crónico o trastornos de nervio periférico. - Inicia el estudio de un paciente con una lesión de nervio periférico. - Reconoce y comienza el tratamiento de la deprivación de baclofeno o sobredosis de morfina. | - Explica los riesgos y beneficios de los procedimientos neuroquirúrgicos para el tratamiento del dolor y de los trastornos de nervio periférico. - Interpreta los estudios diagnósticos. - Ayuda en los procedimientos más habituales (p.ej: descompresión del túnel del carpo, estimulación medular, bombas intratecales.) - Reconoce e inicia el estudio de las complicaciones (p.ej: hematomas, infecciones, malfunción de los dispositivos.) | - Elabora un plan de evaluación y tratamiento de los pacientes con dolor crónico y trastornos de nervio periférico (p.ej: neuralgia del trigémino, síndrome del túnel del carpo.) - Lleva a cabo de forma autónoma los procedimientos más habituales. - Realiza procedimientos complejos con ayuda (p.ej: lesiones de la entrada de la raíz posterior [DREZ], cordotomía, neuromas en continuidad, reparación de plexo braquial, injertos de nervio, transferencias de nervio.) - Trata complicaciones con ayuda. | - Elabora planes de tratamiento de pacientes con comorbilidades u otros factores adversos (p.ej: neuralgia del trigémino recurrente). - Lleva a cabo de forma autónoma procedimientos complejos. - Adapta planes de tratamiento estándar a circunstancias particulares (p.ej: reintervenciones, dolor por desaferentización) - Maneja complicaciones de forma autónoma. | - Realiza revisiones sistemáticas sobre los resultados de tratamiento del dolor y/o de los trastornos de nervio periférico. - Participa en la mejora de la calidad de la atención del dolor y/o de los trastornos de nervio periférico. |
|  | | | | |
| Comentarios: No ha rotado todavía | | | | |

Tabla 10

| **Neurocirugía Pediátrica – Cuidados del paciente** | | | | |
| --- | --- | --- | --- | --- |
| **Nivel 1** | **Nivel 2** | **Nivel 3** | **Nivel 4** | **Nivel 5** |
| - Realiza una historia clínica y exploración física apropiada para la edad con evaluación del desarrollo - Proporciona cuidados rutinarios perioperatorios a los pacientes de neurocirugía pediátrica - Programa y punciona válvulas - Evalúa la función de las válvulas de derivación de LCR - Reconoce e inicia la notificación y evaluación de un trauma no accidental | - Explica los riesgos y beneficios de los procedimientos neuroquirúrgicos a los padres y a los niños mayores - Interpreta los estudios diagnósticos identificando las variaciones que dependen de la edad - Ayuda en el quirófano en procedimientos de rutina (derivación de LCR, bombas de baclofeno, Chiari…) - Reconoce e inicia el diagnóstico de las complicaciones en niños pre-verbales (hematoma, infección, malfunción, deterioro del nivel de conciencia) | - Formula un plan de actuación y tratamiento para pacientes pediátricos (hidrocefalia, sinostosis, medula anclada) - Realiza de forma independiente procedimientos de rutina - Realiza procedimientos complejos con ayuda (tumor cerebral, reparación sinostosis, medula anclada, ventriculostomia, bypass indirecto, epilepsia) - Maneja las complicaciones con ayuda - Diagnostica la muerte encefálica en niños | - Formula de forma independiente el plan de tratamiento de pacientes con comorbilidad u otros factores de riesgo (anomalías congénitas de otros órganos) - Realiza de forma independiente procedimientos complejos - Adapta planes de tratamiento estándar a situaciones especiales (cirugía previa, retraso desarrollo, coagulopatía) - Maneja las complicaciones de forma independiente | - Revisa de forma sistemática el resultado final de los tratamientos en neurocirugía pediátrica - Participa en la mejora de la calidad de la neurocirugía pediátrica - Formula planes de diagnóstico y manejo para un paciente con una derivación de LCR funcionante y cefaleas crónicas - Aconseja a los futuros padres sobre anomalías congénitas - Realiza una estabilización de la columna en pacientes menores de 3 años |
|  | | | | |
| Comentarios: No ha rotado todavía | | | | |

Tabla 11

| **Neurocirugía Pediátrica – Conocimiento médico** | | | | |
| --- | --- | --- | --- | --- |
| **Nivel 1** | **Nivel 2** | **Nivel 3** | **Nivel 4** | **Nivel 5** |
| - Describe la embriología de las anomalías congénitas comunes del SNC - Describe la fisiología normal de LCR - Describe la respuesta del cerebro en desarrollo al daño - Describe los cambios en el desarrollo en las funciones cardio- pulmonares y los signos vitales - Describe la utilización y dosificación apropiada de los narcóticos en niños - Calcula el volumen de sangre circulante en lactantes y niños | - Describe la fisiopatología de LCR en distintas formas de hidrocefalia - Describe las características clínicas y radiológicas de los tumores del SNC en niños de distinta edad - Describe las características clínicas y radiológicas de la hidrocefalia, la macrocefalia benigna y los higromas subdurales. - Describe los hallazgos físicos y mecanismos de las anomalías de la forma de la cabeza | - Describe la historia natural de anomalías congénitas del SNC - Describe las implicaciones del desarrollo de la c. vertebral en los patrones de daño y opciones de tratamiento en niños - Describe el impacto de la epilepsia refractaria y la parálisis cerebral en el desarrollo y la función - Describe las estrategias de tratamiento para tumores de SNC - Identifica métodos para limitar la exposición a radiación en técnicas de imagen | - Describe el efecto de la derivación quirúrgica en la fisiología del LCR - Describe los riesgos, “screening”, incidencia y manejo de los efectos tardíos de la quimioterapia y radioterapia para tumores del SNC - Describe la historia natural de la sinostosis craneal y la médula anclada con y sin cirugía - Describe el pronóstico médico y funcional a largo plazo en placientes con mielomeningocele | - Contribuye a la revisión crítica de la literatura en neurocirugía pediátrica - Describe las alteraciones moleculares asociadas a las anomalías congénitas y los tumores del SNC - Describe el diagnóstico diferencial y la fisiopatología de las alteraciones del movimiento adquiridas y congénitas |
|  | | | | |
| Comentarios: No ha rotado todavía | | | | |

Tabla 12

| **Neurocirugía raquídea: Patología degenerativa – Conocimiento médico** | | | | |
| --- | --- | --- | --- | --- |
| **Nivel 1** | **Nivel 2** | **Nivel 3** | **Nivel 4** | **Nivel 5** |
| - Describe la anatomía vertebral y radicular por nivel. - Describe los hallazgos físicos y realiza el diagnóstico diferencial de la enfermedad degenerativa raquídea (Ej. Radiculopatía, claudicación neurógena, mielopatía) - Describe los principios básicos de biomecánica espinal | - Describe el tratamiento médico y físico de la patología raquídea degenerativa. - Enumera las indicaciones y opciones quirúrgicas para la patología raquídea degenerativa. - Describe los hallazgos en las pruebas de imagen de patología raquídea degenerativa (Ej. Radiología simple, RM, mielografía). - Conoce la historia natural de la patología raquídea degenerativa. - Describe los hallazgos en EMG propio de la mieloradiculopatía espondilótica. | - Describe la fisiopatología de la mieloradiculopatía espondilótica degenerativa. - Describe y categoriza las deformidades raquídeas por imagen (Ej. Escoliosis, espondilolistesis lumbar). - Describe las indicaciones para los distintos abordajes anteriores o posteriores a la columna espinal. - Conoce el papel de la instrumentación y fusión ósea en la cirugía de la patología raquídea degenerativa. | - Conoce la evolución esperada sobre mejoría dolor y situación funcional tras cirugía de la patología raquídea degenerativa. - Describe los criterios para considerar reintervenir a pacientes con patología raquídea degenerativa. - Enumera las indicaciones de vertebroplastia y cifoplastia. - Describe la genética, fisiopatología y hallazgos de imagen de los procesos raquídeos inflamatorios. | - Colabora en la revisión literatura sometida a revisión por pares sobre patología raquídea degenerativa. - Evalúa e introduce nuevas medidas para mejorar la eficiencia de la cirugía de patología raquídea degenerativa. |
|  | | | | |
| Comentarios: No ha rotado todavía | | | | |

Tabla 13

| **Neurocirugía raquídea: Trauma, Tumor, Infección – Conocimiento médico** | | | | |
| --- | --- | --- | --- | --- |
| **Nivel 1** | **Nivel 2** | **Nivel 3** | **Nivel 4** | **Nivel 5** |
| - Describe la anatomía de la médula espinal y cola de caballo. - Describe los niveles dermatomas sensitivos y motores así como los patrones de lesión medular. - Define la estabilidad e inestabilidad espinal. - Describe la fisiopatología de la lesión vertebral y medular. | - Describe el tratamiento médico de las infecciones raquídeas. - Describe el uso y tipos de corsé en el manejo de patología raquídea traumática, infecciosa o tumoral. - Clasifica las fracturas espinales por mecanismo e imagen radiológica. - Enumera las indicaciones, contraindicaciones y opciones quirúrgicas para el tratamiento de patología raquídea traumática, infecciosa o tumoral. - Describe la historia natural de los tumores primarios raquídeos. | - Describe la fisiopatología y hallazgos de imagen de los tumores raquídeos (Ej. Tumor intradural, metástasis vertebral). - Describe la fisiopatología y hallazgos de imagen de las infecciones raquídeas (Ej. Discitis, absceso epidural, tuberculosis, osteomielitis). - Describe el papel de la instrumentación y la osteosíntesis en la cirugía de la patología raquídea traumática, infecciosa o tumoral. | - Describe la evolución a corto y largo plazo esperada tras cirugía de patología raquídea traumática, infecciosa o tumoral. - Describe los factores que afectan la evolución de la cirugía raquídea tumoral (Ej. Extensión resección). - Describe el uso de complementos durante la cirugía de patología raquídea tumoral o traumática (Ej. Guías de imagen, ultrasonido, monitorización neurofisiológica), - Describe el papel de la radioterapia en el tratamiento de tumores raquídeos. | - Contribuye en la revisión de la literatura sometida a revisión por pares sobre patología raquídea traumática, infecciosa o tumoral. - Diseña de ensayos clínicos sobre patología raquídea traumática, infecciosa o tumoral. |
|  | | | | |
| Comentarios: No ha rotado todavía | | | | |

Tabla 14

| **Neurocirugía raquídea – Cuidado del paciente** | | | | |
| --- | --- | --- | --- | --- |
| **Nivel 1** | **Nivel 2** | **Nivel 3** | **Nivel 4** | **Nivel 5** |
| - Realiza historia clínica y exploración física en pacientes con patología raquídea. - Evalúa y maneja tratamiento de pacientes con comorbilidades que pueden influenciar la cirugía raquídea programada. - Proporciona los cuidados perioperatorios habituales en los pacientes con patología raquídea. - Inicia el estudio diagnóstico de los pacientes con mielopatía o radiculopatía. - Conocimiento de las posiciones quirúrgicas seguras para los procedimientos raquídeos. | - Explicar riesgos y beneficios de la cirugía raquídea. - Interpretar estudios diagnósticos (ej: imagen, EMG). - Inicia manejo del paciente con lesión medular aguda. - Realiza tracciones/reducciones cervicales. - Ayuda en los procedimientos habituales raquídeos (Ej. laminectomía lumbar o cervical, discectomía lumbar). - Reconoce e inicia el estudio diagnóstico diferencial de posibles complicaciones (fístula LCR, infección, radiculitis). | - Elabora un plan de manejo y tratamiento para pacientes con enfermedad raquídea degenerativa lumbar o cervical. - Formula un plan quirúrgico y tratamiento adyuvante para pacientes con neoplasias raquídea. - Realiza de forma independiente procedimientos habituales raquídeos. - Realiza procedimientos complejos con ayuda (Ej. Discectomía cervical anterior y fusión, fijación lumbar posterior, escisión de tumor medular, osteosíntesis fracturas). - Maneja complicaciones con ayuda. | - Formula de forma independiente un plan de tratamiento para los pacientes con comorbilidades, intervenciones previas y otros factores de riesgo de complicación (Ej., politraumatizados, coagulopatía). - Realiza de forma independiente procedimientos complejos. - Realiza con ayuda procedimientos avanzados (Ej. Reconstrucción toracolumbar o craneocervical, reconstrucción tras infección o escisión de tumor vertebral. - Maneja complicaciones de forma independiente. | - Realiza revisiones sistemáticas sobre el efecto del tratamiento de la patología raquídea - Participa en la mejoría de la calidad para el manejo la patología raquídea. - Lidera grupos interdisciplinarios para el manejo de enfermedades raquídeas complejas - Realiza de forma independiente procedimientos avanzados |
|  | | | | |
| Comentarios: No ha rotado todavía | | | | |

Tabla 15

| **Neurocirugía Vascular – Conocimiento médico** | | | | |
| --- | --- | --- | --- | --- |
| **Nivel 1** | **Nivel 2** | **Nivel 3** | **Nivel 4** | **Nivel 5** |
| - Describe la anatomía vascular intra y extracraneal, incluyendo los distintos territorios vasculares. - Describe los mecanismos de autorregulación cerebral. - Describe las presentaciones clínicas y las características de imagen de los ictus isquémicos y hemorrágicos. - Describe la embriología y anatomía de las lesiones vasculares (ej: aneurismas y malformaciones vasculares) - Describe la fisiopatología de la enfermedad aterosclerótica intra y extracraneal. | - Enumera las indicaciones de terapia trombolítica iv en el ictus isquémico. - Enumera las indicaciones de endarterectomía carotidea y de angioplastia/stent carotideo. - Describe la historia natural de aneurismas y malformaciones vasculares. - Enumera las indicaciones de tto. quirúrgico y endovascular de aneurismas y malformaciones vasculares. - Describe la clínica y la imagen de la isquemia cerebral tardía tras HSA. - Describe los hallazgos de imagen en la patología cerebrovascular común. | - Describe la fisiopatología del ictus isquémico(ej: necrosis y muerte celular por apoptosis). - Describe los métodos de evaluación de la perfusión cerebral y el flujo sanguíneo. - Enumera las indicaciones de terapia quirúrgica y endovascular de los aneurismas cerebrales complejos y malformaciones vasculares. - Describe las características de imagen y angiografía de las vasculopatías cerebrales (ej: enfermedad aterosclerótica, disección, vasculitis) | - Describe los resultados esperados para las terapias quirúrgica y endovascular de la patología vascular intra y extracraneal. - Describe las indicaciones para el tratamiento médico vs endovascular de la estenosis arterial intracraneal. - Describe los mecanismos moleculares de las estrategias de protección frente a la isquemia. - Describe la genética y herencia de las cavernomatosis familiares y la telangiectasia hereditaria hemorrágica. | - Contribuye a la revisión de la literatura sometida a revisión por pares en la patología cerebrovascular. |
|  | | | | |
| Comentarios: No ha rotado todavía | | | | |

Tabla 16

| **Neurocirugía Vascular – Cuidado del paciente** | | | | |
| --- | --- | --- | --- | --- |
| **Nivel 1** | **Nivel 2** | **Nivel 3** | **Nivel 4** | **Nivel 5** |
| - Realiza la historia y examen físico en pacientes con ictus isquémico o hemorrágico. - Proporciona cuidados perioperatorios rutinarios para pacientes sometidos a cirugía vascular intra y extracraneal. - Inicia el diagnóstico de pacientes con ictus isquémico o hemorrágico. - Explica los riesgos y beneficios de una arteriografía diagnóstica. | - Explica los riesgos y beneficios de la cirugía y la terapia endovascular de aneurismas, malformaciones vasculares e ictus isquémicos. - Interpretar TC, RM y arteriografía cerebrales. - Ayuda con los componentes rutinarios de los procedimientos (ej: craneotomía pterional, arteriografía diagnóstica) - Reconoce e inicia el proceso diagnóstico de las complicaciones tras cirugía o terapia endovascular (hemorragia, ictus isquémico, compromiso cardiovascular) | - Elabora un plan de manejo y tratamiento para un paciente con aneurisma, malformación vascular o ictus isquémicos. - Realiza de forma independiente las partes rutinarias de los procedimientos. - Realiza procedimientos complejos con ayuda (ej: endarterectomía carotidea, clipaje aneurismático, resección de malformación arteriovenosa). - Maneja las complicaciones con ayuda. | - Es capaz, sin ayuda, de formular un plan de tratamiento para enfermos con comorbilidades u otros factores complejos (ej: ictus previo, patología arterial coronaria, anticoagulación). - Realiza de forma independiente procedimientos complejos. - Realiza procedimientos avanzados con ayuda (ej: embolización de aneurismas con coils, de malformaciones arteriovenosas, bypass extra-intracraneal). - Maneja las complicaciones de forma independiente. | - Revisa de forma sistemática los resultados del tratamiento de la patología neurovascular. - Participa en la mejora de calidad en el campo de la patología neurovascular. - Realiza procedimientos avanzados de forma rutinaria. |
|  | | | | |
| Comentarios: No ha rotado todavía | | | | |

Tabla 17

| **Comunicación y relaciones interpersonales** | | | | |
| --- | --- | --- | --- | --- |
| **Nivel 1** | **Nivel 2** | **Nivel 3** | **Nivel 4** | **Nivel 5** |
| - Describe los principios éticos del consentimiento informado - Describe los métodos para transmitir malas noticias - Identifica los elementos para una segura transferencia de información en los intercambios - Prioriza y lleva eventos clínicos críticos simultáneos | - Obtiene y documenta el consentimiento informado - Participa en la trasmisión de malas noticias a un paciente o sus familiares - Participa en una discusión de Testamento Vital - Lidera las pausas en un procedimiento - Usa el “checklist” y la informática para ayudar a la transferencia de la información - Se comunica adecuadamente con pacientes y familiares de diferentes estratos socioeconómicos y culturales - Prioriza y maneja eventos clínicos críticos simultáneos | - Obtiene y documenta el consentimiento informado en circunstancias especiales (ej. Barreras culturales o idiomáticas) - Transmite malas noticias a un paciente o sus familiares - Lidera y documenta una discusión una discusión de Testamento Vital - Supervisa las transferencias de información - Se comunica adecuadamente con médicos, profesionales de la salud y agencias de salud | - Cuantifica la evidencia del análisis riesgo-beneficio durante el consentimiento informado para una intervención neuroquirúrgica compleja programada - Maneja y documenta un resultado inesperado - Lidera la respuesta ante una emergencia inesperada crítica o intraoperatoria - Actúa como consultor ante otros médicos | - Diseña un consentimiento para un estudio de investigación en humanos; presenta una solicitud para una comité de revisión institucional (IRB) - Diseña y pone en marcha un procedimiento de seguridad - Diseña y pone en marcha la formación de un equipo y un ejercicio de comunicación |
|  | | | | |
| Comentarios: No ha rotado todavía | | | | |

Tabla 18

| **Comunicación y relaciones interpersonales - Tecnología** | | | | |
| --- | --- | --- | --- | --- |
| **Nivel 1** | **Nivel 2** | **Nivel 3** | **Nivel 4** | **Nivel 5** |
| - Utiliza la historia clínica electrónica y los sistemas de acceso a radiología para informar a tiempo real de la situación clínica - Crea órdenes para el paciente de forma precisa y demuestra el uso de los mecanismo de seguridad de historia electrónica en lo que se refiere a la dosificación e interacción de los fármacos | - Completa los registros de casos de la ACGME y los informes quirúrgicos a tiempo y de forma precisa - Enumera los elementos necesarios para la evaluación y codificación en cada nivel / tipo de encuentro | - Utiliza la los sistemas de protección de datos - Diseña e implementa un modelo de historia clínica electrónica | - Crea o actualiza una guía clínica de cuidados neuroquirúrgicos, implementando su uso. | - Utiliza los registros de la historia clínica electrónica con permiso para llevar a cabo una investigación y/o una mejora de calidad, informa de los resultados |
|  | | | | |
| Comentarios: No ha rotado todavía | | | | |

Tabla 19

| **Profesionalismo - Compasión** | | | | |
| --- | --- | --- | --- | --- |
| **Nivel 1** | **Nivel 2** | **Nivel 3** | **Nivel 4** | **Nivel 5** |
| - Demuestra una interacción honesta con el paciente; respeta su privacidad y autonomía - Describes los principios básicos de la bioética | - Forma vínculos terapéuticos efectivos con los pacientes; recibe elogios de los pacientes y sus familiares - Identifica y maneja los desafíos éticos más frecuentes durante el cuidado de los pacientes | - Suaviza o minimiza el impacto de las diferencias culturales, raciales y socioeconómicas en el cuidado de los pacientes - Responde a las necesidades de los pacientes que suplantan al propio interés personal | - Identifica y maneja los desafíos éticos complejos durante el cuidado de los pacientes - Actúa como un mentor y modelo a seguir por otros residentes | - Participa o elabora programas para promover la igualdad de cuidados en pacientes más vulnerables y desatendidos - Participa o diseña programas de bienestar mental en médicos |
|  | | | | |
| Comentarios: No ha rotado todavía | | | | |

Tabla 20

| **Profesionalismo - Responsabilidad profesional** | | | | |
| --- | --- | --- | --- | --- |
| **Nivel 1** | **Nivel 2** | **Nivel 3** | **Nivel 4** | **Nivel 5** |
| - Es puntual en las sesiones, conferencias, pases de planta y cirugías - Maneja la fatiga y falta de sueño - Reporta las “duty hours” puntualmente y de manera rigurosa - Presenta vestimenta adecuada y conducta respetuosa - Solicita información al paciente de manera veraz, diligente y confidencial | - Reconoce los límites individuales en situaciones clínicas y pide ayuda cuando la necesita - Maneja su propia salud emocional, física y mental - Busca y acepta critica profesional | - Demuestra responsabilidad en las complicaciones y el pronóstico de los pacientes - Actúa como líder efectivo para otros médicos y profesionales de la salud - Lidera discusiones en sesiones de morbimortalidad | - Asume liderazgo y responsabilidad en decisiones en un equipo - Media en conflictos entre miembros del equipo - Reconoce y responde a deficiencias de otros médicos y de él mismo | - Sirve como modelo para otros residentes en comportamiento ético y profesionalismo - Participa o lidera programas institucionales de ética |
|  | | | | |
| Comentarios: No ha rotado todavía | | | | |

Tabla 21

| **Práctica basada en el sistema - Economía** | | | | |
| --- | --- | --- | --- | --- |
| **Nivel 1** | **Nivel 2** | **Nivel 3** | **Nivel 4** | **Nivel 5** |
| - Identifica el rango de la variación de la práctica (ej., medicación, pruebas de laboratorio, imágenes y procedimientos.) - Describe el sistema de pagos de salud | - Describe el impacto del costo de la variación de la práctica en el contexto del sistema y la utilización de los recursos nacionales de salud. - Describe los principios de la codificación ética (ej., diagnóstico, evaluación y manejo (E&M) y procedimientos) | - Utiliza los recursos del sistema de salud responsablemente (ej., indicación de pruebas, eficiencia de quirófanos, altas/transferencias a tiempo). - Codifica con precisión los diagnósticos y procedimientos en el ACGME sistema de registro de casos. | - Cita revisiones de expertos acerca del costo y datos de resultados para sustentar las decisiones sobre la utilización de recursos. | - Diseña e implementa vías costo-efectivas de atención del paciente con monitorización y mecanismos de retroalimentación. |
|  | | | | |
| Comentarios: No ha rotado todavía | | | | |

Tabla 22

| **Práctica basada en el sistema - Seguridad y Sistemas** | | | | |
| --- | --- | --- | --- | --- |
| **Nivel 1** | **Nivel 2** | **Nivel 3** | **Nivel 4** | **Nivel 5** |
| - Define los errores médicos, cuasi accidentes y eventos centinela; proporciona ejemplos basados en el sistema de cada uno de ellos. - Asiste al coordinador de cuidados con las altas y arreglos de servicios ambulatorios. - Trabaja en equipos multidisciplinarios para mejorar la seguridad y calidad. | - Utiliza protocolos y listas de verificación para el pase de pacientes, órdenes de medicación y emergencias. - Efectúa transferencias entre servicios, incluyendo registros y comunicaciones médicas. | - Reporta comportamientos problemáticos, procesos y dispositivos, incluyendo errores y cuasi errores. - Coordina la atención hospitalaria interdisciplinaria. | - Conduce los análisis de causa principal o modo de fallo de los sistemas basados en errores y efectúa la profilaxis. - Coordina equipos para procedimientos interdisciplinarios. - Establece líneas de tiempo e identifica los recursos para la transición a la práctica. - Mejora el sistema de atención para conseguir un óptimo cuidado de los pacientes. - Trabaja con eficacia en diversos entornos y sistemas de prestación de atención de salud. | - Dirige equipos multidisciplinarios de seguridad del paciente e iniciativas. - Dirige equipos interdisciplinarios de cuidados o clínicos. - Tutela a otros colegas en la construcción de la práctica y la administración. |
|  | | | | |
| Comentarios: No ha rotado todavía | | | | |

Tabla 23

| **Aprendizaje basado en la práctica y perfeccionamiento - Autoaprendizaje** | | | | |
| --- | --- | --- | --- | --- |
| **Nivel 1** | **Nivel 2** | **Nivel 3** | **Nivel 4** | **Nivel 5** |
| - Identifica sus propias limitaciones en el conocimiento, habilidades y experiencia, incorpora la retroalimentación. - Demuestra habilidades en la tecnología de la información para la recopilación de evidencia. | - Establece metas de aprendizaje y perfeccionamiento; identifica recursos, y lleva a cabo actividades de aprendizaje apropiadas. | - Utiliza datos para el perfeccionamiento de la práctica (ej., revisiones sistemáticas, meta-análisis, guías de práctica, datos de resultados clínicos) | - Participa en el perfeccionamiento de la práctica basada en la evidencia. - Organiza actividades docentes en el nivel del programa. | - Desarrolla el currículum docente y/o herramientas de evaluación. |
|  | | | | |
| Comentarios: No ha rotado todavía | | | | |

Tabla 24

| **Aprendizaje basado en la práctica y perfeccionamiento - Investigación** | | | | |
| --- | --- | --- | --- | --- |
| **Nivel 1** | **Nivel 2** | **Nivel 3** | **Nivel 4** | **Nivel 5** |
| - Describe conceptos básicos en epidemiología clínica, bioestadística y razonamiento clínico - Describe el diseño y uso de registros de datos clínicos para el perfeccionamiento de la práctica | - Categoriza los diseños de estudios de investigación; evaluando su calidad y relevancia - Contribuye a la revisión por pares de literatura neuroquirúrgica - Incorpora la evidencia en las decisiones clínicas de manera rutinaria | - Contribuye con información científica o sistemática a literatura con revisión por pares - Participa en la recopilación y análisis de datos clínicos | - Formula cuestiones o hipótesis, diseña investigación, ejecuta proyectos y reporta resultados - Utiliza datos de morbimortalidad para establecer cambios sistemáticos en la práctica clínica | - Formula un plan, presupuesta y ejecuta una investigación de manera independiente - Lidera o participa en ensayos clínicos de investigación - Participa en los procesos de revisión de fondos para la investigación y/o en la revisión por pares - Lidera o participa en registros de resultados clínicos |
|  | | | | |
| Comentarios: No ha rotado todavía | | | | |
