# Supplementary material
Source: Elsevier journal article supplement (https://www.sciencedirect.com/science/article/pii/S1130147316000233)
Supplement: mmc6 [file S1130147316000233:mmc6.xlsx]

## Sheet: Hoja1
	COMPETENCIAS QUIRÚRGIAS EN EL 2º AÑO DE RESIDENCIA		NOMBRE:					COMPETENCIAS QUIRÚRGIAS EN EL 3º AÑO DE RESIDENCIA		NOMBRE:					COMPETENCIAS QUIRÚRGIAS EN EL 4º AÑO DE RESIDENCIA		NOMBRE:					COMPETENCIAS QUIRÚRGIAS EN EL 5º AÑO DE RESIDENCIA		NOMBRE:					COMPETENCIAS QUIRÚRGIAS EN EL 6º AÑO DE RESIDENCIA		NOMBRE:
A =	No capaz de realizar el procedimiento		FECHA:				A =	No capaz de realizar el procedimiento		FECHA:				A =	No capaz de realizar el procedimiento		FECHA:				A =	No capaz de realizar el procedimiento		FECHA:				A =	No capaz de realizar el procedimiento		FECHA:
B =	Competencia suficiente para realizar el procedimiento bajo supervisión directa						B =	Competencia suficiente para realizar el procedimiento bajo supervisión directa						B =	Competencia suficiente para realizar el procedimiento bajo supervisión directa						B =	Competencia suficiente para realizar el procedimiento bajo supervisión directa						B =	Competencia suficiente para realizar el procedimiento bajo supervisión directa
C =	Competencia suficiente para realizar el procedimiento sin supervisión directa						C =	Competencia suficiente para realizar el procedimiento sin supervisión directa						C =	Competencia suficiente para realizar el procedimiento sin supervisión directa						C =	Competencia suficiente para realizar el procedimiento sin supervisión directa						C =	Competencia suficiente para realizar el procedimiento sin supervisión directa
D =	Competencia suficiente para instruir a otros en el procedimiento y resolver						D =	Competencia suficiente para instruir a otros en el procedimiento y resolver						D =	Competencia suficiente para instruir a otros en el procedimiento y resolver						D =	Competencia suficiente para instruir a otros en el procedimiento y resolver						D =	Competencia suficiente para instruir a otros en el procedimiento y resolver
	posibles complicaciones durante el mismo sin supervisión directa							posibles complicaciones durante el mismo sin supervisión directa							posibles complicaciones durante el mismo sin supervisión directa							posibles complicaciones durante el mismo sin supervisión directa							posibles complicaciones durante el mismo sin supervisión directa
		A	B	C	D				A	B	C	D				A	B	C	D				A	B	C	D				A	B	C	D
Técnicas básicas	Realización de trépanos						Técnicas básicas	Realización de trépanos						Técnicas básicas	Realización de trépanos						Técnicas básicas	Realización de trépanos						Técnicas básicas	Realización de trépanos
	Craniotomia							Craniotomia							Craniotomia							Craniotomia							Craniotomia
Trauma craneal	Craniotomía- hematoma epidural y evacuación						Trauma craneal	Craniotomía- hematoma epidural y evacuación						Trauma craneal	Craniotomía- hematoma epidural y evacuación						Trauma craneal	Craniotomía- hematoma epidural y evacuación						Trauma craneal	Craniotomía- hematoma epidural y evacuación
	Craniotomía - hematoma subdural agudo y evacuación							Craniotomía - hematoma subdural agudo y evacuación							Craniotomía - hematoma subdural agudo y evacuación							Craniotomía - hematoma subdural agudo y evacuación							Craniotomía - hematoma subdural agudo y evacuación
	Craniotomía - contusión cerebral							Craniotomía - contusión cerebral							Craniotomía - contusión cerebral							Craniotomía - contusión cerebral							Craniotomía - contusión cerebral
	Fracturas deprimidas							Fracturas deprimidas							Fracturas deprimidas							Fracturas deprimidas							Fracturas deprimidas
	Trépanos - hematoma subdural crónico							Trépanos - hematoma subdural crónico							Trépanos - hematoma subdural crónico							Trépanos - hematoma subdural crónico							Trépanos - hematoma subdural crónico
Tumores	Biopsia estereotáctica / Neuronavagación						Tumores	Biopsia estereotáctica / Neuronavagación						Tumores	Biopsia estereotáctica / Neuronavagación						Tumores	Biopsia estereotáctica / Neuronavagación						Tumores	Biopsia estereotáctica / Neuronavagación
Supratentoriales:	Craniotomia - tumor intra axial						Supratentoriales:	Craniotomia - tumor intra axial						Supratentoriales:	Craniotomia - tumor intra axial						Supratentoriales:	Craniotomia - tumor intra axial						Supratentoriales:	Craniotomia - tumor intra axial
	Meningioma - con invasión de la calota							Meningioma - con invasión de la calota							Meningioma - con invasión de la calota							Meningioma - con invasión de la calota							Meningioma - con invasión de la calota
	Meningioma - parasagital							Meningioma - parasagital							Meningioma - parasagital							Meningioma - parasagital							Meningioma - parasagital
	Meningioma - complejo de la base del cráneo							Meningioma - complejo de la base del cráneo							Meningioma - complejo de la base del cráneo							Meningioma - complejo de la base del cráneo							Meningioma - complejo de la base del cráneo
Tumores de la línea	Macroadenoma transesfenoidal						Tumores de la línea	Macroadenoma transesfenoidal						Tumores de la línea	Macroadenoma transesfenoidal						Tumores de la línea	Macroadenoma transesfenoidal						Tumores de la línea	Macroadenoma transesfenoidal
Media:	Microadenoma transesfenoidal						Media:	Microadenoma transesfenoidal						Media:	Microadenoma transesfenoidal						Media:	Microadenoma transesfenoidal						Media:	Microadenoma transesfenoidal
	Tumor intraventricular abordaje transcalloso							Tumor intraventricular abordaje transcalloso							Tumor intraventricular abordaje transcalloso							Tumor intraventricular abordaje transcalloso							Tumor intraventricular abordaje transcalloso
	Tumor intraventricular abordaje endoscópico							Tumor intraventricular abordaje endoscópico							Tumor intraventricular abordaje endoscópico							Tumor intraventricular abordaje endoscópico							Tumor intraventricular abordaje endoscópico
Tumores de fosa	IV ventrículo						Tumores de fosa	IV ventrículo						Tumores de fosa	IV ventrículo						Tumores de fosa	IV ventrículo						Tumores de fosa	IV ventrículo
Posterior:	Hemisféricos-vermianos						Posterior:	Hemisféricos-vermianos						Posterior:	Hemisféricos-vermianos						Posterior:	Hemisféricos-vermianos						Posterior:	Hemisféricos-vermianos
	Ängulo pontocerebeloso							Ängulo pontocerebeloso							Ängulo pontocerebeloso							Ängulo pontocerebeloso							Ängulo pontocerebeloso
Hidrocefalia	Derivación ventricular externa						Hidrocefalia	Derivación ventricular externa						Hidrocefalia	Derivación ventricular externa						Hidrocefalia	Derivación ventricular externa						Hidrocefalia	Derivación ventricular externa
	Derivación ventrículo peritoneal							Derivación ventrículo peritoneal							Derivación ventrículo peritoneal							Derivación ventrículo peritoneal							Derivación ventrículo peritoneal
	Revisión valvular							Revisión valvular							Revisión valvular							Revisión valvular							Revisión valvular
Neuroendoscopia	Ventriculostomía						Neuroendoscopia	Ventriculostomía						Neuroendoscopia	Ventriculostomía						Neuroendoscopia	Ventriculostomía						Neuroendoscopia	Ventriculostomía
Vascular	craniotomía - aneurisma						Vascular	craniotomía - aneurisma						Vascular	craniotomía - aneurisma						Vascular	craniotomía - aneurisma						Vascular	craniotomía - aneurisma
	craniotomía - MAV							craniotomía - MAV							craniotomía - MAV							craniotomía - MAV							craniotomía - MAV
	craniotomía - hematoma cerebral espontáneo y evacuación							craniotomía - hematoma cerebral espontáneo y evacuación							craniotomía - hematoma cerebral espontáneo y evacuación							craniotomía - hematoma cerebral espontáneo y evacuación							craniotomía - hematoma cerebral espontáneo y evacuación
	Hematoma de fosa posterior							Hematoma de fosa posterior							Hematoma de fosa posterior							Hematoma de fosa posterior							Hematoma de fosa posterior
Columna	Discectomía cervical anterior						Columna	Discectomía cervical anterior						Columna	Discectomía cervical anterior						Columna	Discectomía cervical anterior						Columna	Discectomía cervical anterior
	Discectomía lumbar posterior							Discectomía lumbar posterior							Discectomía lumbar posterior							Discectomía lumbar posterior							Discectomía lumbar posterior
	Artrodesis cervical posterior							Artrodesis cervical posterior							Artrodesis cervical posterior							Artrodesis cervical posterior							Artrodesis cervical posterior
	Artodesis lumbar posterior							Artodesis lumbar posterior							Artodesis lumbar posterior							Artodesis lumbar posterior							Artodesis lumbar posterior
	Tumor extradural							Tumor extradural							Tumor extradural							Tumor extradural							Tumor extradural
	Tumor intradural extramedular							Tumor intradural extramedular							Tumor intradural extramedular							Tumor intradural extramedular							Tumor intradural extramedular
	Tumor intradural intramedular							Tumor intradural intramedular							Tumor intradural intramedular							Tumor intradural intramedular							Tumor intradural intramedular
Dolor	Neuralgia trigeminal-lesión						Dolor	Neuralgia trigeminal-lesión						Dolor	Neuralgia trigeminal-lesión						Dolor	Neuralgia trigeminal-lesión						Dolor	Neuralgia trigeminal-lesión
	Neuroestimulación medular							Neuroestimulación medular							Neuroestimulación medular							Neuroestimulación medular							Neuroestimulación medular
	Bombas intratecales							Bombas intratecales							Bombas intratecales							Bombas intratecales							Bombas intratecales
INFANTIL							INFANTIL							INFANTIL							INFANTIL							INFANTIL
Trauma craneal	Contusión cerebral						Trauma craneal	Contusión cerebral						Trauma craneal	Contusión cerebral						Trauma craneal	Contusión cerebral						Trauma craneal	Contusión cerebral
	Hematoma subdural crónico/ Higromas							Hematoma subdural crónico/ Higromas							Hematoma subdural crónico/ Higromas							Hematoma subdural crónico/ Higromas							Hematoma subdural crónico/ Higromas
	Fracturas deprimidas/ en crecimiento							Fracturas deprimidas/ en crecimiento							Fracturas deprimidas/ en crecimiento							Fracturas deprimidas/ en crecimiento							Fracturas deprimidas/ en crecimiento
Tumores	Supratentorial						Tumores	Supratentorial						Tumores	Supratentorial						Tumores	Supratentorial						Tumores	Supratentorial
	Infratentorial							Infratentorial							Infratentorial							Infratentorial							Infratentorial
	Biopsia estereotáctica/ Neuronavegación							Biopsia estereotáctica/ Neuronavegación							Biopsia estereotáctica/ Neuronavegación							Biopsia estereotáctica/ Neuronavegación							Biopsia estereotáctica/ Neuronavegación
Hidrocefalia	Drenaje ventricular externo						Hidrocefalia	Drenaje ventricular externo						Hidrocefalia	Drenaje ventricular externo						Hidrocefalia	Drenaje ventricular externo						Hidrocefalia	Drenaje ventricular externo
	Revisión valvular							Revisión valvular							Revisión valvular							Revisión valvular							Revisión valvular
	Arnold Chiari							Arnold Chiari							Arnold Chiari							Arnold Chiari							Arnold Chiari
	Ventriculostomía endoscópica							Ventriculostomía endoscópica							Ventriculostomía endoscópica							Ventriculostomía endoscópica							Ventriculostomía endoscópica
Columna	Mielomeningoceles						Columna	Mielomeningoceles						Columna	Mielomeningoceles						Columna	Mielomeningoceles						Columna	Mielomeningoceles
	Médula anclada/lipomas							Médula anclada/lipomas							Médula anclada/lipomas							Médula anclada/lipomas							Médula anclada/lipomas
Cirugía funcional	Espasticidad						Cirugía funcional	Espasticidad						Cirugía funcional	Espasticidad						Cirugía funcional	Espasticidad						Cirugía funcional	Espasticidad
	Cirugía de epilepsia							Cirugía de epilepsia							Cirugía de epilepsia							Cirugía de epilepsia							Cirugía de epilepsia
Craniofacial	Remodelaje craneal unisutural						Craniofacial	Remodelaje craneal unisutural						Craniofacial	Remodelaje craneal unisutural						Craniofacial	Remodelaje craneal unisutural						Craniofacial	Remodelaje craneal unisutural
	Remodelaje craneal polisutural							Remodelaje craneal polisutural							Remodelaje craneal polisutural							Remodelaje craneal polisutural							Remodelaje craneal polisutural
			Grado de competencia mínima adquirida							Grado de competencia mínima adquirida							Grado de competencia mínima adquirida							Grado de competencia mínima adquirida							Grado de competencia mínima adquirida
